# Supplementary material for: TC1725: a proposed chalcopyrite reference material for LA-MC-ICP-MS sulfur isotope determination
Source: Royal Society of Chemistry journal article supplement (doi:10.1039/d1ja00168j), 2021-01-01
Supplement: d1ja00168j1.xlsx [file d1ja00168j1.xlsx]

## Sheet: 溶液法
33/32 Raw	Error	34/32 Raw	Error	Total Beam (V)	Error	Sample Name	Date and Time	File Number
0.00826699	2.54e-06	0.0494877	8.8e-07	7.72603	0.0364	SPEX	Analysed on 29 December 2020 at 18:32	34178
0.00829567	1.54e-06	0.0494015	1.22e-06	6.55547	0.0452	TC1725	Analysed on 29 December 2020 at 18:41	34179		-1.85562	12.8171	0.0361298
0.00828281	2.23e-06	0.0494989	9.64e-07	7.52504	0.0363	SPEX	Analysed on 29 December 2020 at 18:50	34180
0.0082939	1.61e-06	0.0493932	1.49e-06	6.48201	0.0604	TC1725	Analysed on 29 December 2020 at 19:00	34181		-1.98128	12.6896	0.0434419
0.0082885	2.69e-06	0.0494837	1.21e-06	7.81697	0.0175	SPEX	Analysed on 29 December 2020 at 19:09	34182
0.00825645	1.44e-06	0.0493827	1.12e-06	7.02183	0.019	TC1725	Analysed on 29 December 2020 at 19:18	34183		-2.0321	12.638	0.0379401
0.00829073	1.62e-06	0.0494828	8.95e-07	8.03827	0.0345	SPEX	Analysed on 29 December 2020 at 19:27	34184
0.00826377	2.61e-06	0.049376	9.37e-07	6.97003	0.0271	TC1725	Analysed on 29 December 2020 at 19:37	34185		-2.07151	12.598	0.0374047	12.6857	0.190567
0.0082875	3.1e-06	0.0494742	1.32e-06	8.04012	0.0332	SPEX	Analysed on 29 December 2020 at 19:46	34186
0.008247	2.9e-06	0.0493674	9.92e-07	6.96465	0.0218	TC1725	Analysed on 29 December 2020 at 19:55	34187		-2.13803	12.5305	0.0415182
0.00828905	9.2e-07	0.0494721	1.22e-06	8.0136	0.0449	SPEX	Analysed on 29 December 2020 at 20:04	34188
0.00828544	2.75e-06	0.0493641	1.44e-06	6.81552	0.0272	TC1725	Analysed on 29 December 2020 at 20:13	34189		-2.07886	12.5906	0.0426554
0.00827071	1.17e-06	0.0494617	9.39e-07	8.24308	0.0223	SPEX	Analysed on 29 December 2020 at 20:23	34190
0.00829912	1.5e-06	0.0493708	1.36e-06	6.72034	0.0448	TC1725	Analysed on 29 December 2020 at 20:32	34191		-1.9178	12.754	0.0498765
0.00829315	2.73e-06	0.0494695	1.83e-06	7.94803	0.0362	SPEX	Analysed on 29 December 2020 at 20:41	34192
0.00828668	2.37e-06	0.0493629	1.69e-06	6.73512	0.0597	TC1725	Analysed on 29 December 2020 at 20:50	34193		-2.12692	12.5418	0.0588223	12.6042	0.206388
0.00830241	1.84e-06	0.0494668	1.5e-06	8.27531	0.0263	SPEX	Analysed on 29 December 2020 at 21:00	34194
0.00827308	3.08e-06	0.0493688	1.61e-06	7.48407	0.0388	TC1725	Analysed on 29 December 2020 at 21:09	34195		-1.94441	12.727	0.0475594
0.00827807	1.88e-06	0.0494632	8.26e-07	8.23937	0.0358	SPEX	Analysed on 29 December 2020 at 21:18	34196
0.00826793	3.83e-06	0.0493657	1.63e-06	7.50113	0.0432	TC1725	Analysed on 29 December 2020 at 21:27	34197		-1.94463	12.7268	0.0451536
0.00826598	1.78e-06	0.0494605	1.28e-06	8.20654	0.0279	SPEX	Analysed on 29 December 2020 at 21:37	34198
0.00827949	2.93e-06	0.0493683	2.12e-06	7.33035	0.0657	TC1725	Analysed on 29 December 2020 at 21:46	34199		-1.77864	12.8952	0.0577783
0.00824287	4.12e-06	0.0494519	1.42e-06	8.36876	0.0214	SPEX	Analysed on 29 December 2020 at 21:55	34200
0.00825318	3.12e-06	0.0493577	1.55e-06	7.64159	0.0493	TC1725	Analysed on 29 December 2020 at 22:04	34201		-2.01335	12.657	0.0530868	12.7515	0.202597
0.00827592	3.49e-06	0.0494626	1.57e-06	8.38125	0.0308	SPEX	Analysed on 29 December 2020 at 22:14	34202
0.00819845	4.13e-06	0.0494552	1.06e-06	8.4233	0.0376	SPEX	Analysed on 29 December 2020 at 22:30	34203
0.00814954	7.94e-06	0.0493535	1.68e-06	7.52223	0.0107	TC1725	Analysed on 29 December 2020 at 22:39	34204		-1.9334	12.7382	0.0482792
0.00809986	5.35e-06	0.0494429	1.32e-06	8.41238	0.019	SPEX	Analysed on 29 December 2020 at 22:48	34205
0.0081254	7.13e-06	0.0493534	1.17e-06	7.52541	0.0277	TC1725	Analysed on 29 December 2020 at 22:57	34206		-1.83843	12.8345	0.0450697
0.00803534	1.2e-05	0.0494457	1.36e-06	8.30072	0.0253	SPEX	Analysed on 29 December 2020 at 23:07	34207
0.00818778	2.47e-06	0.0493559	7.94e-07	7.15677	0.0208	TC1725	Analysed on 29 December 2020 at 23:18	34208		-2.02059	12.6497	0.0354986
0.00823743	2.38e-06	0.0494659	7.74e-07	8.45039	0.0373	SPEX	Analysed on 29 December 2020 at 23:27	34209
0.00819818	7.86e-06	0.0493497	1.35e-06	7.306	0.017	TC1725	Analysed on 29 December 2020 at 23:36	34210		-2.26488	12.4018	0.034481	12.6561	0.37108
0.00820531	2.67e-06	0.0494577	6.92e-07	8.36562	0.024	SPEX	Analysed on 29 December 2020 at 23:46	34211
0.00822606	2.4e-06	0.0493698	1.25e-06	7.7882	0.0334	TC1725	Analysed on 29 December 2020 at 23:55	34212		-1.84327	12.8296	0.0400492
0.00821251	6.71e-06	0.0494643	1.37e-06	8.45256	0.0106	SPEX	Analysed on 30 December 2020 at 00:04	34213
0.00816503	5.1e-06	0.0493629	7.38e-07	7.74051	0.0247	TC1725	Analysed on 30 December 2020 at 00:13	34214		-2.00669	12.6638	0.0352404
0.00819453	6.53e-06	0.04946	7.84e-07	8.58595	0.0276	SPEX	Analysed on 30 December 2020 at 00:23	34215
0.00814967	6.73e-06	0.0493802	1.43e-06	8.4407	0.0141	TC1725	Analysed on 30 December 2020 at 00:32	34216		-1.68498	12.9903	0.0406117
0.00819363	5.33e-06	0.049467	1.17e-06	8.51827	0.0229	SPEX	Analysed on 30 December 2020 at 00:41	34217
0.00806335	1.03e-05	0.0493663	2.22e-06	8.53104	0.00865	TC1725	Analysed on 30 December 2020 at 00:50	34218		-1.98315	12.6877	0.0520218	12.7929	0.301167
0.00815636	2.06e-06	0.0494617	5.52e-07	8.43777	0.0158	SPEX	Analysed on 30 December 2020 at 01:00	34219
0.00817802	4.26e-06	0.0494647	1.05e-06	8.6142	0.013	SPEX	Analysed on 30 December 2020 at 01:37	34223
0.00812323	6.88e-06	0.0493711	1.52e-06	8.20763	0.0332	TC1725	Analysed on 30 December 2020 at 01:46	34224		-1.90187	12.7702	0.0449083
0.00810248	6.07e-06	0.0494656	1.23e-06	8.5626	0.0281	SPEX	Analysed on 30 December 2020 at 01:55	34225
0.00806957	5.29e-06	0.0493733	1.51e-06	8.34573	0.0134	TC1725	Analysed on 30 December 2020 at 02:04	34226		-1.96544	12.7057	0.0444823
0.00819406	4.44e-06	0.0494754	1.02e-06	8.30491	0.0471	SPEX	Analysed on 30 December 2020 at 02:13	34227
0.00812485	1.01e-05	0.0493544	2.48e-06	6.96411	0.0158	TC1725	Analysed on 30 December 2020 at 02:23	34228		-2.13446	12.5342	0.0657253
0.00802714	5.03e-06	0.0494445	1.83e-06	8.48537	0.0154	SPEX	Analysed on 30 December 2020 at 02:32	34229
0.00811364	9.47e-06	0.0493585	2.09e-06	6.93321	0.0232	TC1725	Analysed on 30 December 2020 at 02:41	34230		-1.76799	12.906	0.0905627	12.729	0.308834
0.00805534	1.01e-05	0.0494473	3.51e-06	8.6227	0.0186	SPEX	Analysed on 30 December 2020 at 02:50	34231
0.00801746	6.21e-06	0.0494356	2.06e-06	8.47232	0.0267	SPEX	Analysed on 30 December 2020 at 03:27	34235
0.00821562	4.65e-06	0.049479	9.02e-07	6.9964	0.0145	SPEX	Analysed on 30 December 2020 at 03:37	34236
0.00818301	3.7e-06	0.0488995	7.64e-07	6.6028	0.0276	ALFA	Analysed on 30 December 2020 at 03:46	34237		-11.7384	2.78903	0.0289002
0.00824886	2.7e-06	0.0494815	7.96e-07	6.99168	0.0162	SPEX	Analysed on 30 December 2020 at 03:55	34238
0.00813154	4.91e-06	0.0488888	1.33e-06	6.66217	0.0212	ALFA	Analysed on 30 December 2020 at 04:04	34239		-11.9129	2.61196	0.0373422
0.00824123	4.36e-06	0.0494749	9.84e-07	6.98188	0.0382	SPEX	Analysed on 30 December 2020 at 04:14	34240
0.00815987	4.19e-06	0.0488903	9.17e-07	6.56278	0.0104	ALFA	Analysed on 30 December 2020 at 04:23	34241		-11.8074	2.71904	0.0365469	2.70668	0.178364
0.0081786	5.08e-06	0.0494741	1.2e-06	6.94592	0.0321	SPEX	Analysed on 30 December 2020 at 04:32	34242
0.00814238	4.92e-06	0.048889	1.16e-06	6.90326	0.011	ALFA	Analysed on 30 December 2020 at 04:41	34243		-11.7582	2.76897	0.0415933
0.00814926	5.29e-06	0.0494672	1.19e-06	6.84093	0.0283	SPEX	Analysed on 30 December 2020 at 04:51	34244
0.00817723	3.64e-06	0.0488928	9.05e-07	6.71	0.0256	ALFA	Analysed on 30 December 2020 at 05:00	34245		-11.5183	3.01237	0.045705
0.00811846	4.42e-06	0.049458	1.69e-06	6.88744	0.0177	SPEX	Analysed on 30 December 2020 at 05:09	34246
0.00816919	3.17e-06	0.0488963	1.04e-06	6.69375	0.0341	ALFA	Analysed on 30 December 2020 at 05:18	34247		-11.4803	3.05092	0.0521441	2.94409	0.305752
0.00815753	6.82e-06	0.0494705	1.64e-06	6.9464	0.0163	SPEX	Analysed on 30 December 2020 at 05:28	34248
0.00814533	2.9e-06	0.0488939	1.04e-06	6.65076	0.0207	ALFA	Analysed on 30 December 2020 at 05:37	34249		-11.5874	2.94228	0.0548764
0.00813385	6.55e-06	0.0494638	1.89e-06	7.18183	0.00491	SPEX	Analysed on 30 December 2020 at 05:46	34250
0.00807898	8.2e-06	0.0488798	2.2e-06	6.65118	0.0218	ALFA	Analysed on 30 December 2020 at 05:55	34251		-11.8732	2.65223	0.0619977
0.00821217	5.06e-06	0.0494705	9.36e-07	7.07725	0.0197	SPEX	Analysed on 30 December 2020 at 06:05	34252
0.00808827	4.55e-06	0.0488807	9.08e-07	6.66104	0.0149	ALFA	Analysed on 30 December 2020 at 06:14	34253		-11.8283	2.69784	0.0554724	2.76411	0.31194
0.00820741	3.69e-06	0.049461	2.41e-06	7.06261	0.0347	SPEX	Analysed on 30 December 2020 at 06:23	34254
0.00801433	4.86e-06	0.04888	1.61e-06	6.7547	0.0123	ALFA	Analysed on 30 December 2020 at 06:32	34255		-11.7648	2.76224	0.0637762
0.00817037	2.82e-06	0.0494627	1.22e-06	7.20955	0.016	SPEX	Analysed on 30 December 2020 at 06:42	34256
0.00802712	5.13e-06	0.0488654	1.91e-06	6.66971	0.0139	ALFA	Analysed on 30 December 2020 at 06:51	34257		-11.9936	2.53013	0.0496133
0.00815353	5.71e-06	0.0494545	8.92e-07	7.1599	0.0269	SPEX	Analysed on 30 December 2020 at 07:00	34258
0.00804131	1.45e-05	0.0488655	3.57e-06	6.48801	0.137	ALFA	Analysed on 30 December 2020 at 07:09	34259		-11.8674	2.65817	0.0954042	2.65018	0.232524
0.00807017	6.66e-06	0.0494503	2.9e-06	7.02275	0.0313	SPEX	Analysed on 30 December 2020 at 07:19	34260
0.00805169	7.31e-06	0.0488651	2.41e-06	6.92428	0.0133	ALFA	Analysed on 30 December 2020 at 07:28	34261		-11.6532	2.87548	0.101628
0.00802275	7.91e-06	0.0494323	3.3e-06	6.97651	0.0103	SPEX	Analysed on 30 December 2020 at 07:37	34262
0.00806467	4.73e-06	0.0488544	1.83e-06	6.9471	0.021	ALFA	Analysed on 30 December 2020 at 07:46	34263		-11.5257	3.00492	0.155173
0.00800194	1.43e-05	0.0494158	6.67e-06	7.0791	0.0177	SPEX	Analysed on 30 December 2020 at 07:56	34264
0.0079766	1.44e-05	0.0488397	5.85e-06	6.80891	0.0245	ALFA	Analysed on 30 December 2020 at 08:05	34265		-11.6493	2.87945	0.189514	2.91995	0.147222
0.00802138	1.2e-05	0.0494149	2.86e-06	7.08929	0.0305	SPEX	Analysed on 30 December 2020 at 08:14	34266
0.00815745	5.01e-06	0.0495445	1.1e-06	7.93127	0.0229	SPEX	Analysed on 30 December 2020 at 08:43	34268
0.00821911	8.12e-06	0.0494499	1.6e-06	7.95562	0.0553	TC1725	Analysed on 30 December 2020 at 08:52	34269		-1.90285	12.7692	0.0455921
0.00808268	3.93e-06	0.0495438	1.15e-06	7.99001	0.0109	SPEX	Analysed on 30 December 2020 at 09:02	34270
0.00819811	6.48e-06	0.0494571	1.84e-06	7.98555	0.0474	TC1725	Analysed on 30 December 2020 at 09:11	34271		-1.80739	12.866	0.0473643
0.00817184	6.76e-06	0.0495495	8.87e-07	8.12031	0.0146	SPEX	Analysed on 30 December 2020 at 09:20	34272
0.00812004	6.67e-06	0.0494595	6.76e-07	8.09702	0.0306	TC1725	Analysed on 30 December 2020 at 09:30	34273		-1.87055	12.8019	0.0286314
0.00817639	5.88e-06	0.0495548	8.76e-07	8.21768	0.0149	SPEX	Analysed on 30 December 2020 at 09:39	34274
0.00811761	5.74e-06	0.0494628	6.99e-07	8.18134	0.0176	TC1725	Analysed on 30 December 2020 at 09:48	34275		-1.71662	12.9581	0.0280864	12.8488	0.166484
0.00820442	3.77e-06	0.049541	8.24e-07	8.03105	0.0522	SPEX	Analysed on 30 December 2020 at 09:57	34276
0.00819276	6.73e-06	0.0494555	8.55e-07	8.24829	0.0152	TC1725	Analysed on 30 December 2020 at 10:06	34277		-1.75294	12.9213	0.0322795
0.00826508	2.3e-06	0.0495437	1.07e-06	8.94421	0.0182	SPEX	Analysed on 30 December 2020 at 10:35	34278
0.00819394	2.81e-06	0.049454	8.83e-07	8.46323	0.0174	TC1725	Analysed on 30 December 2020 at 10:44	34279		-1.92129	12.7505	0.0385235
0.00826213	3.04e-06	0.0495548	1.31e-06	9.14762	0.0296	SPEX	Analysed on 30 December 2020 at 10:53	34280
0.00816994	2.1e-06	0.0494542	9.82e-07	8.50215	0.0185	TC1725	Analysed on 30 December 2020 at 11:03	34281		-1.92521	12.7465	0.039491
0.00827663	2.76e-06	0.0495445	1.07e-06	8.82403	0.0318	SPEX	Analysed on 30 December 2020 at 11:12	34282
0.00825371	4.25e-06	0.0494651	1.11e-06	8.42269	0.0229	TC1725	Analysed on 30 December 2020 at 11:21	34283		-1.72994	12.9446	0.0398247	12.8407	0.213894
0.00824556	2.63e-06	0.049557	1.23e-06	8.74432	0.0257	SPEX	Analysed on 30 December 2020 at 11:30	34284
0.00827875	2.61e-06	0.0495559	8.58e-07	5.49963	0.0893	SPEX	Analysed on 30 December 2020 at 14:43	34288
0.00826519	1.34e-06	0.0494653	7.56e-07	6.245	0.0482	TC1725	Analysed on 30 December 2020 at 14:53	34289		-1.83116	12.8419	0.0337553
0.00828058	2.84e-06	0.0495562	1.22e-06	5.63864	0.0451	SPEX	Analysed on 30 December 2020 at 15:02	34290
0.00821137	1.89e-06	0.0494619	9.31e-07	6.69581	0.0291	TC1725	Analysed on 30 December 2020 at 15:11	34291		-1.88295	12.7894	0.0353228
0.00826237	1.9e-06	0.0495542	8.4e-07	6.38363	0.0344	SPEX	Analysed on 30 December 2020 at 15:20	34292
0.00818156	7.51e-06	0.049471	1.19e-06	7.01352	0.0542	TC1725	Analysed on 30 December 2020 at 15:30	34293		-1.77012	12.9039	0.0330623
0.00817236	4.15e-06	0.0495633	7.47e-07	6.73474	0.0276	SPEX	Analysed on 30 December 2020 at 15:39	34294
0.0081308	1.25e-05	0.0494702	1.77e-06	7.34856	0.0455	TC1725	Analysed on 30 December 2020 at 15:48	34295		-1.81587	12.8574	0.0523458	12.8481	0.0943998
0.00815298	1.24e-05	0.0495571	1.74e-06	6.78872	0.0784	SPEX	Analysed on 30 December 2020 at 15:57	34296
0.00817012	4.31e-06	0.0494691	1.02e-06	7.55188	0.0475	TC1725	Analysed on 30 December 2020 at 16:07	34297		-2.08171	12.5877	0.0451727
0.00816706	6.11e-06	0.0495875	9.7e-07	8.66269	0.0741	SPEX	Analysed on 30 December 2020 at 16:16	34298
0.00812136	1.15e-05	0.0494873	1.98e-06	7.3598	0.0612	TC1725	Analysed on 30 December 2020 at 16:25	34299		-1.88984	12.7824	0.0493161
0.00820637	4.69e-06	0.0495744	1.05e-06	8.78331	0.04	SPEX	Analysed on 30 December 2020 at 16:34	34300
0.00819476	7.87e-06	0.0494667	8.74e-07	7.02994	0.057	TC1725	Analysed on 30 December 2020 at 16:44	34301		-2.10425	12.5648	0.0329888
0.00823506	2e-06	0.0495676	8.97e-07	8.36469	0.0516	SPEX	Analysed on 30 December 2020 at 16:53	34302
0.00822437	4.92e-06	0.0494631	1.01e-06	7.29307	0.0419	TC1725	Analysed on 30 December 2020 at 17:02	34303		-2.10662	12.5624	0.0307224	12.6243	0.211971
0.00824214	2.79e-06	0.0495673	7e-07	8.02564	0.0522	SPEX	Analysed on 30 December 2020 at 17:11	34304
0.00824971	5.18e-06	0.0494589	9.86e-07	7.0447	0.0905	TC1725	Analysed on 30 December 2020 at 17:21	34305		-2.17716	12.4908	0.0307063
0.00824702	4.23e-06	0.0495664	9.22e-07	7.99759	0.0725	SPEX	Analysed on 30 December 2020 at 17:30	34306
0.00825663	3.92e-06	0.049456	1.02e-06	6.962	0.0817	TC1725	Analysed on 30 December 2020 at 17:39	34307		-2.0739	12.5956	0.0341544
0.00826538	4.11e-06	0.0495513	9.85e-07	8.37419	0.0318	SPEX	Analysed on 30 December 2020 at 17:48	34308
0.00822897	3.55e-06	0.0494621	7.67e-07	6.99281	0.0321	TC1725	Analysed on 30 December 2020 at 17:58	34309		-1.84507	12.8278	0.0334576
0.00827535	2.51e-06	0.0495558	1.09e-06	7.94063	0.0768	SPEX	Analysed on 30 December 2020 at 18:07	34310
0.00823867	7.61e-06	0.0494498	1.05e-06	7.36581	0.0568	TC1725	Analysed on 30 December 2020 at 18:16	34311		-2.10457	12.5645	0.035356	12.6197	0.29107
0.00823219	4.44e-06	0.0495523	8.8e-07	8.42039	0.0544	SPEX	Analysed on 30 December 2020 at 18:25	34312
0.00824196	2.78e-06	0.049451	8.95e-07	7.21799	0.052	TC1725	Analysed on 30 December 2020 at 18:35	34313		-2.02225	12.648	0.0274966
0.00823636	5.24e-06	0.0495501	5.27e-07	8.97138	0.0257	SPEX	Analysed on 30 December 2020 at 18:44	34314
0.00818282	7.08e-06	0.049448	6.77e-07	7.46565	0.0609	TC1725	Analysed on 30 December 2020 at 18:53	34315		-2.0408	12.6292	0.0240796
0.00825488	1.14e-06	0.0495481	8.28e-07	8.52101	0.0504	SPEX	Analysed on 30 December 2020 at 19:02	34316
0.00819712	4.37e-06	0.0494419	1.1e-06	7.47889	0.0302	TC1725	Analysed on 30 December 2020 at 19:12	34317		-2.11669	12.5522	0.03205
0.00824076	1.87e-06	0.0495454	7.88e-07	8.57984	0.0502	SPEX	Analysed on 30 December 2020 at 19:21	34318
0.00821268	4.86e-06	0.0494431	6.65e-07	7.79609	0.0387	TC1725	Analysed on 30 December 2020 at 19:30	34319		-2.07494	12.5946	0.0274917	12.606	0.0842988
0.00821453	6.4e-06	0.0495464	8.89e-07	8.62835	0.0357	SPEX	Analysed on 30 December 2020 at 19:39	34320
0.00820805	1.9e-06	0.0494459	8.68e-07	7.5341	0.0423	TC1725	Analysed on 30 December 2020 at 19:49	34321		-1.97462	12.6964	0.0301123
0.00825014	5.26e-06	0.0495411	8.24e-07	8.85364	0.0372	SPEX	Analysed on 30 December 2020 at 19:58	34322
0.00816506	4.69e-06	0.0494392	8.3e-07	7.63149	0.0221	TC1725	Analysed on 30 December 2020 at 20:07	34323		-2.12989	12.5388	0.0282289
0.00821687	2.05e-06	0.0495484	7.65e-07	8.66341	0.0336	SPEX	Analysed on 30 December 2020 at 20:16	34324
0.00816374	9.72e-06	0.0494374	1.56e-06	7.97271	0.0389	TC1725	Analysed on 30 December 2020 at 20:26	34325		-2.18405	12.4838	0.0369784
0.00817152	6.73e-06	0.0495428	5.72e-07	8.75854	0.0406	SPEX	Analysed on 30 December 2020 at 20:35	34326
0.00812965	1.18e-05	0.049432	1.89e-06	7.80355	0.0305	TC1725	Analysed on 30 December 2020 at 20:44	34327		-2.23584	12.4313	0.043164	12.5376	0.229191
0.00816438	2.57e-06	0.0495429	8.11e-07	8.8309	0.038	SPEX	Analysed on 30 December 2020 at 20:53	34328
0.00818504	7.99e-06	0.0494382	1.14e-06	7.84755	0.0353	TC1725	Analysed on 30 December 2020 at 21:03	34329		-2.10506	12.564	0.0317854
0.00812283	4.16e-06	0.0495421	7.19e-07	8.89662	0.02	SPEX	Analysed on 30 December 2020 at 21:12	34330
0.00815848	2.43e-06	0.0494345	6.49e-07	7.96715	0.0358	TC1725	Analysed on 30 December 2020 at 21:21	34331		-2.16655	12.5016	0.0237196
0.0081653	8.18e-06	0.0495415	6.64e-07	8.93895	0.0166	SPEX	Analysed on 30 December 2020 at 21:30	34332
0.00803047	5.85e-06	0.0494386	1.35e-06	7.99564	0.0269	TC1725	Analysed on 30 December 2020 at 21:40	34333		-2.05287	12.6169	0.0337999
0.00821157	6.61e-06	0.0495391	7.3e-07	8.98255	0.0413	SPEX	Analysed on 30 December 2020 at 21:49	34334
0.0080378	9.15e-06	0.0494277	2.11e-06	7.90545	0.017	TC1725	Analysed on 30 December 2020 at 21:58	34335		-2.20371	12.4639	0.0484555	12.5366	0.135241
0.00820467	2.22e-06	0.0495347	8.7e-07	8.94432	0.0435	SPEX	Analysed on 30 December 2020 at 22:07	34336
0.00829349	1.31e-06	0.0495449	8.3e-07	8.3298	0.0107	SPEX	Analysed on 31 December 2020 at 10:31	34384
0.00827509	8.82e-07	0.0494415	7.25e-07	6.18577	0.0092	TC1725	Analysed on 31 December 2020 at 10:41	34385		-1.86942	12.8031	0.0262854
0.00832539	5.06e-07	0.0495233	6.92e-07	8.2124	0.0233	SPEX	Analysed on 31 December 2020 at 10:50	34386
0.0083144	6.59e-07	0.0494121	8.23e-07	6.00717	0.0192	TC1725	Analysed on 31 December 2020 at 11:00	34387		-2.10678	12.5623	0.0247637
0.00833817	3.3e-07	0.0495095	5.87e-07	8.18352	0.0157	SPEX	Analysed on 31 December 2020 at 11:09	34388
0.00832537	6.62e-07	0.049395	1.15e-06	6.34607	0.0164	TC1725	Analysed on 31 December 2020 at 11:19	34389		-2.0942	12.575	0.0337846
0.00833736	3.29e-07	0.0494878	1.06e-06	8.01459	0.0127	SPEX	Analysed on 31 December 2020 at 11:29	34390
0.00832238	4.89e-07	0.0493738	2.32e-06	6.16202	0.0371	TC1725	Analysed on 31 December 2020 at 11:38	34391		-2.19785	12.4698	0.0541731	12.6026	0.283345
0.00833338	4.35e-07	0.0494772	8.1e-07	8.31184	0.0105	SPEX	Analysed on 31 December 2020 at 11:48	34392
0.00832065	4.85e-07	0.0493666	1.29e-06	6.30039	0.0388	TC1725	Analysed on 31 December 2020 at 11:57	34393		-1.85217	12.8206	0.0494306
0.00832713	4.5e-07	0.0494392	1.91e-06	7.81951	0.0787	SPEX	Analysed on 31 December 2020 at 12:07	34394
0.00831751	6.05e-07	0.0493292	1.69e-06	6.65737	0.00953	TC1725	Analysed on 31 December 2020 at 12:16	34395		-2.02158	12.6487	0.0837724
0.00832423	7.68e-07	0.0494191	3.26e-06	7.99632	0.0489	SPEX	Analysed on 31 December 2020 at 12:26	34396
0.00831221	5.87e-07	0.0493184	2.64e-06	6.39122	0.0346	TC1725	Analysed on 31 December 2020 at 12:36	34397		-2.20192	12.4657	0.108042
0.00832673	4.98e-07	0.0494354	3.3e-06	8.22364	0.0231	SPEX	Analysed on 31 December 2020 at 12:45	34398
0.00830898	6.75e-07	0.0493128	2.99e-06	6.5679	0.0209	TC1725	Analysed on 31 December 2020 at 12:55	34399		-1.91399	12.7579	0.103124	12.6732	0.311022
0.00831785	5.65e-07	0.0493793	2.47e-06	8.51909	0.018	SPEX	Analysed on 31 December 2020 at 13:04	34400
0.00831043	6.7e-07	0.0492986	1.82e-06	6.75249	0.012	TC1725	Analysed on 31 December 2020 at 13:14	34401		-1.65744	13.0182	0.0663879
0.00831386	5.15e-07	0.0493816	1.15e-06	8.37353	0.0203	SPEX	Analysed on 31 December 2020 at 13:24	34402
0.00830593	5.01e-07	0.0492862	1.35e-06	7.1002	0.0147	TC1725	Analysed on 31 December 2020 at 13:33	34403		-1.79626	12.8773	0.058528
0.00831471	6.77e-07	0.0493682	2.28e-06	8.74152	0.0125	SPEX	Analysed on 31 December 2020 at 13:43	34404
0.00830273	7.31e-07	0.0492707	3.3e-06	7.05901	0.0142	TC1725	Analysed on 31 December 2020 at 13:52	34405		-1.84404	12.8289	0.0937575
0.00830855	1.33e-06	0.0493553	2.3e-06	8.76329	0.0221	SPEX	Analysed on 31 December 2020 at 14:02	34406
0.00829419	4.65e-07	0.0492272	2.94e-06	6.87601	0.0351	TC1725	Analysed on 31 December 2020 at 14:11	34407		-1.99602	12.6746	0.0981946	12.8498	0.283399
0.00829659	7.11e-07	0.0492961	3.08e-06	8.82162	0.0245	SPEX	Analysed on 31 December 2020 at 14:21	34408
0.00829957	1.37e-06	0.0494729	1.49e-06	9.62846	0.0322	SPEX	Analysed on 31 December 2020 at 14:34	34409
0.00826461	2.17e-06	0.0493887	9.2e-07	7.56735	0.0139	TC1725	Analysed on 31 December 2020 at 14:44	34410		-1.85054	12.8223	0.0407623
0.00828983	1.15e-06	0.0494877	9.99e-07	9.41973	0.0398	SPEX	Analysed on 31 December 2020 at 14:53	34411
0.00828727	1.43e-06	0.0493793	1.1e-06	7.43935	0.0237	TC1725	Analysed on 31 December 2020 at 15:02	34412		-2.12531	12.5434	0.0358013
0.00829059	2.34e-06	0.0494813	9.62e-07	9.58593	0.0093	SPEX	Analysed on 31 December 2020 at 15:11	34413
0.00826566	9.03e-07	0.0493873	6.49e-07	7.47097	0.0193	TC1725	Analysed on 31 December 2020 at 15:21	34414		-1.84433	12.8286	0.0279696
0.00830796	5.02e-07	0.0494758	7.53e-07	9.68068	0.0377	SPEX	Analysed on 31 December 2020 at 15:30	34415
0.00826155	1.3e-06	0.0493868	8.24e-07	7.53709	0.0193	TC1725	Analysed on 31 December 2020 at 15:39	34416		-1.85111	12.8217	0.0275178	12.754	0.280789
0.00829937	6.25e-07	0.0494809	7.78e-07	9.56613	0.0577	SPEX	Analysed on 31 December 2020 at 15:48	34417
0.00826501	1.57e-06	0.0493869	6.76e-07	7.672	0.0157	TC1725	Analysed on 31 December 2020 at 15:58	34418		-1.95368	12.7176	0.0315208
0.00828662	1.24e-06	0.0494863	1.17e-06	9.54535	0.0316	SPEX	Analysed on 31 December 2020 at 16:07	34419
0.00828352	8.37e-07	0.0493795	8.02e-07	7.74092	0.0383	TC1725	Analysed on 31 December 2020 at 16:16	34420		-2.07166	12.5979	0.0418828
0.00829615	9.7e-07	0.0494778	1.51e-06	10.0169	0.0159	SPEX	Analysed on 31 December 2020 at 16:25	34421
0.00826616	9.6e-07	0.0493852	6.72e-07	7.72604	0.0106	TC1725	Analysed on 31 December 2020 at 16:35	34422		-1.82454	12.8486	0.0401362
0.00830205	1.11e-06	0.0494732	1.1e-06	10.0219	0.0386	SPEX	Analysed on 31 December 2020 at 16:44	34423
0.00827662	2.42e-06	0.0493813	7.14e-07	8.01098	0.013	TC1725	Analysed on 31 December 2020 at 16:53	34424		-1.9655	12.7056	0.0292215	12.7174	0.205415
0.00829576	5.64e-07	0.0494838	6.07e-07	9.85466	0.0183	SPEX	Analysed on 31 December 2020 at 17:02	34425
0.00828222	1.12e-06	0.0493948	8.25e-07	9.86216	0.0311	TC1725	Analysed on 31 December 2020 at 17:12	34426		-1.82358	12.8496	0.023758
0.00829274	5.87e-07	0.0494863	5.75e-07	9.7106	0.013	SPEX	Analysed on 31 December 2020 at 17:21	34427
0.00827357	1.2e-06	0.049394	7e-07	9.72138	0.0247	TC1725	Analysed on 31 December 2020 at 17:30	34428		-1.87844	12.7939	0.0505233
0.00830743	1.34e-06	0.0494876	2.33e-06	9.75211	0.027	SPEX	Analysed on 31 December 2020 at 17:39	34429
0.00825704	1.29e-06	0.049394	5.44e-07	9.72714	0.0114	TC1725	Analysed on 31 December 2020 at 17:49	34430		-1.78281	12.891	0.0514239
0.00829855	8.12e-07	0.0494769	8.66e-07	9.77661	0.0284	SPEX	Analysed on 31 December 2020 at 17:58	34431
0.00826628	1.8e-06	0.0494	4.69e-07	10.2378	0.0115	TC1725	Analysed on 31 December 2020 at 18:07	34432		-1.66867	13.0068	0.0259045	12.8853	0.180425
0.00828346	1.14e-06	0.0494883	8.2e-07	10.0816	0.00757	SPEX	Analysed on 31 December 2020 at 18:16	34433
0.00826073	1.45e-06	0.0494019	1.04e-06	10.0241	0.0336	TC1725	Analysed on 31 December 2020 at 18:26	34434		-1.73937	12.9351	0.040757
0.00830715	7.02e-07	0.0494875	1.52e-06	10.2531	0.0162	SPEX	Analysed on 31 December 2020 at 18:35	34435
0.00824993	1.5e-06	0.049402	4.91e-07	10.0651	0.00967	TC1725	Analysed on 31 December 2020 at 18:44	34436		-1.67098	13.0045	0.033969
0.00830787	1.22e-06	0.0494819	5.23e-07	9.94244	0.0519	SPEX	Analysed on 31 December 2020 at 18:53	34437
0.0082788	1.62e-06	0.0493948	4.9e-07	10.3814	0.0169	TC1725	Analysed on 31 December 2020 at 19:03	34438		-1.82429	12.8489	0.018377
0.00829463	1.36e-06	0.0494882	5.59e-07	10.0293	0.0139	SPEX	Analysed on 31 December 2020 at 19:12	34439
0.00827233	1.16e-06	0.0493986	8.44e-07	9.88879	0.024	TC1725	Analysed on 31 December 2020 at 19:21	34440		-1.72611	12.9485	0.0272588	12.9342	0.128678
0.00831093	8.12e-07	0.0494798	8.9e-07	10.1712	0.0174	SPEX	Analysed on 31 December 2020 at 19:30	34441
0.00826278	1.87e-06	0.0494007	6.3e-07	9.9314	0.0142	TC1725	Analysed on 31 December 2020 at 19:40	34442		-1.65694	13.0187	0.0239602
0.00830781	3.31e-07	0.0494856	4.64e-07	9.84086	0.0218	SPEX	Analysed on 31 December 2020 at 19:49	34443
0.00829521	1.26e-06	0.0493943	6.49e-07	10.0753	0.0175	TC1725	Analysed on 31 December 2020 at 19:58	34444		-1.84569	12.8272	0.0222527
0.00830566	7.65e-07	0.0494856	7.58e-07	9.92164	0.00699	SPEX	Analysed on 31 December 2020 at 20:07	34445
0.00826287	1.39e-06	0.0493906	7.68e-07	9.7487	0.0144	TC1725	Analysed on 31 December 2020 at 20:21	34446		-1.94019	12.7313	0.0317345
0.0083125	7.46e-07	0.0494876	1.14e-06	9.88007	0.0457	SPEX	Analysed on 31 December 2020 at 20:31	34447
0.00826804	1.75e-06	0.0494027	6.27e-07	10.0504	0.0102	TC1725	Analysed on 31 December 2020 at 20:40	34448		-1.7123	12.9625	0.0306518	12.8849	0.260403
0.00829653	7.79e-07	0.0494873	7.79e-07	10.0346	0.0107	SPEX	Analysed on 31 December 2020 at 20:49	34449
0.00828822	1.19e-06	0.0493954	1.13e-06	10.0453	0.0279	TC1725	Analysed on 31 December 2020 at 20:58	34450		-1.80046	12.8731	0.0382279
0.00830209	1.29e-06	0.0494816	1.3e-06	10.0075	0.0128	SPEX	Analysed on 31 December 2020 at 21:08	34451
0.00825935	6.83e-07	0.0493905	7.25e-07	9.89357	0.0234	TC1725	Analysed on 31 December 2020 at 21:17	34452		-1.86009	12.8126	0.0351745
0.00830752	5.28e-07	0.0494835	9.01e-07	10.153	0.0371	SPEX	Analysed on 31 December 2020 at 21:26	34453
0.00826103	2.17e-06	0.0493956	5.88e-07	10.1329	0.0148	TC1725	Analysed on 31 December 2020 at 21:35	34454		-1.89848	12.7736	0.0254735
0.008292	5.45e-07	0.0494957	6.56e-07	9.99975	0.0193	SPEX	Analysed on 31 December 2020 at 21:45	34455
0.00824967	1.03e-06	0.0493941	6.13e-07	9.9682	0.00732	TC1725	Analysed on 31 December 2020 at 21:54	34456		-1.99158	12.6791	0.0240301	12.7846	0.162691
0.00829853	7.79e-07	0.0494897	7.79e-07	10.1346	0.0107	SPEX	Analysed on 31 December 2020 at 22:03	34457
0.00832551	5.57e-07	0.0495854	6.83e-07	10.1855	0.045	spex	Analysed on 04 January 2021 at 10:38	34497
0.00834154	1.03e-06	0.0499612	1.07e-06	8.95663	0.0182	IAEA-S2	Analysed on 04 January 2021 at 10:48	34498		7.61654	22.4285	0.0287612
0.00832446	5.28e-07	0.0495816	6.63e-07	10.2974	0.0203	spex	Analysed on 04 January 2021 at 10:58	34499										δ34Svcdt	2s
0.00835496	1.07e-06	0.0499517	9.06e-07	8.96282	0.0124	IAEA-S2	Analysed on 04 January 2021 at 11:08	34500		7.49321	22.3034	0.0250369						22.4285	0.0575225
0.00832467	5.26e-07	0.0495788	5.41e-07	10.4104	0.0266	spex	Analysed on 04 January 2021 at 11:17	34501										22.3034	0.0500738
0.00835802	6.62e-07	0.0499345	5.61e-07	9.08626	0.0268	IAEA-S2	Analysed on 04 January 2021 at 11:27	34502		7.70422	22.5175	0.0328475						22.5175	0.065695
0.0083041	1.48e-05	0.0495266	1.43e-06	10.115	0.105	spex	Analysed on 04 January 2021 at 11:37	34503										22.6426	0.0675467
0.00836927	4.89e-07	0.0499366	6.61e-07	8.84128	0.0442	IAEA-S2	Analysed on 04 January 2021 at 11:51	34504		7.82755	22.6426	0.0337734	22.473	0.286366				22.1742	0.0611434
0.00832421	6.03e-07	0.0495708	5.69e-07	10.621	0.0196	spex	Analysed on 04 January 2021 at 12:01	34505										22.1852	0.0412563
0.00814121	5.07e-07	0.0472612	9.42e-07	10.4034	0.0781	IAEA-S3	Analysed on 04 January 2021 at 12:11	34506		-46.5478	-32.532	0.0251562						22.1796	0.0501949
0.00832784	4.65e-07	0.0495662	5.05e-07	10.6158	0.0157	spex	Analysed on 04 January 2021 at 12:21	34507										22.2704	0.0647979
0.0081328	4.02e-07	0.0472615	4.46e-07	11.0254	0.0338	IAEA-S3	Analysed on 04 January 2021 at 12:30	34508		-46.4495	-32.4323	0.0191569						22.3377	0.349908
0.00832749	8.18e-07	0.0495613	6.54e-07	10.9082	0.0149	spex	Analysed on 04 January 2021 at 12:40	34509
0.00813506	5.39e-07	0.0472577	5.32e-07	11.1759	0.0494	IAEA-S3	Analysed on 04 January 2021 at 12:50	34510		-46.4313	-32.4139	0.0224972
0.00833092	7.39e-07	0.0495563	7.1e-07	11.1336	0.0164	spex	Analysed on 04 January 2021 at 12:59	34511
0.00812946	4.99e-07	0.0472594	6.27e-07	11.4673	0.0292	IAEA-S3	Analysed on 04 January 2021 at 13:09	34512		-46.1657	-32.1443	0.0340198	-32.3806	0.331729
0.00833229	6.25e-07	0.0495371	1.38e-06	10.8879	0.0303	spex	Analysed on 04 January 2021 at 13:19	34513
0.00828276	1.84e-06	0.0495695	8.06e-07	9.27324	0.0425	spex	Analysed on 04 January 2021 at 14:00	34516
0.00832125	2.53e-06	0.0499315	1.15e-06	9.20247	0.00833	IAEA-S2	Analysed on 04 January 2021 at 14:09	34517		7.36588	22.1742	0.0305717
0.00827738	9.1e-07	0.0495632	5.86e-07	9.65568	0.0267	spex	Analysed on 04 January 2021 at 14:19	34518
0.00832421	1.04e-06	0.0499269	7.04e-07	9.34586	0.012	IAEA-S2	Analysed on 04 January 2021 at 14:29	34519		7.37672	22.1852	0.0206281
0.00827376	1.07e-06	0.0495594	4.62e-07	9.84732	0.0104	spex	Analysed on 04 January 2021 at 14:39	34520										δ34Svcdt	2s
0.00832768	1.52e-06	0.0499251	8.39e-07	9.44393	0.0221	IAEA-S2	Analysed on 04 January 2021 at 14:48	34521		7.3712	22.1796	0.0250974						-32.532	0.0503125
0.00828125	1.44e-06	0.0495601	8e-07	9.7945	0.0214	spex	Analysed on 04 January 2021 at 14:58	34522										-32.4323	0.0383138
0.00830987	1.42e-06	0.0499284	7.11e-07	9.33393	0.0125	IAEA-S2	Analysed on 04 January 2021 at 15:08	34523		7.46075	22.2704	0.0323989	22.2023	0.0912393				-32.4139	0.0449944
0.0082808	1.96e-06	0.0495573	1.2e-06	9.92169	0.011	spex	Analysed on 04 January 2021 at 15:18	34524										-32.1443	0.0680396
0.0080747	2e-06	0.0472667	1.02e-06	11.2225	0.0194	IAEA-S3	Analysed on 04 January 2021 at 15:27	34525		-46.217	-32.1964	0.0350857						-32.1964	0.0701714
0.00828798	9.63e-07	0.0495569	6.63e-07	10.0199	0.00844	spex	Analysed on 04 January 2021 at 15:37	34526										-32.1318	0.058611
0.00808194	1e-06	0.047265	7.86e-07	11.192	0.028	IAEA-S3	Analysed on 04 January 2021 at 15:47	34527		-46.1533	-32.1318	0.0293055						-32.3532	0.0695949
0.00830122	1.45e-06	0.0495472	9.95e-07	9.99342	0.0227	spex	Analysed on 04 January 2021 at 15:57	34528										-32.2667	0.0576364
0.0080885	2.43e-06	0.047259	1.24e-06	11.2415	0.0527	IAEA-S3	Analysed on 04 January 2021 at 16:06	34529		-46.3716	-32.3532	0.0347975						-32.3088	0.293641
0.00825772	1.13e-06	0.0495668	5.41e-07	10.3104	0.0114	spex	Analysed on 04 January 2021 at 16:16	34530
0.00808585	2.13e-06	0.0472617	8.84e-07	11.5919	0.0341	IAEA-S3	Analysed on 04 January 2021 at 16:26	34531		-46.2863	-32.2667	0.0288182	-32.237	0.190145
0.00831032	1.51e-06	0.0495441	9.42e-07	10.0065	0.0435	spex	Analysed on 04 January 2021 at 16:36	34532
0.00846217	4.18e-07	0.0504496	9.74e-07	8.90076	0.0112	Spex	Analysed on 12 January 2021 at 14:44	34784
0.00840888	3.93e-07	0.0498459	2.86e-06	8.26723	0.0276	alfa	Analysed on 12 January 2021 at 14:53	34785		-12.0469	2.47603	0.0640793	alfa S 参考值 2.93
0.00846505	3.38e-07	0.0504578	1.06e-06	8.68745	0.0113	Spex	Analysed on 12 January 2021 at 15:02	34786
0.00841124	4.84e-07	0.049863	1.56e-06	8.09685	0.0044	alfa	Analysed on 12 January 2021 at 15:11	34787		-11.9299	2.5947	0.0422931
0.00846158	4.91e-07	0.0504723	9.69e-07	8.47197	0.0125	Spex	Analysed on 12 January 2021 at 15:20	34788
0.00841267	4.34e-07	0.0498671	1.98e-06	8.06681	0.0106	alfa	Analysed on 12 January 2021 at 15:29	34789		-12	2.52356	0.0475792
0.00846298	4.58e-07	0.0504731	9.01e-07	8.48924	0.0118	Spex	Analysed on 12 January 2021 at 15:38	34790
0.00840928	5.34e-07	0.0498739	1.17e-06	8.04057	0.00303	alfa	Analysed on 12 January 2021 at 15:47	34791		-11.9228	2.60198	0.0378699	2.54907	0.120371
0.00846281	4.44e-07	0.0504783	1.2e-06	8.38676	0.00506	Spex	Analysed on 12 January 2021 at 15:56	34792
0.00853831	1.14e-06	0.0504162	2.18e-06	9.54741	0.0302	Spex	Analysed on 12 January 2021 at 17:47	34802
0.00848794	7.64e-07	0.0498243	1.41e-06	9.11349	0.0193	alfa	Analysed on 12 January 2021 at 17:56	34803		-11.804	2.7225	0.0675054
0.00854091	1.08e-06	0.0504226	2.19e-06	9.5764	0.0347	Spex	Analysed on 12 January 2021 at 18:05	34804
0.00848584	9.6e-07	0.0498209	1.46e-06	8.99765	0.0212	alfa	Analysed on 12 January 2021 at 18:14	34805		-12	2.52365	0.0565278
0.00854126	4.62e-07	0.0504294	1.07e-06	9.57702	0.0151	Spex	Analysed on 12 January 2021 at 18:23	34806
0.00848773	7.56e-07	0.0498264	1.65e-06	9.00352	0.0216	alfa	Analysed on 12 January 2021 at 18:32	34807		-12.0082	2.51524	0.0477982
0.00854138	7.91e-07	0.0504346	1.37e-06	9.58081	0.00819	Spex	Analysed on 12 January 2021 at 18:41	34808
0.0084864	8.34e-07	0.0498363	1.41e-06	8.99922	0.0212	alfa	Analysed on 12 January 2021 at 18:50	34809		-11.8356	2.69046	0.0467176	2.61296	0.217659
0.0085364	4.96e-07	0.0504318	1.28e-06	9.51265	0.02	Spex	Analysed on 12 January 2021 at 18:59	34810
0.00848236	8.36e-07	0.0498381	1.53e-06	8.94059	0.0182	alfa	Analysed on 12 January 2021 at 19:08	34811		-11.8075	2.71893	0.0537477
0.00853855	8e-07	0.0504355	1.82e-06	9.46123	0.0143	Spex	Analysed on 12 January 2021 at 19:18	34812
0.00848392	7.49e-07	0.0498428	1.67e-06	8.97813	0.0168	alfa	Analysed on 12 January 2021 at 19:27	34813		-11.7474	2.77988	0.0518444
0.00853284	5.07e-07	0.0504351	8.18e-07	9.45616	0.0133	Spex	Analysed on 12 January 2021 at 19:36	34814
0.00848131	6.95e-07	0.0498386	1.37e-06	8.91393	0.0193	alfa	Analysed on 12 January 2021 at 19:45	34815		-11.9266	2.59808	0.0359446
0.00853771	4.46e-07	0.0504453	8.34e-07	9.43324	0.0117	Spex	Analysed on 12 January 2021 at 19:54	34816
0.00848525	3.15e-07	0.0498444	1.38e-06	8.86343	0.0108	alfa	Analysed on 12 January 2021 at 20:03	34817		-11.8992	2.62591	0.0428051	2.6807	0.167838
0.00853794	4.94e-07	0.0504441	1.42e-06	9.40091	0.00923	Spex	Analysed on 12 January 2021 at 20:12	34818
0.00848118	6.42e-07	0.0498439	1.48e-06	8.86294	0.0131	alfa	Analysed on 12 January 2021 at 20:21	34819		-11.8732	2.65222	0.0423949
0.00853444	5.28e-07	0.0504416	5.6e-07	9.52523	0.00737	Spex	Analysed on 12 January 2021 at 20:30	34820
0.00848248	5.98e-07	0.0498534	8.5e-07	8.94602	0.00336	alfa	Analysed on 12 January 2021 at 20:39	34821		-11.7697	2.75733	0.0363539
0.0085371	5.15e-07	0.0504526	1.52e-06	9.50835	0.0102	Spex	Analysed on 12 January 2021 at 20:48	34822
0.00847827	4.71e-07	0.0498402	1.26e-06	8.75631	0.0126	alfa	Analysed on 12 January 2021 at 20:57	34823		-11.7182	2.80958	0.0487254
0.0085229	6.22e-07	0.0504096	1.45e-06	9.10449	0.0348	Spex	Analysed on 12 January 2021 at 21:06	34824
0.00848527	3.9e-07	0.0498496	7.37e-07	8.95266	0.0313	alfa	Analysed on 12 January 2021 at 21:15	34825		-11.4843	3.04686	0.0395679	2.8165	0.333866
0.00853596	4.16e-07	0.0504479	1.15e-06	9.40328	0.0338	Spex	Analysed on 12 January 2021 at 21:25	34826
0.00855001	5.56e-07	0.0504728	1.08e-06	9.31802	0.0173	Spex	Analysed on 12 January 2021 at 22:19	34832
0.00849153	9.9e-07	0.0498765	1.36e-06	8.88892	0.00365	alfa	Analysed on 12 January 2021 at 22:28	34833		-11.8095	2.71693	0.0361936
0.00854845	4.73e-07	0.0504722	5.26e-07	9.34303	0.00896	Spex	Analysed on 12 January 2021 at 22:37	34834
0.00849713	4.85e-07	0.0498769	9.25e-07	8.80527	0.00655	alfa	Analysed on 12 January 2021 at 22:46	34835		-11.7294	2.79816	0.0274691
0.00854597	5.09e-07	0.0504655	8.77e-07	9.24438	0.00916	Spex	Analysed on 12 January 2021 at 22:55	34836
0.00848694	4.94e-07	0.049863	9.67e-07	8.65579	0.0224	alfa	Analysed on 12 January 2021 at 23:04	34837		-11.7775	2.74938	0.0402749
0.00854303	6.91e-07	0.050449	1.55e-06	9.23957	0.0209	Spex	Analysed on 12 January 2021 at 23:13	34838
0.00849519	4.79e-07	0.0498586	1.08e-06	8.849	0.0328	alfa	Analysed on 12 January 2021 at 23:22	34839		-11.727	2.80062	0.0610987	2.76627	0.0809691
0.00854442	1.11e-06	0.0504515	2.43e-06	9.26778	0.0199	Spex	Analysed on 12 January 2021 at 23:31	34840
0.00859054	5.11e-07	0.0505038	6.79e-07	8.47048	0.00825	spex	Analysed on 13 January 2021 at 19:23	34895
0.00857867	4.08e-07	0.0504124	1.15e-06	8.60315	0.0103	tc1725	Analysed on 13 January 2021 at 19:32	34896		-1.86313	12.8095	0.0304165
0.00858776	2.49e-07	0.0505093	7.56e-07	8.13577	0.00637	spex	Analysed on 13 January 2021 at 19:41	34897
0.00857325	4.93e-07	0.0504217	6.92e-07	8.32633	0.00472	tc1725	Analysed on 13 January 2021 at 19:50	34898		-1.85439	12.8184	0.0269093
0.00858288	5.4e-07	0.0505214	8.92e-07	7.92772	0.00456	spex	Analysed on 13 January 2021 at 19:58	34899
0.00857128	5.15e-07	0.0504311	8.14e-07	8.05114	0.00637	tc1725	Analysed on 13 January 2021 at 20:06	34900		-1.79754	12.876	0.0274483
0.00858164	4.48e-07	0.0505225	6.8e-07	7.69912	0.00552	spex	Analysed on 13 January 2021 at 20:15	34901
0.00857373	4.42e-07	0.0504223	7.91e-07	8.07689	0.01	tc1725	Analysed on 13 January 2021 at 20:23	34902		-2.02278	12.6475	0.0249831	12.7878	0.196225
0.00858219	3.63e-07	0.0505266	7.09e-07	7.64575	0.00847	spex	Analysed on 13 January 2021 at 20:31	34903
0.00858511	4.21e-07	0.050527	9.11e-07	8.83534	0.00598	spex	Analysed on 13 January 2021 at 21:09	34904
0.0085654	6.03e-07	0.0504362	8.22e-07	7.75065	0.0102	tc1725	Analysed on 13 January 2021 at 21:18	34905		-1.95143	12.7199	0.0263385
0.00856826	3.45e-07	0.0505427	5.13e-07	8.16888	0.00943	spex	Analysed on 13 January 2021 at 21:26	34906
0.00856075	3.27e-07	0.0504416	8.14e-07	7.55958	0.00773	tc1725	Analysed on 13 January 2021 at 21:34	34907		-1.94559	12.7258	0.0261828
0.00857309	5.35e-07	0.0505372	9.07e-07	8.1993	0.00757	spex	Analysed on 13 January 2021 at 21:42	34908
0.00855575	1.2e-06	0.050442	8.74e-07	7.42605	0.0166	tc1725	Analysed on 13 January 2021 at 21:51	34909		-1.90035	12.7717	0.0282967	12.7391	0.0567347
0.00857489	5.25e-07	0.0505389	6.75e-07	8.29571	0.0321	spex	Analysed on 13 January 2021 at 22:09	34910
0.00855971	1.01e-06	0.0504461	9.18e-07	7.76407	0.021	tc1725	Analysed on 13 January 2021 at 22:17	34911		-1.95421	12.7171	0.0265754
0.00855061	3.21e-07	0.0505508	7.09e-07	7.78809	0.00541	spex	Analysed on 13 January 2021 at 22:26	34912
0.0085453	1.71e-06	0.0504501	7.59e-07	7.39638	0.0258	tc1725	Analysed on 13 January 2021 at 22:34	34913		-1.97922	12.6917	0.0247514
0.00855987	1.45e-06	0.0505496	6.96e-07	8.07275	0.0367	spex	Analysed on 13 January 2021 at 22:42	34914
0.00855427	7.91e-07	0.0504509	5.53e-07	7.67517	0.0123	tc1725	Analysed on 13 January 2021 at 22:50	34915		-1.98817	12.6826	0.0225903	12.6971	0.0357283
0.00853851	7.4e-07	0.0505533	7.16e-07	7.66732	0.00673	spex	Analysed on 13 January 2021 at 22:59	34916
0.0085329	1.89e-06	0.0504578	7.65e-07	7.09869	0.0282	tc1725	Analysed on 13 January 2021 at 23:07	34917		-1.83973	12.8332	0.0248679
0.00854882	1.44e-06	0.0505483	6.93e-07	7.7795	0.0272	spex	Analysed on 13 January 2021 at 23:15	34918
0.00853653	1.18e-06	0.0504563	7.57e-07	7.10075	0.0145	tc1725	Analysed on 13 January 2021 at 23:24	34919		-1.8932	12.779	0.0254686
0.00852809	9.58e-07	0.0505558	7.76e-07	7.52583	0.0144	spex	Analysed on 13 January 2021 at 23:32	34920
0.00852064	2.02e-06	0.05046	7.82e-07	6.86619	0.0284	tc1725	Analysed on 13 January 2021 at 23:40	34921		-1.86088	12.8118	0.0239255	12.808	0.0546447
0.00854846	7.17e-07	0.0505525	4.97e-07	7.79834	0.021	spex	Analysed on 13 January 2021 at 23:48	34922
0.00851831	1.32e-06	0.050461	6.09e-07	10.7555	0.0184	tc1725	Analysed on 13 January 2021 at 23:57	34923		-1.87469	12.7978	0.0242937
0.0085331	5.87e-07	0.0505591	9.43e-07	7.48545	0.0135	spex	Analysed on 14 January 2021 at 00:05	34924
0.00853402	7.09e-07	0.0504681	5.99e-07	11.0939	0.0156	tc1725	Analysed on 14 January 2021 at 00:13	34925		-1.77582	12.8981	0.025148
0.00852934	1.45e-06	0.0505566	6.06e-07	7.4902	0.0144	spex	Analysed on 14 January 2021 at 00:21	34926
0.00852552	1.22e-06	0.0504683	5.29e-07	11.2562	0.0306	tc1725	Analysed on 14 January 2021 at 00:30	34927		-1.69729	12.9778	0.0284199	12.8912	0.180404
0.00855143	1.75e-06	0.0505517	1.19e-06	7.93425	0.0271	spex	Analysed on 14 January 2021 at 00:38	34928
0.00851644	6.76e-07	0.0504539	6.97e-07	6.90913	0.00545	tc1725	Analysed on 14 January 2021 at 00:46	34929		-1.96002	12.7112	0.0335123
0.00854439	1.87e-06	0.0505542	9.83e-07	7.96734	0.0238	spex	Analysed on 14 January 2021 at 00:54	34930
0.00851616	2.48e-06	0.0504553	6.58e-07	7.10463	0.0336	tc1725	Analysed on 14 January 2021 at 01:03	34931		-1.91239	12.7595	0.0310378
0.00852663	2.2e-06	0.0505497	1.03e-06	7.71023	0.0156	spex	Analysed on 14 January 2021 at 01:11	34932
0.00850739	2.5e-06	0.0504529	6.06e-07	7.03812	0.0328	tc1725	Analysed on 14 January 2021 at 01:19	34933		-1.90162	12.7704	0.0300022	12.747	0.0630771
0.00853786	1.9e-06	0.0505483	9.33e-07	7.73537	0.0282	spex	Analysed on 14 January 2021 at 01:28	34934
0.00850565	8.73e-07	0.0504573	6.63e-07	7.52669	0.0107	tc1725	Analysed on 14 January 2021 at 01:36	34935		-1.8596	12.8131	0.0273449
0.00851869	2.29e-06	0.0505542	7.74e-07	7.69108	0.0128	spex	Analysed on 14 January 2021 at 01:44	34936
0.00852591	1.84e-06	0.0504536	9.44e-07	7.66896	0.0346	tc1725	Analysed on 14 January 2021 at 01:52	34937		-1.90712	12.7648	0.0312392
0.00855553	2.41e-06	0.0505459	1e-06	8.12303	0.0299	spex	Analysed on 14 January 2021 at 02:01	34938
0.00853101	2.27e-06	0.0504504	6.24e-07	7.7407	0.0374	tc1725	Analysed on 14 January 2021 at 02:09	34939		-1.93459	12.737	0.0264427	12.7716	0.0769954
0.00851204	2.33e-06	0.0505505	6.29e-07	7.59465	0.0276	spex	Analysed on 14 January 2021 at 02:17	34940
0.00852513	1.27e-06	0.0504425	1.02e-06	6.6524	0.00865	tc1725	Analysed on 14 January 2021 at 02:25	34941		-2.10894	12.5601	0.03785
0.00853084	2.39e-06	0.0505476	1.49e-06	7.77424	0.0216	spex	Analysed on 14 January 2021 at 02:34	34942
0.00851512	1.4e-06	0.0504465	8.37e-07	6.451	0.0185	tc1725	Analysed on 14 January 2021 at 02:42	34943		-1.95498	12.7163	0.0380619
0.00855321	1.53e-06	0.050543	8.82e-07	8.03178	0.00782	spex	Analysed on 14 January 2021 at 02:50	34944
0.00852101	2.67e-06	0.0504456	8.49e-07	6.56933	0.0258	tc1725	Analysed on 14 January 2021 at 02:58	34945		-1.96015	12.711	0.0266472	12.6625	0.177443
0.00853189	9.19e-07	0.0505463	5.59e-07	7.7429	0.024	spex	Analysed on 14 January 2021 at 03:07	34946
0.00856602	1.17e-06	0.0505047	1.11e-06	9.45873	0.0102	spex	Analysed on 14 January 2021 at 08:30	34947
0.00857264	8.1e-07	0.0504134	1.03e-06	9.40555	0.00533	tc1725	Analysed on 14 January 2021 at 08:38	34948		-1.81539	12.8579	0.0399241
0.00857241	6.84e-07	0.0505055	1.33e-06	8.9095	0.0306	spex	Analysed on 14 January 2021 at 08:46	34949
0.00857149	1.03e-06	0.0504242	1.6e-06	9.18095	0.011	tc1725	Analysed on 14 January 2021 at 08:54	34950		-1.83562	12.8374	0.043357
0.00857797	4.5e-07	0.0505285	6.77e-07	8.49407	0.00522	spex	Analysed on 14 January 2021 at 09:03	34951
0.00856624	5.24e-07	0.0504216	8.05e-07	8.94985	0.0229	tc1725	Analysed on 14 January 2021 at 09:11	34952		-2.09925	12.5699	0.0310078	12.7551	0.321392
0.00857466	8.98e-07	0.0505268	1.16e-06	8.44238	0.0138	spex	Analysed on 14 January 2021 at 09:19	34953
0.00856885	7.33e-07	0.0504133	1.88e-06	9.65267	0.0232	tc1725	Analysed on 14 January 2021 at 09:27	34954		-1.91734	12.7545	0.0506001
0.00857278	4.21e-07	0.0504934	1.28e-06	9.08208	0.00983	spex	Analysed on 14 January 2021 at 09:36	34955
0.00856645	8.76e-07	0.0504049	2.16e-06	9.50505	0.0293	tc1725	Analysed on 14 January 2021 at 09:44	34956		-1.87309	12.7994	0.0535382
0.00857513	6.4e-07	0.0505056	9.94e-07	8.81393	0.0243	spex	Analysed on 14 January 2021 at 09:52	34957
0.00856767	9.96e-07	0.0504192	1.97e-06	9.31853	0.017	tc1725	Analysed on 14 January 2021 at 10:01	34958		-1.92383	12.7479	0.0642862	12.7672	0.0560388
0.00857787	1.23e-06	0.0505272	2.38e-06	8.61011	0.00821	spex	Analysed on 14 January 2021 at 10:09	34959
0.0085727	1.02e-06	0.050441	2.69e-06	8.90865	0.0104	tc1725	Analysed on 14 January 2021 at 10:17	34960		-1.77516	12.8987	0.0789604
0.00858179	8.08e-07	0.0505342	1.73e-06	8.40907	0.0117	spex	Analysed on 14 January 2021 at 10:25	34961
0.00857451	9.38e-07	0.0504244	1.91e-06	8.64464	0.0063	tc1725	Analysed on 14 January 2021 at 10:34	34962		-1.81756	12.8557	0.0743599
0.0085684	1.31e-06	0.0504982	2.73e-06	9.00799	0.0226	spex	Analysed on 14 January 2021 at 10:42	34963
0.00857423	9.57e-07	0.0504123	1.91e-06	9.19099	0.0171	tc1725	Analysed on 14 January 2021 at 10:50	34964		-1.79457	12.8791	0.071599	12.8778	0.0430722
0.00857845	7.87e-07	0.0505077	1.4e-06	8.72173	0.0239	spex	Analysed on 14 January 2021 at 10:58	34965
0.00856971	1.17e-06	0.0505014	2.39e-06	7.07167	0.00449	spex	Analysed on 14 January 2021 at 12:02	34972
0.00855559	1.01e-06	0.0503952	2.25e-06	9.41317	0.0174	tc1725	Analysed on 14 January 2021 at 12:11	34973		-2.10741	12.5616	0.0689975
0.00857892	6.49e-07	0.0505019	1.16e-06	6.90736	0.0051	spex	Analysed on 14 January 2021 at 12:19	34974
0.00856431	9.33e-07	0.0503936	2.32e-06	9.54575	0.0178	tc1725	Analysed on 14 January 2021 at 12:27	34975		-1.94521	12.7262	0.0727989
0.00856639	1.46e-06	0.0504818	2.6e-06	7.0843	0.0127	spex	Analysed on 14 January 2021 at 12:35	34976
0.00856764	1.15e-06	0.0504016	1.92e-06	9.37945	0.0119	tc1725	Analysed on 14 January 2021 at 12:44	34977		-1.77445	12.8995	0.0813242	12.7291	0.337892
0.00857342	1.15e-06	0.0505007	2.53e-06	6.92413	0.0108	spex	Analysed on 14 January 2021 at 12:52	34978
0.00856542	1.59e-06	0.0504136	4.23e-06	9.91473	0.0188	tc1725	Analysed on 14 January 2021 at 13:00	34979		-1.94371	12.7277	0.10355
0.00858363	7.48e-07	0.0505229	1.73e-06	9.49004	0.00954	spex	Analysed on 14 January 2021 at 13:31	34982
0.00857156	8.38e-07	0.0504194	1.5e-06	9.61158	0.00866	tc1725	Analysed on 14 January 2021 at 13:39	34983		-1.95939	12.7118	0.0477474
0.0085803	5.4e-07	0.0505138	7.53e-07	9.67014	0.00657	spex	Analysed on 14 January 2021 at 13:47	34984
0.00857116	4.3e-07	0.0504227	1.29e-06	9.49474	0.00658	tc1725	Analysed on 14 January 2021 at 13:56	34985		-1.96992	12.7011	0.0351913	12.7136	0.0267745
0.00858432	5.64e-07	0.0505307	9.61e-07	9.48662	0.00745	spex	Analysed on 14 January 2021 at 14:04	34986
0.00856976	6.32e-07	0.0504361	2.03e-06	9.35785	0.00723	tc1725	Analysed on 14 January 2021 at 14:12	34987		-2.01641	12.654	0.0816551
0.00857987	1.33e-06	0.0505452	3.46e-06	9.35027	0.0149	spex	Analysed on 14 January 2021 at 14:20	34988
0.00857108	5.28e-07	0.0504403	1.78e-06	10.1321	0.028	tc1725	Analysed on 14 January 2021 at 14:29	34989		-1.83464	12.8384	0.0847736
0.00857834	6.95e-07	0.0505208	1.79e-06	9.87358	0.00576	spex	Analysed on 14 January 2021 at 14:37	34990
0.00857422	7.4e-07	0.0504338	1.56e-06	10.6078	0.00793	tc1725	Analysed on 14 January 2021 at 14:45	34991		-1.74469	12.9297	0.0553053	12.8073	0.28091
0.00857596	7.15e-07	0.0505232	1.47e-06	9.85928	0.011	spex	Analysed on 14 January 2021 at 14:54	34992
0.00857058	8.26e-07	0.0504317	1.73e-06	10.4873	0.00667	tc1725	Analysed on 14 January 2021 at 15:02	34993		-1.92661	12.7451	0.0565265
0.00857893	4.71e-07	0.050535	1.73e-06	9.91424	0.0126	spex	Analysed on 14 January 2021 at 15:10	34994
0.00856953	1.1e-06	0.0504258	1.89e-06	10.0722	0.0117	tc1725	Analysed on 14 January 2021 at 15:21	34995		-2.04782	12.6221	0.0666222
0.00857776	6.19e-07	0.0505236	2.18e-06	10.062	0.0112	spex	Analysed on 14 January 2021 at 15:29	34996
0.00856071	1.68e-06	0.0504185	3.12e-06	9.9173	0.0201	tc1725	Analysed on 14 January 2021 at 15:37	34997		-2.11172	12.5572	0.0782496	12.6415	0.190804
0.00857346	1.09e-06	0.0505267	1.05e-06	10.0907	0.00773	spex	Analysed on 14 January 2021 at 15:46	34998
0.00856074	1.07e-06	0.0504244	2.67e-06	8.602	0.00648	tc1725	Analysed on 14 January 2021 at 15:54	34999		-1.92808	12.7436	0.0689665
0.00857133	7.99e-07	0.0505168	1.97e-06	10.2401	0.012	spex	Analysed on 14 January 2021 at 16:02	35000
0.008564	9.87e-07	0.0504141	1.91e-06	8.81002	0.0174	tc1725	Analysed on 14 January 2021 at 16:10	35001		-2.00849	12.662	0.0727277
0.00856776	1.65e-06	0.0505143	2.44e-06	10.2194	0.0162	spex	Analysed on 14 January 2021 at 16:19	35002
0.00855351	1.77e-06	0.0504049	4.12e-06	8.70373	0.0197	tc1725	Analysed on 14 January 2021 at 16:27	35003		-2.08364	12.5857	0.125822	12.6638	0.157879
0.00856582	1.8e-06	0.0505059	4.17e-06	10.2676	0.0205	spex	Analysed on 14 January 2021 at 16:35	35004
0.00855387	1.84e-06	0.0504089	2.35e-06	7.00971	0.00917	tc1725	Analysed on 14 January 2021 at 16:44	35005		-1.88934	12.7829	0.123165
0.00856787	1.64e-06	0.0505027	3.97e-06	10.0481	0.0371	spex	Analysed on 14 January 2021 at 16:52	35006
0.0085607	8.78e-07	0.0503958	2.41e-06	6.9641	0.0147	tc1725	Analysed on 14 January 2021 at 17:00	35007		-2.151	12.5174	0.112281
0.00857344	1.65e-06	0.0505061	3.25e-06	10.0777	0.0171	spex	Analysed on 14 January 2021 at 17:08	35008
0.00856359	1.21e-06	0.0504062	2.31e-06	6.86384	0.00503	tc1725	Analysed on 14 January 2021 at 17:17	35009		-2.07638	12.5931	0.0925957	12.6311	0.273549
0.00857654	9.29e-07	0.050516	2.44e-06	10.2002	0.0156	spex	Analysed on 14 January 2021 at 17:25	35010
0.00856758	7.26e-07	0.0504259	1.83e-06	14.9082	0.0177	tc1725	Analysed on 14 January 2021 at 17:33	35011		-1.81205	12.8613	0.0639556
0.00857576	5.92e-07	0.0505189	1.06e-06	10.1411	0.00466	spex	Analysed on 14 January 2021 at 17:41	35012
0.00857281	8.04e-07	0.050424	1.45e-06	14.8157	0.0109	tc1725	Analysed on 14 January 2021 at 17:50	35013		-1.92977	12.7419	0.0620855
0.00857548	9.35e-07	0.0505241	2.57e-06	10.0637	0.016	spex	Analysed on 14 January 2021 at 17:58	35014
0.00856481	1.22e-06	0.0504184	2.57e-06	14.6808	0.0249	tc1725	Analysed on 14 January 2021 at 18:06	35015		-1.98412	12.6867	0.0833495	12.7633	0.178503
0.00857554	7.98e-07	0.0505133	2.12e-06	9.96495	0.00982	spex	Analysed on 14 January 2021 at 18:15	35016
0.00856548	1.25e-06	0.0504211	3.11e-06	10.0027	0.0174	tc1725	Analysed on 14 January 2021 at 18:23	35017		-2.01266	12.6578	0.08844
0.00858216	1.03e-06	0.0505322	2.4e-06	10.0278	0.00934	spex	Analysed on 14 January 2021 at 18:31	35018
0.00857103	1.13e-06	0.0504307	3.56e-06	9.98852	0.0177	tc1725	Analysed on 14 January 2021 at 18:39	35019		-1.75003	12.9242	0.112534
0.00857511	1.75e-06	0.050506	3.72e-06	9.95445	0.0229	spex	Analysed on 14 January 2021 at 18:48	35020
0.00856931	4.82e-07	0.0504215	1.35e-06	9.96288	0.0062	tc1725	Analysed on 14 January 2021 at 18:56	35021		-1.99921	12.6714	0.0861655	12.7511	0.300144
0.00858643	8.21e-07	0.0505391	1.81e-06	10.0513	0.00786	spex	Analysed on 14 January 2021 at 19:04	35022
0.00856922	7.97e-07	0.050495	1.59e-06	10.2776	0.0134	spex	Analysed on 14 January 2021 at 19:52	35027
0.00856867	5.06e-07	0.0504121	1.32e-06	9.18913	0.00703	tc1725	Analysed on 14 January 2021 at 20:02	35028		-1.69048	12.9847	0.0516569
0.00856562	9.03e-07	0.0505	1.59e-06	10.3869	0.0154	spex	Analysed on 14 January 2021 at 20:10	35029
0.00855207	5.03e-07	0.0504083	1.9e-06	9.02525	0.0125	tc1725	Analysed on 14 January 2021 at 20:19	35030		-1.89638	12.7757	0.0527554
0.00856781	4.86e-07	0.0505081	9.73e-07	10.4083	0.00963	spex	Analysed on 14 January 2021 at 20:27	35031
0.00855892	6.22e-07	0.0504098	8.44e-07	9.11958	0.00603	tc1725	Analysed on 14 January 2021 at 20:35	35032		-1.88407	12.7882	0.0306278	12.8495	0.234374
0.00856216	5.1e-07	0.0505017	8.55e-07	10.3154	0.00569	spex	Analysed on 14 January 2021 at 20:43	35033
0.00857893	5.57e-07	0.0505155	1.02e-06	10.8652	0.00987	spex	Analysed on 14 January 2021 at 21:12	35034
0.00856963	3.36e-07	0.0504255	8.19e-07	10.2969	0.00788	tc1725	Analysed on 14 January 2021 at 21:20	35035		-1.72383	12.9508	0.042634
0.00857662	6.08e-07	0.0505098	1.71e-06	10.8018	0.00864	spex	Analysed on 14 January 2021 at 21:28	35036
0.00856861	5.41e-07	0.0504205	1.23e-06	10.214	0.0106	tc1725	Analysed on 14 January 2021 at 21:36	35037		-1.94393	12.7275	0.0461078
0.00858138	3.97e-07	0.0505276	9.91e-07	10.7286	0.00472	spex	Analysed on 14 January 2021 at 21:45	35038
0.00856608	5.17e-07	0.0504131	1.22e-06	8.09122	0.0042	tc1725	Analysed on 14 January 2021 at 21:53	35039		-1.98729	12.6835	0.0455747	12.7873	0.28669
0.00857031	8.86e-07	0.0504994	1.68e-06	10.6345	0.0128	spex	Analysed on 14 January 2021 at 22:01	35040
0.00856535	4.33e-07	0.0504045	1.13e-06	8.17178	0.00477	tc1725	Analysed on 14 January 2021 at 22:09	35041		-1.89218	12.78	0.0480979
0.00857386	4.65e-07	0.0505008	1.34e-06	10.8486	0.011	spex	Analysed on 14 January 2021 at 22:18	35042
0.00856477	4.49e-07	0.0503934	1e-06	8.12356	0.00272	tc1725	Analysed on 14 January 2021 at 22:26	35043		-2.08757	12.5817	0.0517903
0.00857268	7.92e-07	0.0504969	2.01e-06	10.7232	0.0161	spex	Analysed on 14 January 2021 at 22:34	35044
0.00856604	4.89e-07	0.0503969	8.66e-07	9.4126	0.004	tc1725	Analysed on 14 January 2021 at 22:43	35045		-1.84383	12.8291	0.0742018	12.7303	0.261898
0.00856818	1.12e-06	0.050483	3.04e-06	10.7977	0.0176	spex	Analysed on 14 January 2021 at 22:51	35046
0.00856076	4.5e-07	0.0503876	8.43e-07	9.4289	0.00577	tc1725	Analysed on 14 January 2021 at 22:59	35047		-1.97337	12.6976	0.0727497
0.00857249	9.75e-07	0.0504914	1.88e-06	10.7869	0.0145	spex	Analysed on 14 January 2021 at 23:07	35048								TC1725-01	12.6857	0.190567
0.0085612	5.74e-07	0.0503883	1.21e-06	9.40472	0.00904	tc1725	Analysed on 14 January 2021 at 23:16	35049		-2.08897	12.5803	0.0471542				TC1725-02	12.6042	0.206388
0.00857198	3.84e-07	0.0504961	8.15e-07	10.7791	0.00878	spex	Analysed on 14 January 2021 at 23:24	35050								TC1725-03	12.7515	0.202597
0.00856765	4.78e-07	0.0504016	6.35e-07	13.9204	0.00775	tc1725	Analysed on 14 January 2021 at 23:32	35051		-1.82974	12.8434	0.0519367	12.7071	0.263552		TC1725-04	12.6561	0.37108
0.00856689	1.17e-06	0.0504919	2.41e-06	10.7258	0.0112	spex	Analysed on 14 January 2021 at 23:40	35052								TC1725-05	12.7929	0.301167
0.00856133	3.7e-07	0.0504087	8.86e-07	13.9248	0.0112	tc1725	Analysed on 14 January 2021 at 23:49	35053		-1.74565	12.9287	0.0545822				TC1725-06	12.729	0.308834
0.00857205	4.28e-07	0.0505017	1e-06	10.8039	0.00517	spex	Analysed on 14 January 2021 at 23:57	35054								TC1725-07	12.8488	0.166484
0.00856183	4.19e-07	0.0504072	1.18e-06	13.9378	0.0162	tc1725	Analysed on 15 January 2021 at 00:05	35055		-1.83871	12.8343	0.037383				TC1725-08	12.8407	0.213894
0.00857098	6.58e-07	0.0504984	1.08e-06	10.7073	0.00992	spex	Analysed on 15 January 2021 at 00:13	35056								TC1725-09	12.8481	0.0943998
0.00856855	5.43e-07	0.0504175	1.31e-06	9.74964	0.00446	tc1725	Analysed on 15 January 2021 at 00:22	35057		-1.58977	13.0869	0.038759	12.9499	0.255265		TC1725-10	12.6243	0.211971
0.00856969	6.95e-07	0.0504972	9.71e-07	10.7928	0.0063	spex	Analysed on 15 January 2021 at 00:30	35058								TC1725-11	12.6197	0.29107
0.00856645	5.55e-07	0.0504165	1.07e-06	9.8112	0.00583	tc1725	Analysed on 15 January 2021 at 00:38	35059		-1.70032	12.9747	0.0370849				TC1725-12	12.606	0.0842988
0.00857297	8e-07	0.0505074	1.19e-06	10.7939	0.00989	spex	Analysed on 15 January 2021 at 00:46	35060								TC1725-13	12.5376	0.229191
0.00856622	4.62e-07	0.0504165	1.43e-06	9.78246	0.00777	tc1725	Analysed on 15 January 2021 at 00:55	35061		-1.83294	12.8401	0.042329				TC1725-14	12.5366	0.135241
0.0085702	9.54e-07	0.0505108	1.05e-06	10.7361	0.0099	spex	Analysed on 15 January 2021 at 01:03	35062								TC1725-15	12.6026	0.283345
0.00856462	6.5e-07	0.050422	1.2e-06	8.38581	0.00574	tc1725	Analysed on 15 January 2021 at 01:11	35063		-1.73096	12.9436	0.0346498	12.9195	0.140907		TC1725-16	12.6732	0.311022
0.00857206	5.59e-07	0.0505081	7.18e-07	10.6898	0.0078	spex	Analysed on 15 January 2021 at 01:20	35064								TC1725-17	12.8498	0.283399
0.00856676	8.96e-07	0.0504141	9.78e-07	8.36765	0.00458	tc1725	Analysed on 15 January 2021 at 01:28	35065		-1.8187	12.8546	0.0369995				TC1725-18	12.754	0.280789
0.00856994	9.12e-07	0.0505039	1.42e-06	10.6937	0.00918	spex	Analysed on 15 January 2021 at 01:36	35066								TC1725-19	12.7174	0.205415
0.00855864	1.21e-06	0.050417	1.49e-06	8.34334	0.0049	tc1725	Analysed on 15 January 2021 at 01:44	35067		-1.87501	12.7974	0.0436298				TC1725-20	12.8853	0.180425
0.00857255	8.63e-07	0.0505196	7.82e-07	10.7268	0.00348	spex	Analysed on 15 January 2021 at 01:53	35068								TC1725-21	12.9342	0.128678
0.00855642	6.28e-07	0.0504149	1.1e-06	8.3475	0.00608	tc1725	Analysed on 15 January 2021 at 02:01	35069		-1.97448	12.6965	0.0325434	12.7828	0.160079		TC1725-22	12.8849	0.260403
0.00856305	7.68e-07	0.0505097	9.36e-07	10.636	0.00774	spex	Analysed on 15 January 2021 at 02:09	35070								TC1725-23	12.7846	0.162691
0.00855749	4.41e-07	0.0504645	9.68e-07	12.0962	0.0144	spex	Analysed on 15 January 2021 at 09:15	35111								TC1725-24	12.7878	0.196225
0.00854375	4.56e-07	0.0503561	1.17e-06	9.65955	0.0132	tc1725	Analysed on 15 January 2021 at 09:23	35112		-2.0377	12.6323	0.0332622				TC1725-25	12.7391	0.0567347
0.0085493	4.56e-07	0.0504533	7.11e-07	11.8264	0.0151	spex	Analysed on 15 January 2021 at 09:32	35113								TC1725-26	12.6971	0.0357283
0.00854263	6.71e-07	0.0503502	1.26e-06	10.3247	0.0119	tc1725	Analysed on 15 January 2021 at 09:40	35114		-2.05702	12.6127	0.0340193				TC1725-27	12.808	0.0546447
0.00855346	4.37e-07	0.0504547	9.2e-07	11.8611	0.0108	spex	Analysed on 15 January 2021 at 09:48	35115								TC1725-28	12.8912	0.180404
0.00854188	1e-06	0.0503511	2.05e-06	10.3614	0.0189	tc1725	Analysed on 15 January 2021 at 09:57	35116		-2.00002	12.6706	0.0484378	12.6386	0.0588277		TC1725-29	12.747	0.0630771
0.00855384	5.45e-07	0.0504492	9.52e-07	11.8695	0.0136	spex	Analysed on 15 January 2021 at 10:05	35117								TC1725-30	12.7716	0.0769954
0.0085419	4.58e-07	0.0503491	1.44e-06	10.3895	0.0142	tc1725	Analysed on 15 January 2021 at 10:13	35118		-1.97942	12.6915	0.0454968				TC1725-31	12.6625	0.177443
0.00855213	7.07e-07	0.0504488	1.51e-06	11.8946	0.0148	spex	Analysed on 15 January 2021 at 10:22	35119								TC1725-32	12.7551	0.321392
0.00853871	4.36e-07	0.0503424	1.6e-06	10.2335	0.0172	tc1725	Analysed on 15 January 2021 at 10:30	35120		-2.09957	12.5696	0.0500046				TC1725-33	12.7672	0.0560388
0.0085519	6.12e-07	0.0504479	1.23e-06	11.9158	0.0149	spex	Analysed on 15 January 2021 at 10:38	35121								TC1725-34	12.8778	0.0430722
0.00854194	6.6e-07	0.0503533	1.51e-06	10.3983	0.0117	tc1725	Analysed on 15 January 2021 at 10:46	35122		-1.81307	12.8603	0.0461266	12.7071	0.291971		TC1725-35	12.7291	0.337892
0.00854905	6.7e-07	0.0504417	1.27e-06	11.8089	0.0219	spex	Analysed on 15 January 2021 at 10:55	35123								TC1725-36	12.7136	0.0267745
0.00853976	4.08e-07	0.050351	8.27e-07	15.3869	0.0103	tc1725	Analysed on 15 January 2021 at 11:03	35124		-1.96343	12.7077	0.0401115				TC1725-37	12.8073	0.28091
0.00855375	4.68e-07	0.0504585	1.34e-06	11.8708	0.00989	spex	Analysed on 15 January 2021 at 11:11	35125								TC1725-38	12.6415	0.190804
0.00854864	5.18e-07	0.0503498	1.58e-06	15.7437	0.0208	tc1725	Analysed on 15 January 2021 at 11:19	35126		-1.98929	12.6815	0.0567033				TC1725-39	12.6638	0.157879
0.00854893	7.64e-07	0.0504419	1.97e-06	11.7918	0.0226	spex	Analysed on 15 January 2021 at 11:32	35127								TC1725-40	12.6311	0.273549
0.00854932	2.94e-07	0.0503695	7.29e-07	10.3607	0.00847	TC1725	Analysed on 15 January 2021 at 11:41	35128		-1.66332	13.0122	0.0703319	12.8005	0.36772		TC1725-41	12.7633	0.178503
0.00855543	1.04e-06	0.050465	2.86e-06	11.9958	0.0296	spex	Analysed on 15 January 2021 at 11:49	35129								TC1725-42	12.7511	0.300144
0.00855083	6.2e-07	0.0504466	1.45e-06	11.8379	0.023	spex	Analysed on 15 January 2021 at 12:06	35131								TC1725-43	12.8495	0.234374
0.00854824	3.64e-07	0.0503603	9.62e-07	10.2866	0.00966	TC1725	Analysed on 15 January 2021 at 12:14	35132		-1.79036	12.8833	0.0388492				TC1725-44	12.7873	0.28669
0.00855494	4.52e-07	0.0504547	9e-07	11.897	0.00935	spex	Analysed on 15 January 2021 at 12:22	35133								TC1725-45	12.7303	0.261898
0.00854202	5.21e-07	0.0503522	1.67e-06	10.2299	0.0149	TC1725	Analysed on 15 January 2021 at 12:30	35134		-1.93252	12.7391	0.0465466				TC1725-46	12.7071	0.263552
0.00854834	5.59e-07	0.0504447	1.38e-06	11.8539	0.0167	spex	Analysed on 15 January 2021 at 12:39	35135								TC1725-47	12.9499	0.255265
0.00854622	3.93e-07	0.0503566	6.21e-07	10.3588	0.00801	TC1725	Analysed on 15 January 2021 at 12:47	35136		-1.68561	12.9896	0.0379282	12.8707	0.251493		TC1725-48	12.9195	0.140907
0.00854768	5.94e-07	0.0504386	1.17e-06	11.7852	0.0175	spex	Analysed on 15 January 2021 at 12:55	35137								TC1725-49	12.7828	0.160079
0.00857154	6.11e-07	0.0505043	1.29e-06	10.0106	0.00449	spex	Analysed on 15 January 2021 at 15:18	35150								TC1725-50	12.6386	0.0588277
0.0085529	9.86e-07	0.0503988	1.49e-06	9.72074	0.00794	TC1725	Analysed on 15 January 2021 at 15:27	35151		-1.99698	12.6737	0.0426603				TC1725-51	12.7071	0.291971
0.00856206	1.15e-06	0.050495	8.65e-07	10.1537	0.00724	spex	Analysed on 15 January 2021 at 15:35	35152								TC1725-52	12.8005	0.36772
0.00855526	1.15e-06	0.0504046	9.49e-07	9.78069	0.00904	TC1725	Analysed on 15 January 2021 at 15:43	35153		-1.86678	12.8058	0.0335014				TC1725-53	12.8707	0.251493
0.00856393	1.19e-06	0.0505026	1.1e-06	10.1342	0.00884	spex	Analysed on 15 January 2021 at 15:52	35154								TC1725-54	12.6853	0.230094
0.0085522	6.55e-07	0.0503971	1.49e-06	9.22158	0.00745	TC1725	Analysed on 15 January 2021 at 16:00	35155		-2.09266	12.5766	0.0426957	12.6853	0.230094		TC1725-55	12.674	0.184709
0.00856918	6.23e-07	0.0505029	1.1e-06	10.1349	0.00845	spex	Analysed on 15 January 2021 at 16:08	35156								TC1725-56	12.8949	0.159444
0.00855447	9.44e-07	0.050404	1.28e-06	9.20307	0.0032	TC1725	Analysed on 15 January 2021 at 16:16	35157		-2.01847	12.6519	0.0419705				TC1725-57	12.6084	0.323936
0.00857233	4.76e-07	0.0505091	1.28e-06	10.0804	0.00618	spex	Analysed on 15 January 2021 at 16:25	35158								TC1725-58	12.6732	0.383424
0.00856539	7.28e-07	0.050405	1.73e-06	9.20975	0.00756	TC1725	Analysed on 15 January 2021 at 16:33	35159		-1.8967	12.7754	0.0495263				TC1725-59	12.75	0.257834
0.00856468	1.33e-06	0.0504925	1.27e-06	10.0095	0.00842	spex	Analysed on 15 January 2021 at 16:41	35160								TC1725-60	12.8962	0.0960116
0.0085554	4.96e-07	0.0503924	5.98e-07	9.10898	0.00644	TC1725	Analysed on 15 January 2021 at 16:49	35161		-2.07477	12.5947	0.0326105	12.674	0.184709			12.7483	0.202093
0.0085677	4.57e-07	0.0505019	8.6e-07	9.98326	0.00292	spex	Analysed on 15 January 2021 at 16:58	35162
0.00856374	4.7e-07	0.0504062	1.03e-06	9.46898	0.00576	TC1725	Analysed on 15 January 2021 at 17:06	35163		-1.84043	12.8325	0.0460791
0.00856659	8.41e-07	0.0504964	1.9e-06	10.1379	0.0107	spex	Analysed on 15 January 2021 at 17:14	35164
0.00856133	9.35e-07	0.0504055	2.07e-06	9.45154	0.013	TC1725	Analysed on 15 January 2021 at 17:23	35165		-1.80606	12.8674	0.0591135
0.008567	5.04e-07	0.0504971	1e-06	10.0633	0.0089	spex	Analysed on 15 January 2021 at 17:31	35166
0.00856359	7.23e-07	0.0504099	1.37e-06	9.43173	0.0124	TC1725	Analysed on 15 January 2021 at 17:39	35167		-1.69046	12.9847	0.0475844	12.8949	0.159444
0.00856862	6.47e-07	0.0504935	1.7e-06	9.95693	0.00604	spex	Analysed on 15 January 2021 at 17:47	35168
0.00856224	1.08e-06	0.0503995	2.4e-06	9.0182	0.0161	TC1725	Analysed on 15 January 2021 at 17:56	35169		-1.89078	12.7814	0.0622548
0.00857196	6.66e-07	0.0504966	1.1e-06	9.99166	0.0131	spex	Analysed on 15 January 2021 at 18:04	35170
0.00855888	5.64e-07	0.0503908	6.17e-07	8.99445	0.00491	TC1725	Analysed on 15 January 2021 at 18:12	35171		-2.20713	12.4604	0.0310401
0.00857439	4.12e-07	0.0505079	9.3e-07	10.0438	0.00869	spex	Analysed on 15 January 2021 at 18:20	35172
0.00856124	4.42e-07	0.0504028	1.48e-06	9.02997	0.0048	TC1725	Analysed on 15 January 2021 at 18:29	35173		-2.0861	12.5832	0.046031	12.6084	0.323936
0.00857197	5.11e-07	0.0505084	1.53e-06	10.0328	0.00551	spex	Analysed on 15 January 2021 at 18:37	35174
0.00856168	8.39e-07	0.0504138	1.51e-06	9.03953	0.00581	TC1725	Analysed on 15 January 2021 at 18:45	35175		-1.98371	12.6871	0.0467839
0.0085734	3.85e-07	0.0505196	9.77e-07	10.0014	0.00402	spex	Analysed on 15 January 2021 at 18:53	35176
0.0085616	9.32e-07	0.0504041	1.1e-06	9.22856	0.0134	TC1725	Analysed on 15 January 2021 at 19:21	35177		-2.19292	12.4748	0.042764
0.00857145	5.49e-07	0.0505102	1.58e-06	10.1367	0.00598	spex	Analysed on 15 January 2021 at 19:29	35178
0.00856892	8.25e-07	0.0504094	1.29e-06	9.15231	0.0049	TC1725	Analysed on 15 January 2021 at 19:37	35179		-1.8158	12.8575	0.0455421	12.6732	0.383424
0.00856426	5.51e-07	0.050492	1.06e-06	10.0743	0.012	spex	Analysed on 15 January 2021 at 19:45	35180
0.00856939	5.17e-07	0.0504835	1.56e-06	6.43941	0.00311	spex	Analysed on 15 January 2021 at 20:17	35181
0.00856356	6.52e-07	0.0504008	8.49e-07	6.66289	0.00635	TC1725	Analysed on 15 January 2021 at 20:26	35182		-1.86428	12.8083	0.0421339
0.00857606	9.04e-07	0.0505064	1.17e-06	6.36782	0.00419	spex	Analysed on 15 January 2021 at 20:34	35183
0.00855437	8.17e-07	0.0503828	7.01e-07	6.56633	0.00376	TC1725	Analysed on 15 January 2021 at 20:42	35184		-2.0674	12.6022	0.0333571
0.00855695	5.78e-07	0.0504679	9.87e-07	6.27334	0.00443	spex	Analysed on 15 January 2021 at 20:50	35185
0.00855118	7.21e-07	0.0503679	8.73e-07	6.52774	0.00266	TC1725	Analysed on 15 January 2021 at 20:59	35186		-1.83362	12.8394	0.0300742	12.75	0.257834
0.00855809	5.56e-07	0.0504529	7.51e-07	6.24854	0.00486	spex	Analysed on 15 January 2021 at 21:07	35187
0.00854924	7.7e-07	0.0503701	1.65e-06	6.50276	0.00739	TC1725	Analysed on 15 January 2021 at 21:15	35188		-1.78675	12.887	0.040709
0.00856252	5.45e-07	0.0504676	9.61e-07	6.26486	0.00353	spex	Analysed on 15 January 2021 at 21:23	35189
0.00855498	5.34e-07	0.0503727	1.16e-06	6.50975	0.00431	TC1725	Analysed on 15 January 2021 at 21:32	35190		-1.72652	12.9481	0.035781
0.00855643	6.69e-07	0.0504521	9.93e-07	6.24644	0.00323	spex	Analysed on 15 January 2021 at 21:40	35191
0.00854993	5.77e-07	0.0503606	1.08e-06	6.47807	0.00631	TC1725	Analysed on 15 January 2021 at 21:48	35192		-1.81983	12.8534	0.0499826	12.8962	0.0960116
0.00855585	1.1e-06	0.0504527	2.05e-06	6.23056	0.0122	spex	Analysed on 15 January 2021 at 21:57	35193
