# Supplementary material for: TC1725: a proposed chalcopyrite reference material for LA-MC-ICP-MS sulfur isotope determination
Source: Royal Society of Chemistry journal article supplement (doi:10.1039/d1ja00168j), 2021-01-01
Supplement: d1ja00168j2.xlsx [file d1ja00168j2.xlsx]

## Sheet: 黄铜矿TC1725
FileName	SampleName	'33/32 Raw'	SE	'34/32 Raw'	SE	'Total Beam (V)'	SE
6696	CPY-1	0.0079519	3.41e-06	0.0488884	2.96e-06	3.46491	0.0417		δ34S	δ34SVCDT	1SE(‰)
6696	PY-4	0.00789782	2.43e-06	0.048761	2.07e-06	6.48444	0.0962		-2.68213	1.60634	0.0909604
6696	CPY-1	0.00796409	3.1e-06	0.0488958	2.59e-06	3.69773	0.0372
6696	PY-4	0.00796639	2.3e-06	0.0487698	2.42e-06	6.88469	0.0588		-2.52356	1.76559	0.0959741
6696	CPY-1	0.00797555	2.61e-06	0.0488906	3.07e-06	3.46536	0.0381
6696	PY-4	0.00800274	2.85e-06	0.0487713	2.79e-06	6.84571	0.0554		-2.3475	1.94241	0.108504
6696	CPY-1	0.0079889	3.18e-06	0.0488815	3.3e-06	3.49378	0.0357
6696	PY-4	0.00796615	2.62e-06	0.0487691	3.11e-06	6.87038	0.0535		-2.25739	2.0329	0.112458	1.83681	0.37911
6696	CPY-1	0.00800259	3e-06	0.0488774	3.1e-06	3.46553	0.0391
6697	CPY-1	0.0081498	1.52e-06	0.0488752	2.55e-06	6.3845	0.0717		Mount 1
6697	TC1725	0.00816558	2.15e-06	0.0493051	2.9e-06	6.42493	0.056		8.71972	13.0572	0.0935709
6697	CPY-1	0.00815083	1.91e-06	0.0488826	2.48e-06	6.29796	0.0604
6697	TC1725	0.00816228	1.71e-06	0.0492818	2.65e-06	5.95343	0.0569		8.25015	12.5856	0.0926577
6697	CPY-1	0.00811636	1.76e-06	0.0488744	2.73e-06	6.20697	0.074
6697	TC1725	0.00817411	2.03e-06	0.0492923	2.81e-06	6.38916	0.0663		8.46002	12.7964	0.0953471
6697	CPY-1	0.00813306	1.95e-06	0.048883	2.55e-06	6.40306	0.0777
6697	TC1725	0.00818172	1.53e-06	0.0493113	2.35e-06	6.68865	0.0649		8.68508	13.0224	0.084772
6697	CPY-1	0.00816971	1.4e-06	0.0488904	2.29e-06	6.56198	0.0721
6697	TC1725	0.00818984	1.31e-06	0.0492901	2.63e-06	6.2111	0.0664		8.22431	12.5597	0.0885886
6697	CPY-1	0.0081548	1.86e-06	0.0488855	2.59e-06	6.46244	0.0691
6697	TC1725	0.00818535	1.74e-06	0.0492779	2.65e-06	5.9345	0.0999		8.01846	12.3529	0.0961365
6697	CPY-1	0.0081424	1.37e-06	0.0488863	2.91e-06	6.40085	0.0748
6697	TC1725	0.00817858	1.37e-06	0.0492898	2.96e-06	6.1242	0.0715		8.19879	12.534	0.0986036
6697	CPY-1	0.00814376	1.64e-06	0.0488915	2.48e-06	6.55592	0.0747
6697	TC1725	0.00816057	1.67e-06	0.0493028	2.32e-06	6.58458	0.0694		8.41694	12.7531	0.0867696
6697	CPY-1	0.00814828	2.51e-06	0.0488911	2.56e-06	6.46013	0.0631
6697	TC1725	0.00818233	1.8e-06	0.0492995	2.59e-06	6.28488	0.0706		8.27736	12.613	0.0934555
6697	CPY-1	0.00822623	1.2e-06	0.0488986	2.78e-06	6.58749	0.0751
6697	TC1725	0.00825263	1.54e-06	0.0493222	2.38e-06	6.97175	0.0755		8.65652	12.9937	0.0948968
6697	CPY-1	0.00820211	1.6e-06	0.0488993	2.87e-06	6.47981	0.0786
6697	TC1725	0.00826266	1.14e-06	0.0493232	2.56e-06	6.71955	0.0848		8.57014	12.907	0.0926654
6697	CPY-1	0.00822328	1.32e-06	0.0489089	2.42e-06	6.90054	0.0729
6697	TC1725	0.0082743	1.53e-06	0.0493235	2.65e-06	7.02498	0.0808		8.5075	12.8441	0.0898602
6697	CPY-1	0.00821179	1.71e-06	0.0489061	2.56e-06	6.92228	0.0689
6697	TC1725	0.00826146	1.32e-06	0.0493251	2.52e-06	7.079	0.0669		8.51651	12.8531	0.0860831
6697	CPY-1	0.00821238	1.21e-06	0.048911	2.22e-06	7.1608	0.1
6697	TC1725	0.00826033	1.51e-06	0.0493102	2.82e-06	6.96826	0.0748		8.15909	12.4942	0.08936
6697	CPY-1	0.00820777	1.46e-06	0.0489112	2.52e-06	6.95623	0.0899
6697	TC1725	0.00825325	1.31e-06	0.049323	2.67e-06	6.88757	0.0813		8.45974	12.7961	0.088736
6697	CPY-1	0.00823112	1.44e-06	0.0489073	2.34e-06	6.92786	0.0649
6697	TC1725	0.00825897	2.07e-06	0.0493232	2.46e-06	7.20984	0.0921		8.42559	12.7618	0.0851154
6697	CPY-1	0.00822049	1.41e-06	0.0489149	2.43e-06	7.0832	0.0788
6697	TC1725	0.00823858	1.16e-06	0.0493313	2.71e-06	7.02696	0.0799		8.51347	12.8501	0.0901046
6697	CPY-1	0.00822646	1.28e-06	0.0489148	2.51e-06	7.08794	0.0763
6697	TC1725	0.00825906	1.22e-06	0.0493305	2.08e-06	7.06654	0.0862		8.52195	12.8586	0.0857102
6697	CPY-1	0.00820008	1.29e-06	0.0489126	2.65e-06	7.19851	0.0849
6697	TC1725	0.00825684	1.21e-06	0.049337	2.53e-06	7.42033	0.069		8.54504	12.8818	0.0871028
6697	CPY-1	0.00824332	1.31e-06	0.0489253	2.2e-06	7.15426	0.082
6697	TC1725	0.00826596	1.1e-06	0.0493279	2.37e-06	7.3728	0.099		8.29503	12.6307	0.0819594
6697	CPY-1	0.00821821	1.27e-06	0.0489188	2.39e-06	7.33344	0.0762
6697	TC1725	0.00825241	1.21e-06	0.0493338	2.41e-06	7.20731	0.0617		8.46747	12.8039	0.0855724
6697	CPY-1	0.00823101	1.18e-06	0.0489203	2.47e-06	7.31923	0.0847
6697	TC1725	0.0082357	1.78e-06	0.0493244	2.84e-06	7.3497	0.0816		8.25285	12.5883	0.0922927
6697	CPY-1	0.00820651	1.83e-06	0.048921	2.52e-06	7.1964	0.0747
6697	TC1725	0.00823823	1.23e-06	0.0493395	2.73e-06	7.15689	0.0899		8.57264	12.9095	0.0897891
6697	CPY-1	0.00820554	1.21e-06	0.0489194	2.37e-06	7.13023	0.0726
6697	TC1725	0.00823934	1.39e-06	0.0493487	2.45e-06	7.57585	0.085		8.83639	13.1744	0.0895485
6697	CPY-1	0.00820979	1.17e-06	0.0489135	2.77e-06	6.80322	0.102
6697	TC1725	0.00824791	1.38e-06	0.0493275	2.48e-06	7.18201	0.0958		8.41877	12.755	0.0919352
6697	CPY-1	0.00820909	1.51e-06	0.0489178	2.55e-06	7.1375	0.0751
6697	TC1725	0.0082336	1.34e-06	0.0493354	2.35e-06	7.40831	0.0787		8.5312	12.8679	0.0866899
6697	CPY-1	0.00820668	1.17e-06	0.0489183	2.46e-06	7.09321	0.0831
6697	TC1725	0.00822441	1.46e-06	0.0493347	2.55e-06	7.40132	0.0754		8.39228	12.7284	0.0881444
6697	CPY-1	0.0082096	1.36e-06	0.04893	2.48e-06	7.43867	0.0855
6697	TC1725	0.00823425	1.23e-06	0.0493402	2.51e-06	7.3124	0.0838		8.51336	12.85	0.0877861
6697	CPY-1	0.00821465	1.32e-06	0.0489174	2.47e-06	6.82118	0.0954
6697	TC1725	0.00825605	1.33e-06	0.0493279	2.76e-06	6.8638	0.103		8.44757	12.7839	0.0910641
6697	CPY-1	0.00821932	1.41e-06	0.048912	2.5e-06	7.11409	0.094
6697	TC1725	0.00825161	1.38e-06	0.0493368	3.01e-06	7.5028	0.0895		8.54766	12.8844	0.0933857
6697	CPY-1	0.00819957	1.32e-06	0.0489254	2.39e-06	7.33927	0.0857
6697	TC1725	0.0082502	1.19e-06	0.0493367	2.34e-06	7.33894	0.0853		8.33084	12.6667	0.0811442
6697	CPY-1	0.00818849	1.32e-06	0.0489327	2.16e-06	7.41403	0.0627
6697	TC1725	0.00822818	1.24e-06	0.0493459	2.52e-06	7.63228	0.0878		8.46774	12.8042	0.0873152
6697	CPY-1	0.0081934	1.48e-06	0.0489305	2.71e-06	7.18823	0.0746
6697	TC1725	0.00823419	1.37e-06	0.0493516	2.64e-06	7.7262	0.097		8.66257	12.9998	0.0943784
6697	CPY-1	0.00817244	1.59e-06	0.048925	2.67e-06	7.17092	0.0837
6697	TC1725	0.00823362	1.21e-06	0.0493359	2.49e-06	7.60205	0.0834		8.34035	12.6762	0.0950692
6697	CPY-1	0.00819923	1.14e-06	0.0489306	2.9e-06	7.41213	0.0821
6697	TC1725	0.00823908	1.39e-06	0.0493461	2.13e-06	7.43228	0.0923		8.47152	12.8079	0.0872032
6697	CPY-1	0.00819536	1.6e-06	0.0489326	2.31e-06	7.6201	0.0804
6697	TC1725	0.00821608	1.66e-06	0.0493374	2.41e-06	7.1432	0.079		8.38017	12.7162	0.085376
6697	CPY-1	0.00815492	1.45e-06	0.0489221	2.53e-06	7.47094	0.0719
6697	TC1725	0.00822011	1.5e-06	0.0493321	2.57e-06	7.21579	0.0778		8.32831	12.6641	0.0909825
6697	CPY-1	0.00818222	1.24e-06	0.0489272	2.63e-06	7.33627	0.0806
6697	TC1725	0.00820667	1.47e-06	0.0493329	3.05e-06	6.89314	0.0976		8.22926	12.5646	0.098094
6697	CPY-1	0.00819518	1.29e-06	0.0489334	2.64e-06	7.58991	0.0764
6697	TC1725	0.008215	1.57e-06	0.0493346	2.61e-06	7.36286	0.107		8.18973	12.5249	0.09087
6697	CPY-1	0.00816083	1.8e-06	0.0489343	2.47e-06	7.56822	0.0888
6697	TC1725	0.00821209	1.27e-06	0.0493362	2.48e-06	7.33231	0.0981		8.20038	12.5356	0.088746
6697	CPY-1	0.00819463	1.43e-06	0.0489356	2.59e-06	7.62555	0.0731
6697	TC1725	0.00822251	1.69e-06	0.0493469	2.44e-06	7.32254	0.0974		8.36897	12.705	0.0875853
6697	CPY-1	0.00817809	1.33e-06	0.0489391	2.41e-06	7.62656	0.0749
6697	TC1725	0.00819763	1.44e-06	0.0493554	2.41e-06	7.44548	0.0833		8.56347	12.9003	0.0825369
6697	CPY-1	0.00815784	1.72e-06	0.0489336	2.19e-06	7.70544	0.0809
6697	TC1725	0.00820734	1.84e-06	0.0493399	2.58e-06	7.84018	0.0891		8.27815	12.6137	0.0852308
6697	CPY-1	0.00819878	1.5e-06	0.0489361	2.46e-06	7.63058	0.0775
6697	TC1725	0.00821432	1.4e-06	0.0493432	2.43e-06	7.36848	0.0851		8.32386	12.6596	0.0868412
6697	CPY-1	0.008202	1.59e-06	0.0489356	2.49e-06	7.62136	0.0829
6697	TC1725	0.00822138	1.33e-06	0.0493338	2.56e-06	7.0895	0.115		8.10889	12.4438	0.0871074
6697	CPY-1	0.00818107	1.42e-06	0.0489384	2.35e-06	7.74074	0.0862
6697	TC1725	0.00819579	2.11e-06	0.0493506	2.71e-06	7.48443	0.0678		8.41923	12.7554	0.0889388
6697	CPY-1	0.00816168	2.3e-06	0.0489388	2.49e-06	7.5271	0.0726
6698	CPY-1	0.00810287	2.45e-06	0.0489399	2.1e-06	7.96903	0.0756
6698	TC1725	0.00811726	1.89e-06	0.0493588	2.23e-06	7.87811	0.0917		8.54711	12.8839	0.0779218
6698	CPY-1	0.00808654	1.67e-06	0.0489412	2.29e-06	7.85169	0.0735
6698	TC1725	0.00813583	2.22e-06	0.0493612	2.63e-06	7.92705	0.0838		8.47087	12.8073	0.085977
6698	CPY-1	0.00807617	2.02e-06	0.0489519	2.38e-06	7.79096	0.0719
6698	TC1725	0.00812631	1.8e-06	0.0493504	2.64e-06	7.64887	0.0832		8.24383	12.5793	0.086895
6698	CPY-1	0.00810486	1.96e-06	0.0489419	2.36e-06	7.24816	0.083
6698	TC1725	0.00815189	1.79e-06	0.0493654	2.54e-06	7.90819	0.0843		8.5674	12.9042	0.0885293
6698	CPY-1	0.00815863	1.56e-06	0.0489501	2.62e-06	7.89331	0.0796
6698	TC1725	0.00816843	1.66e-06	0.049357	2.64e-06	7.1477	0.0914		8.24499	12.5804	0.0944835
6698	CPY-1	0.00808308	2.04e-06	0.0489566	2.77e-06	7.74701	0.0772
6698	TC1725	0.00812736	2.12e-06	0.0493571	2.48e-06	7.84335	0.0873		8.2393	12.5747	0.0909512
6698	CPY-1	0.00807323	2.04e-06	0.048951	2.47e-06	7.84131	0.0792
6698	TC1725	0.00808229	1.78e-06	0.049378	2.19e-06	7.96767	0.0918		8.72764	13.0652	0.0831685
6698	CPY-1	0.00809388	2.05e-06	0.0489506	2.4e-06	7.72516	0.0853
6698	TC1725	0.00807665	2.15e-06	0.0493847	2.58e-06	7.61736	0.0958		8.81723	13.1551	0.0900428
6698	CPY-1	0.00804389	1.82e-06	0.0489554	2.67e-06	7.72901	0.0821
6698	TC1725	0.00809993	2.11e-06	0.0493657	2.47e-06	7.80783	0.0796		8.40746	12.7436	0.090039
6698	CPY-1	0.00808438	2.22e-06	0.0489529	2.51e-06	7.75657	0.0872
6698	TC1725	0.00810101	1.95e-06	0.0493606	2.65e-06	7.51706	0.105		8.28289	12.6185	0.0882936
6698	CPY-1	0.00808027	2.25e-06	0.0489574	2.34e-06	7.94279	0.0801
6698	TC1725	0.00812535	2.22e-06	0.0493784	2.77e-06	7.63493	0.0899		8.60065	12.9376	0.089198
6698	CPY-1	0.00810232	2.24e-06	0.0489573	2.46e-06	7.57554	0.077
6698	TC1725	0.00811932	1.85e-06	0.0493739	2.44e-06	7.83001	0.0755		8.5864	12.9233	0.0847044
6698	CPY-1	0.00811493	2.23e-06	0.0489499	2.3e-06	7.25074	0.0965
6698	TC1725	0.00814718	2.42e-06	0.0493772	2.39e-06	7.65349	0.099		8.63723	12.9744	0.0824386
6698	CPY-1	0.00810732	2.43e-06	0.0489588	2.32e-06	7.63435	0.0729
6698	TC1725	0.00812813	2.45e-06	0.0493706	2.26e-06	7.30613	0.091		8.36501	12.701	0.0827328
6698	CPY-1	0.00810585	2.41e-06	0.0489633	2.45e-06	7.85475	0.079
6698	TC1725	0.00817743	1.69e-06	0.0493817	2.73e-06	7.80099	0.0823		8.50367	12.8402	0.0867403
6698	CPY-1	0.00813279	1.41e-06	0.0489673	2.17e-06	7.43578	0.0743
6698	TC1725	0.00813902	2.33e-06	0.0493791	2.46e-06	7.67056	0.0905		8.55366	12.8904	0.0841112
6698	CPY-1	0.00807682	1.75e-06	0.0489533	2.51e-06	7.30227	0.0971
6698	TC1725	0.00813552	1.88e-06	0.0493779	2.57e-06	7.8606	0.0777		8.58745	12.9244	0.0871926
6698	CPY-1	0.00808428	1.99e-06	0.0489616	2.33e-06	7.76263	0.0903
6698	TC1725	0.00810523	2.27e-06	0.0493702	2.25e-06	7.51922	0.104		8.33882	12.6747	0.0809214
6698	CPY-1	0.00809016	1.91e-06	0.0489623	2.3e-06	7.54717	0.105
6698	TC1725	0.00813771	1.82e-06	0.0493766	2.49e-06	7.6731	0.0716		8.43504	12.7713	0.079091
6698	CPY-1	0.00810676	1.87e-06	0.048965	1.9e-06	9.81388	0.155
6698	TC1725	0.0081387	1.76e-06	0.0493685	2.8e-06	7.39452	0.0796		8.28309	12.6187	0.0839394
6698	CPY-1	0.00807445	1.51e-06	0.048961	2.36e-06	7.44789	0.0879
6698	TC1725	0.0081146	1.74e-06	0.0493699	2.47e-06	7.58925	0.0802		8.24797	12.5834	0.0881866
6698	CPY-1	0.00811742	2.81e-06	0.048971	2.66e-06	7.57418	0.0781
6698	TC1725	0.00813318	2.59e-06	0.0493761	2.52e-06	7.90295	0.0827		8.19556	12.5308	0.0918617
6698	CPY-1	0.00808178	2.17e-06	0.0489784	2.63e-06	7.59544	0.108
6698	TC1725	0.00810826	1.78e-06	0.0493805	2.51e-06	7.52075	0.0833		8.36941	12.7054	0.0902055
6698	CPY-1	0.00810332	1.85e-06	0.0489629	2.53e-06	7.34179	0.0756
6698	TC1725	0.00810704	2.68e-06	0.0493721	2.61e-06	7.44975	0.0809		8.36765	12.7036	0.0900754
6698	CPY-1	0.00809454	2.17e-06	0.0489619	2.52e-06	7.26417	0.0909
6698	TC1725	0.00809538	2.4e-06	0.0493825	2.46e-06	7.70325	0.077		8.56954	12.9064	0.0889213
6698	CPY-1	0.00806914	2e-06	0.048964	2.58e-06	7.53855	0.0889
6698	TC1725	0.00804983	3.06e-06	0.0493777	2.96e-06	7.86621	0.0876		8.45154	12.7879	0.0925058
6698	CPY-1	0.00807702	2.82e-06	0.0489637	2.29e-06	7.51307	0.0928
6698	TC1725	0.00809212	2.42e-06	0.0493832	2.36e-06	7.85897	0.0843		8.49363	12.8302	0.0864072
6698	CPY-1	0.00809998	1.6e-06	0.0489708	2.68e-06	7.00263	0.119
6698	TC1725	0.00810636	2.09e-06	0.0493834	2.18e-06	7.69379	0.0629		8.41318	12.7494	0.0903672
6698	CPY-1	0.00803081	2.65e-06	0.0489719	2.78e-06	7.22929	0.088
6698	TC1725	0.00804883	2.52e-06	0.0493861	2.43e-06	7.54009	0.0872		8.48302	12.8195	0.0890335
6698	CPY-1	0.00797035	2.65e-06	0.0489694	2.34e-06	7.48966	0.0742
6698	TC1725	0.00804263	2.3e-06	0.0493899	2.96e-06	7.29674	0.0854		8.42771	12.7639	0.0920861
6698	CPY-1	0.00799671	2.05e-06	0.0489849	2.5e-06	7.63574	0.0786
6698	TC1725	0.0080507	3.26e-06	0.049383	2.14e-06	7.49149	0.0846		8.20448	12.5398	0.0835757
6698	CPY-1	0.00801517	2e-06	0.0489774	2.45e-06	7.14573	0.0706
6698	TC1725	0.00807354	2.1e-06	0.049388	2.58e-06	7.33768	0.0922		8.36935	12.7053	0.0895967
6698	CPY-1	0.00801123	2.26e-06	0.0489788	2.59e-06	7.46685	0.0744
6698	TC1725	0.00802123	2.3e-06	0.0493773	2.6e-06	7.2182	0.111		8.13936	12.4744	0.0920558
6698	CPY-1	0.00797386	3.9e-06	0.0489785	2.64e-06	7.62426	0.0968
6698	TC1725	0.00802829	2.37e-06	0.0493838	2.85e-06	6.76347	0.108		8.28021	12.6158	0.0931519
6698	CPY-1	0.00804188	2.24e-06	0.048978	2.42e-06	7.2362	0.0883
6698	TC1725	0.00804814	2.87e-06	0.0493854	2.8e-06	6.71115	0.0818		8.31328	12.649	0.0894278
6698	CPY-1	0.0080071	3.06e-06	0.0489785	2.37e-06	7.33578	0.0773
6698	TC1725	0.00805036	2.37e-06	0.0493841	2.41e-06	6.90875	0.0962		8.23692	12.5723	0.0859697
6698	CPY-1	0.00798956	2.37e-06	0.0489829	2.53e-06	7.53485	0.0853
6698	TC1725	0.0079879	2.54e-06	0.0493995	2.37e-06	7.66	0.107		8.51274	12.8493	0.0831512
6698	CPY-1	0.00793729	3.19e-06	0.0489821	2.16e-06	7.70506	0.087
6698	TC1725	0.00800766	2.73e-06	0.0493966	2.92e-06	6.13451	0.115		8.43832	12.7746	0.0895708
6698	CPY-1	0.00796507	2.79e-06	0.0489845	2.49e-06	7.4179	0.0891
6698	TC1725	0.00799782	2.89e-06	0.0493949	2.47e-06	6.91561	0.0897		8.44415	12.7805	0.0865194
6698	CPY-1	0.00794596	2.77e-06	0.0489781	2.4e-06	7.08385	0.0941
6698	TC1725	0.00789889	3.12e-06	0.0493862	2.77e-06	6.93274	0.0957		8.28094	12.6165	0.0922945
6698	CPY-1	0.00796594	2.81e-06	0.0489831	2.67e-06	7.60182	0.0825
6698	TC1725	0.00793497	2.91e-06	0.049389	2.7e-06	6.70238	0.109		8.29548	12.6312	0.090893
6698	CPY-1	0.00791603	2.6e-06	0.0489823	2.35e-06	7.48632	0.0965
6698	TC1725	0.00796247	3.23e-06	0.0494105	2.77e-06	7.50302	0.0833		8.60995	12.947	0.091851
6698	CPY-1	0.00791433	3.22e-06	0.048995	2.68e-06	7.5232	0.0769
6698	TC1725	0.00790198	2.97e-06	0.049391	2.6e-06	6.87615	0.0973		8.14666	12.4817	0.0934539
6698	CPY-1	0.00792535	3.19e-06	0.0489887	2.67e-06	7.73554	0.0873
6698	TC1725	0.00790205	3.49e-06	0.0493947	2.78e-06	6.95686	0.11		8.17228	12.5074	0.0938299
6698	CPY-1	0.00783964	3.33e-06	0.0489998	2.53e-06	7.37224	0.1
6698	TC1725	0.00789545	2.2e-06	0.0493988	2.36e-06	7.42078	0.0931		8.20811	12.5434	0.0870229
6698	CPY-1	0.00790149	3.37e-06	0.0489935	2.51e-06	7.27344	0.0925
6698	TC1725	0.00794448	3.77e-06	0.0494011	2.36e-06	6.98497	0.0918		8.22769	12.5631	0.0859431
6698	CPY-1	0.00790408	1.94e-06	0.0490025	2.44e-06	7.47528	0.0677
6698	TC1725	0.00792314	3.59e-06	0.0493891	2.2e-06	7.05074	0.102		7.94966	12.2838	0.082482
6698	CPY-1	0.00790546	3.02e-06	0.0489967	2.37e-06	7.40157	0.0897
6698	TC1725	0.00790649	2.27e-06	0.0493994	2.81e-06	7.44331	0.0773		8.25854	12.5941	0.0879839
6698	CPY-1	0.00784309	2.94e-06	0.0489928	2.28e-06	7.28037	0.0807
6698	TC1725	0.00788587	2.94e-06	0.0494255	2.07e-06	7.51857	0.0894		8.73689	13.0745	0.0834012
6698	CPY-1	0.00783389	3.43e-06	0.049002	2.7e-06	7.5905	0.0993
6698	TC1725	0.0079534	2.42e-06	0.0494014	2.94e-06	6.72627	0.126		8.11345	12.4483	0.0983925
6698	CPY-1	0.00782859	3.21e-06	0.0490056	2.73e-06	7.30326	0.0969
6698	TC1725	0.00793241	2.59e-06	0.0494118	2.77e-06	6.83138	0.0997		8.31734	12.6531	0.0914017
6698	CPY-1	0.00791034	3.2e-06	0.0490028	2.25e-06	7.34548	0.0733
6698	TC1725	0.00793414	3.21e-06	0.0494297	2.32e-06	7.63331	0.087		8.64876	12.9859	0.0833973
6698	CPY-1	0.00783349	3.64e-06	0.0490089	2.52e-06	7.46483	0.0745
6698	TC1725	0.00784163	3.42e-06	0.0494189	2.61e-06	7.1996	0.0945		8.40841	12.7446	0.0890659
6698	CPY-1	0.00785286	4.01e-06	0.0490048	2.45e-06	7.59519	0.0836
6698	TC1725	0.00784091	3.16e-06	0.0494086	2.75e-06	7.06585	0.0911		8.12419	12.4591	0.0910091
6698	CPY-1	0.00785164	4.4e-06	0.049016	2.54e-06	7.63546	0.0776
6698	TC1725	0.00787549	2.93e-06	0.0494145	2.41e-06	7.1436	0.0882		8.18533	12.5205	0.0906217
6698	CPY-1	0.00780714	2.7e-06	0.0490106	2.75e-06	7.45799	0.085
6698	TC1725	0.00780328	3.25e-06	0.0494209	2.72e-06	6.64001	0.0913		8.30686	12.6426	0.0931438
6698	CPY-1	0.00783363	2.61e-06	0.0490169	2.45e-06	7.90686	0.089
6698	TC1725	0.00786735	4.35e-06	0.049404	2.98e-06	6.46458	0.124		8.04841	12.383	0.0932631
6698	CPY-1	0.00775559	3.68e-06	0.0490023	2.48e-06	7.95421	0.0864
6698	TC1725	0.00784006	3.38e-06	0.0494091	2.65e-06	7.2491	0.0962		8.19815	12.5334	0.0879595
6698	CPY-1	0.0077717	3.53e-06	0.0490124	2.35e-06	7.50523	0.093
6698	TC1725	0.00777022	3.34e-06	0.0494201	2.93e-06	7.12445	0.117		8.30061	12.6363	0.0907281
6698	CPY-1	0.00777515	3.18e-06	0.0490141	2.41e-06	7.96668	0.0868
6698	TC1725	0.00781778	2.85e-06	0.0494311	2.75e-06	7.27709	0.101		8.43585	12.7721	0.0950607
6698	CPY-1	0.00772395	4.29e-06	0.0490211	2.91e-06	7.65342	0.0843
6698	TC1725	0.00771329	3.76e-06	0.0494198	2.97e-06	7.21864	0.0867		8.1901	12.5253	0.0966303
6698	CPY-1	0.00770335	4.14e-06	0.0490155	2.3e-06	7.56489	0.0972
6698	TC1725	0.00774003	4.42e-06	0.0494385	2.65e-06	7.20312	0.0985		8.57241	12.9093	0.0865562
6698	CPY-1	0.00768707	3.89e-06	0.0490211	2.41e-06	7.35991	0.0929
6698	TC1725	0.00768734	3.81e-06	0.0494293	2.68e-06	6.99648	0.106		8.30645	12.6422	0.0922138
6698	CPY-1	0.00764958	3.79e-06	0.0490232	2.75e-06	7.46641	0.083
6698	TC1725	0.00767335	3.8e-06	0.0494259	2.5e-06	6.80059	0.122		8.14825	12.4833	0.0964406
6698	CPY-1	0.00760569	4.61e-06	0.0490298	2.94e-06	7.71524	0.0831
6698	TC1725	0.00769045	4.55e-06	0.0494294	2.46e-06	7.16119	0.107		8.13421	12.4692	0.0969735
6698	CPY-1	0.00756926	3.59e-06	0.0490314	2.83e-06	7.68313	0.0991
6698	TC1725	0.00768782	3.13e-06	0.0494687	1.48e-06	32.1261	0.131		8.63623	12.9734	0.0811171
6698	CPY-1	0.00764634	2.82e-06	0.0490588	2.38e-06	7.82038	0.0753
6698	TC1725	0.0076319	5.24e-06	0.0494919	1.44e-06	31.7264	0.118		8.70287	13.0403	0.0773686
6698	CPY-1	0.00754001	3.72e-06	0.0490709	2.59e-06	7.90477	0.0828
6698	TC1725	0.00752524	4.84e-06	0.0494653	2.76e-06	7.55763	0.0996		8.13185	12.4668	0.0938964
6698	CPY-1	0.00749104	3.73e-06	0.0490618	2.65e-06	7.81104	0.0877
6698	TC1725	0.00745685	4.36e-06	0.0494802	2.38e-06	7.97442	0.0907		8.37027	12.7063	0.0884645
6698	CPY-1	0.00738666	4.7e-06	0.0490772	2.5e-06	7.93497	0.0878
6698	TC1725	0.00759079	4.52e-06	0.0494648	2.73e-06	7.63146	0.0901		8.21864	12.554	0.090201
6698	CPY-1	0.0075452	6.19e-06	0.0490461	2.45e-06	7.56046	0.096
6698	TC1725	0.00752119	5.2e-06	0.0494624	2.6e-06	7.92611	0.09		8.31277	12.6485	0.0936815
6698	CPY-1	0.00749459	4.4e-06	0.0490632	2.91e-06	7.82256	0.0756
6698	TC1725	0.0074514	3.9e-06	0.0494721	2.88e-06	7.54548	0.0969		8.36385	12.6998	0.0965395
6698	CPY-1	0.00746537	3.69e-06	0.0490602	2.41e-06	7.72311	0.0831
6698	TC1725	0.00752313	4.15e-06	0.0494756	2.14e-06	7.63163	0.0853		8.57169	12.9086	0.0834599
6698	CPY-1	0.00760686	4.3e-06	0.0490499	2.54e-06	7.45657	0.0768
6698	TC1725	0.0076882	4.78e-06	0.0494494	2.83e-06	7.37965	0.0877		8.10664	12.4415	0.0962381
6698	CPY-1	0.0076028	4.24e-06	0.0490536	2.82e-06	7.50822	0.101
6698	TC1725	0.0075964	5.34e-06	0.0494655	3.01e-06	7.55696	0.0848		8.48699	12.8235	0.0985443
6698	CPY-1	0.00763883	4.63e-06	0.0490449	2.55e-06	7.66613	0.0903
6698	TC1725	0.00769589	4.38e-06	0.0494554	2.69e-06	7.55403	0.0891		8.24613	12.5816	0.0927467
6698	CPY-1	0.00748542	4.32e-06	0.0490569	2.66e-06	7.63932	0.0826
6698	TC1725	0.00747431	4.83e-06	0.0494867	2.87e-06	7.66366	0.0821		8.65701	12.9942	0.0956804
6698	CPY-1	0.00745708	4.77e-06	0.0490671	2.62e-06	7.85756	0.0803
6698	TC1725	0.00755595	4.19e-06	0.0495	2.83e-06	7.63342	0.096		8.74685	13.0845	0.0938012
6698	CPY-1	0.00742163	4.13e-06	0.0490745	2.54e-06	7.83468	0.0838
6698	TC1725	0.00746746	3.64e-06	0.049492	2.57e-06	7.66215	0.0837		8.58639	12.9233	0.0896328
6698	CPY-1	0.00750076	6.2e-06	0.0490669	2.53e-06	7.62847	0.0865
6698	TC1725	0.00746745	4.34e-06	0.0494719	2.6e-06	7.24866	0.0691		8.1473	12.4823	0.0927705
6698	CPY-1	0.00739342	4.18e-06	0.0490773	2.77e-06	7.72379	0.0957
6698	TC1725	0.0073877	5.05e-06	0.049499	2.85e-06	8.06177	0.0847		8.48519	12.8217	0.0999547
6698	CPY-1	0.0073511	5.87e-06	0.0490878	2.9e-06	7.7995	0.0699
6698	TC1725	0.00736897	4.81e-06	0.0495058	2.61e-06	7.59796	0.0865		8.52613	12.8628	0.0964116
6698	CPY-1	0.00739111	4.99e-06	0.0490868	2.7e-06	7.58695	0.0924
6698	TC1725	0.00749341	4.87e-06	0.0494971	2.68e-06	6.71411	0.119		8.3153	12.6511	0.0950112
6698	CPY-1	0.00735081	4.05e-06	0.049091	2.72e-06	7.76593	0.0878
6698	TC1725	0.00745376	4.98e-06	0.0494936	2.34e-06	7.53593	0.0849		8.19463	12.5299	0.092136
6698	CPY-1	0.00738323	5.16e-06	0.0490917	2.77e-06	7.90983	0.0886
6698	TC1725	0.00733795	3.93e-06	0.0495207	2.59e-06	7.92415	0.0956		8.53681	12.8735	0.0988742
6698	CPY-1	0.00723112	4.57e-06	0.0491113	3.05e-06	7.78787	0.0787
6698	TC1725	0.00728126	5.54e-06	0.0495261	3.18e-06	7.32351	0.111		8.70789	13.0453	0.106098
6698	CPY-1	0.00735646	4.9e-06	0.0490859	2.81e-06	7.48479	0.0923
6698	TC1725	0.00734498	9.41e-06	0.0495183	2.26e-06	7.58304	0.1		8.55776	12.8946	0.1115
6698	CPY-1	0.0072242	6.09e-06	0.0491104	4.13e-06	7.62379	0.0951
6698	TC1725	0.00720134	4.51e-06	0.049556	2.97e-06	7.18736	0.127		8.82406	13.162	0.121121
6698	CPY-1	0.0071244	4.48e-06	0.0491346	3.11e-06	7.69026	0.0924
6698	TC1725	0.00719692	5.37e-06	0.0495392	2.37e-06	6.74936	0.0976		8.35396	12.6899	0.0922302
6698	CPY-1	0.00723713	5.31e-06	0.049123	2.31e-06	7.70689	0.085
6698	TC1725	0.00721821	5.26e-06	0.0495367	2.56e-06	7.15593	0.115		8.3551	12.691	0.0938736
6698	CPY-1	0.00715698	5.93e-06	0.0491296	3.08e-06	7.6384	0.0839
6698	TC1725	0.00718222	4.72e-06	0.0495581	2.92e-06	7.70536	0.0931		8.6513	12.9885	0.102525
6698	CPY-1	0.00712393	5.24e-06	0.0491366	2.74e-06	7.68645	0.0851
6698	TC1725	0.00713405	5.43e-06	0.0495688	2.78e-06	7.52878	0.0607		8.61423	12.9513	0.0953727
6698	CPY-1	0.00704384	4.8e-06	0.0491542	2.62e-06	7.55336	0.0879
6698	TC1725	0.00708816	6.09e-06	0.0495807	2.71e-06	7.33121	0.0938		8.75024	13.0879	0.101403	12.7386	0.376036	n=139
6698	CPY-1	0.00709579	7.75e-06	0.0491471	3.28e-06	7.45071	0.0808
6705	CPY-1	0.00823467	1.14e-06	0.0489981	2.86e-06	5.79068	0.0605		mount 2
6705	TC1725	0.00827003	1.16e-06	0.0494055	2.96e-06	5.7196	0.0603		8.35093	12.6868	0.10439
6705	CPY-1	0.00823302	1.39e-06	0.0489946	3.06e-06	5.51604	0.0736
6705	TC1725	0.00826795	9.24e-07	0.04941	2.63e-06	6.00671	0.0665		8.39657	12.7327	0.0964121
6705	CPY-1	0.00822455	1.06e-06	0.0490026	2.48e-06	5.72057	0.0617
6705	TC1725	0.00826131	1.36e-06	0.0493942	2.95e-06	5.28318	0.0788		7.95439	12.2886	0.0923397
6705	CPY-1	0.00822535	1.11e-06	0.0490062	2.4e-06	5.74758	0.0645
6705	TC1725	0.00826446	1.19e-06	0.0494168	2.61e-06	5.92015	0.0773		8.37566	12.7117	0.08498
6705	CPY-1	0.00823374	1.3e-06	0.0490064	2.21e-06	6.06584	0.0586
6705	TC1725	0.0082759	1.18e-06	0.0494145	2.65e-06	5.21515	0.0309		8.38159	12.7176	0.0861971
6705	CPY-1	0.00824269	1.2e-06	0.0490012	2.46e-06	5.98345	0.063
6705	TC1725	0.00827634	1.35e-06	0.0494052	2.21e-06	5.98367	0.0715		8.15839	12.4935	0.093159
6705	CPY-1	0.00823607	1.29e-06	0.0490095	3.16e-06	5.85424	0.0549
6705	TC1725	0.00826069	1.32e-06	0.0494202	3.17e-06	5.34879	0.0813		8.31726	12.653	0.111481
6705	CPY-1	0.00822824	1.42e-06	0.0490156	3.16e-06	5.71743	0.0591
6705	TC1725	0.00826639	1.16e-06	0.049424	2.88e-06	6.06674	0.0883		8.47565	12.8121	0.0983818
6705	CPY-1	0.00823821	1.16e-06	0.0490016	2.26e-06	5.89941	0.0814
6705	TC1725	0.00827863	1.13e-06	0.049427	2.71e-06	5.91427	0.0833		8.65501	12.9922	0.0908825
6705	CPY-1	0.0082382	1.1e-06	0.0490041	2.74e-06	5.77006	0.087
6705	TC1725	0.00826739	1.32e-06	0.0494195	2.63e-06	5.56422	0.0606		8.43003	12.7663	0.0983904
6705	CPY-1	0.00823683	1.19e-06	0.0490086	2.99e-06	5.82995	0.0648
6705	TC1725	0.00827154	1.21e-06	0.0494234	3.04e-06	5.92514	0.0824		8.56064	12.8975	0.105384
6705	CPY-1	0.0082363	1.33e-06	0.0489992	2.94e-06	5.66542	0.0586
6705	TC1725	0.00826574	1.23e-06	0.0494172	2.58e-06	5.9394	0.0698		8.43258	12.7688	0.096405
6705	CPY-1	0.00823522	1.13e-06	0.0490087	2.67e-06	5.77769	0.0635
6705	TC1725	0.00827394	1.21e-06	0.0494152	2.45e-06	5.93776	0.068		8.28117	12.6168	0.0894846
6705	CPY-1	0.00824549	1.19e-06	0.04901	2.49e-06	6.24138	0.0683
6705	TC1725	0.00827506	1.04e-06	0.0494158	2.37e-06	5.8733	0.0722		8.29662	12.6323	0.0869919
6705	CPY-1	0.00823962	1.12e-06	0.0490083	2.54e-06	5.84488	0.0552
6705	TC1725	0.00826728	1.11e-06	0.0494109	2.65e-06	5.62653	0.0736		8.18922	12.5244	0.0930872
6705	CPY-1	0.00823334	1.26e-06	0.0490109	2.73e-06	6.08649	0.07
6705	TC1725	0.00826734	1.2e-06	0.0494258	2.38e-06	5.84994	0.0661		8.50291	12.8395	0.096409
6705	CPY-1	0.00824019	1.19e-06	0.0490073	3.05e-06	5.65365	0.061
6705	TC1725	0.00827923	1.31e-06	0.0494062	2.53e-06	5.32397	0.0532		8.11183	12.4467	0.100469
6705	CPY-1	0.00824029	1.12e-06	0.04901	2.94e-06	5.83702	0.0728
6705	TC1725	0.00827644	1.36e-06	0.0494156	2.73e-06	5.14157	0.0609		8.24418	12.5796	0.0972862
6705	CPY-1	0.00823992	1.32e-06	0.0490131	2.6e-06	5.91991	0.062
6705	TC1725	0.00827823	1.24e-06	0.0494101	2.7e-06	5.32653	0.0975		8.15408	12.4891	0.0914375
6705	CPY-1	0.00823878	1.16e-06	0.0490078	2.48e-06	5.86752	0.0555
6705	TC1725	0.00827116	1.45e-06	0.0494204	2.79e-06	5.88838	0.0623		8.35539	12.6913	0.0917186
6705	CPY-1	0.00824669	1.08e-06	0.049014	2.53e-06	5.80035	0.0657
6705	TC1725	0.00827959	1.09e-06	0.0494237	2.55e-06	5.81891	0.0855		8.46573	12.8021	0.0931944
6705	CPY-1	0.00823484	1.41e-06	0.0490035	2.84e-06	5.50717	0.0742
6705	TC1725	0.00827387	1.17e-06	0.0494213	3.05e-06	5.8155	0.074		8.49093	12.8274	0.0983195
6705	CPY-1	0.00824551	1.01e-06	0.0490069	2.45e-06	5.99695	0.0716
6705	TC1725	0.00828874	1.05e-06	0.049428	2.37e-06	6.1678	0.0772		8.5015	12.8381	0.0918975
6705	CPY-1	0.00824986	1.09e-06	0.0490158	2.96e-06	6.15754	0.0664
6705	TC1725	0.00828475	1.12e-06	0.0494323	2.49e-06	6.04737	0.0804		8.5487	12.8855	0.0925318
6705	CPY-1	0.00824339	1.1e-06	0.0490108	2.39e-06	6.17501	0.0646
6705	TC1725	0.00827896	1.03e-06	0.0494242	2.55e-06	5.78926	0.0827		8.37717	12.7132	0.0891113
6705	CPY-1	0.00823983	1.29e-06	0.0490163	2.64e-06	5.80656	0.0515
6705	TC1725	0.00827896	1.3e-06	0.0494248	2.53e-06	5.76798	0.0565		8.29292	12.6286	0.0974401
6705	CPY-1	0.00824899	1.17e-06	0.0490204	3.09e-06	5.96353	0.063
6705	TC1725	0.00827574	1.32e-06	0.0494269	2.74e-06	5.76849	0.0681		8.2608	12.5963	0.0994032
6705	CPY-1	0.00824064	1.24e-06	0.0490234	2.61e-06	6.3108	0.0683
6705	TC1725	0.00826452	1.5e-06	0.0494224	3.33e-06	5.64619	0.071		8.11861	12.4535	0.103586
6705	CPY-1	0.00823367	1.3e-06	0.0490254	2.84e-06	6.11637	0.0575
1755357	CPY-1	0.00825232	1.22e-06	0.049001	2.6e-06	6.43573	0.0821
1755357	TC1725	0.00829265	1.01e-06	0.0494339	3.04e-06	6.51227	0.0658		8.67139	13.0087	0.0953702
1755357	CPY-1	0.00824237	1.26e-06	0.0490168	2.45e-06	6.60755	0.0694
1755357	TC1725	0.0082728	1.21e-06	0.049439	2.52e-06	6.73067	0.0658		8.62057	12.9576	0.0853177
1755357	CPY-1	0.00823903	1.14e-06	0.0490162	2.29e-06	6.94226	0.069
1755357	TC1725	0.00828248	1.14e-06	0.0494466	2.47e-06	6.93949	0.0562		8.70925	13.0467	0.0854368
1755357	CPY-1	0.00824292	1.31e-06	0.0490232	2.51e-06	6.98873	0.0712
1755357	TC1725	0.00828721	8.97e-07	0.0494354	2.52e-06	7.50305	0.083		8.3988	12.7349	0.0832743
1755357	CPY-1	0.00825711	9.05e-07	0.0490242	2.03e-06	7.52026	0.0683
1755357	TC1725	0.00829013	8.95e-07	0.0494497	2.7e-06	7.76188	0.0619		8.70048	13.0379	0.0851773
1755357	CPY-1	0.00825015	9.41e-07	0.0490222	2.48e-06	7.50933	0.0726
1755357	TC1725	0.00828244	1.04e-06	0.0494346	2.72e-06	7.46604	0.0902		8.36028	12.6962	0.0894599
1755357	CPY-1	0.00824271	9.31e-07	0.0490272	2.41e-06	7.33867	0.0577
1755357	TC1725	0.00827717	9.17e-07	0.0494419	2.73e-06	7.4598	0.0729		8.46855	12.805	0.0874471
1755357	CPY-1	0.00825665	8.68e-07	0.0490262	2.29e-06	7.76108	0.0587
1755357	TC1725	0.00829459	1.05e-06	0.0494339	2.63e-06	7.60567	0.0666		8.26774	12.6033	0.0876064
1755357	CPY-1	0.00826042	1.02e-06	0.0490308	2.53e-06	7.85303	0.0606
1755357	TC1725	0.00829582	1.07e-06	0.0494334	2.55e-06	7.52716	0.0911		8.12491	12.4599	0.0871806
1755357	CPY-1	0.00825922	8.54e-07	0.0490392	2.34e-06	7.82035	0.0526
1755357	TC1725	0.00829555	1.08e-06	0.0494413	2.15e-06	7.89077	0.0727		8.22012	12.5555	0.0781548
1755357	CPY-1	0.00825883	8.3e-07	0.0490373	2.16e-06	7.95188	0.0718
1755357	TC1725	0.00828453	9.88e-07	0.0494381	2.82e-06	7.70502	0.0816		8.23351	12.5689	0.084895
1755357	CPY-1	0.00824701	1.06e-06	0.0490315	2.2e-06	7.92614	0.0739
1755357	TC1725	0.0082806	1.05e-06	0.0494429	2.7e-06	7.52935	0.0702		8.36584	12.7018	0.0842668
1755357	CPY-1	0.0082483	9.11e-07	0.049034	2.25e-06	7.76979	0.0524
1755357	TC1725	0.00828572	9.79e-07	0.0494424	2.41e-06	7.95058	0.0694		8.30887	12.6446	0.086939
1755357	CPY-1	0.00825503	9.35e-07	0.0490359	2.72e-06	7.90945	0.0611
1755357	TC1725	0.00829151	1.17e-06	0.0494413	2.6e-06	7.61384	0.061		8.23831	12.5737	0.0913147
1755357	CPY-1	0.00826125	8.65e-07	0.0490388	2.45e-06	8.03613	0.0689
1755357	TC1725	0.00828821	6.9e-07	0.0494662	1.65e-06	27.7641	0.184		8.52954	12.8662	0.0750877
1755357	CPY-1	0.00825658	9.89e-07	0.0490568	2.21e-06	8.16814	0.0627
1755357	TC1725	0.00828613	1.13e-06	0.0494408	2.43e-06	7.83699	0.0735		7.94343	12.2776	0.0849257
1755357	CPY-1	0.00825557	9.7e-07	0.0490456	2.58e-06	8.1047	0.0634
1755357	TC1725	0.00829409	6.67e-07	0.0494583	1.85e-06	15.4828	0.114		8.3256	12.6614	0.0791845
1755357	CPY-1	0.00826205	9.25e-07	0.0490543	2.25e-06	8.41455	0.0673
1755357	TC1725	0.00829313	9.36e-07	0.0494461	2.59e-06	8.2086	0.0705		8.05015	12.3848	0.0830429
1755357	CPY-1	0.00826315	9.91e-07	0.0490482	2.22e-06	8.22944	0.0667
1755357	TC1725	0.00829565	9.01e-07	0.0494495	2.27e-06	8.06768	0.061		8.20179	12.5371	0.0767198
1755357	CPY-1	0.00825966	1e-06	0.0490462	2.04e-06	8.07923	0.0601
1755357	TC1725	0.00828967	1.04e-06	0.0494442	2.73e-06	7.90399	0.0696		8.14747	12.4825	0.0801563
1755357	CPY-1	0.00825937	8.34e-07	0.0490431	1.99e-06	8.07982	0.0601
1755357	TC1725	0.00830122	6.67e-07	0.0494581	1.78e-06	13.8182	0.0633		8.30796	12.6437	0.0707674
1755357	CPY-1	0.00826858	9.75e-07	0.049058	2.23e-06	8.39813	0.0625
1755357	TC1725	0.00830388	9.39e-07	0.0494614	2.6e-06	8.26347	0.0715		8.25374	12.5892	0.0822698
1755357	CPY-1	0.00827017	8.92e-07	0.049055	2.16e-06	8.38544	0.0657
1755357	TC1725	0.00830097	9.8e-07	0.0494557	2.36e-06	8.16485	0.0669		8.28257	12.6182	0.0768922
1755357	CPY-1	0.0082665	8.28e-07	0.0490438	2.02e-06	8.20171	0.0779
1755357	TC1725	0.0082913	9.23e-07	0.0494523	2.35e-06	7.90818	0.0692		8.25137	12.5869	0.0761906
1755357	CPY-1	0.00826296	1.07e-06	0.0490513	2.11e-06	8.0685	0.0619
1755357	TC1725	0.00830313	8.07e-07	0.0494466	2.49e-06	7.6749	0.0818		8.03075	12.3653	0.0815007
1755357	CPY-1	0.00826946	8.24e-07	0.049054	2.33e-06	8.20805	0.064
1755357	TC1725	0.00830658	9.71e-07	0.0494618	2.12e-06	8.09843	0.0787		8.33898	12.6748	0.0792008
1755357	CPY-1	0.00827327	9.44e-07	0.0490515	2.29e-06	8.32951	0.0691
1755357	TC1725	0.00830168	8.09e-07	0.0494595	2.22e-06	8.17641	0.0702		8.27504	12.6106	0.0769648
1755357	CPY-1	0.00826983	8.91e-07	0.0490556	2.04e-06	8.3034	0.0553
1755357	TC1725	0.00829327	9.11e-07	0.0494573	2.47e-06	7.9598	0.0711		8.16884	12.504	0.0817139
1755357	CPY-1	0.00826555	9.38e-07	0.0490575	2.43e-06	7.98808	0.0542
1755357	TC1725	0.00830519	8.96e-07	0.0494633	2.29e-06	8.02006	0.0722		8.28467	12.6203	0.0827824
1755357	CPY-1	0.0082728	9.67e-07	0.0490562	2.33e-06	8.47542	0.0649
1755357	TC1725	0.00830691	1.1e-06	0.0494686	2.48e-06	7.99809	0.0498		8.37688	12.7129	0.0808232
1755357	CPY-1	0.00827396	8.69e-07	0.0490591	2.06e-06	8.31032	0.0597
1755357	TC1725	0.00830312	8.78e-07	0.0494617	2.66e-06	7.80541	0.0617		8.25287	12.5884	0.0837215
1755357	CPY-1	0.00826273	9.19e-07	0.0490546	2.38e-06	8.08084	0.0682
1755357	TC1725	0.00829814	1.06e-06	0.0494558	2.51e-06	7.66302	0.0634		8.12767	12.4626	0.0868753
1755357	CPY-1	0.00826746	9.71e-07	0.0490595	2.51e-06	7.67612	0.0574
1755357	TC1725	0.00830509	9.63e-07	0.0494554	2.44e-06	7.92612	0.0735		8.19649	12.5317	0.0847051
1755357	CPY-1	0.00827082	8.99e-07	0.0490471	2.26e-06	8.5363	0.0825
1755357	TC1725	0.00830815	9.14e-07	0.0494673	2.24e-06	8.06629	0.061		8.4476	12.7839	0.0812834
1755357	CPY-1	0.00827078	9.34e-07	0.0490588	2.42e-06	8.3251	0.0664
1755357	TC1725	0.00830742	8.43e-07	0.0494591	2.18e-06	8.1045	0.0638		8.18642	12.5216	0.0782457
1755357	CPY-1	0.00826677	1.07e-06	0.0490561	2.05e-06	8.11186	0.0724
1755357	TC1725	0.00830257	9.11e-07	0.0494619	2.45e-06	8.09562	0.0707		8.20301	12.5383	0.0775531
1755357	CPY-1	0.00826982	8.88e-07	0.0490627	2.09e-06	8.38795	0.075
1755357	TC1725	0.00830675	8.63e-07	0.049463	2.3e-06	8.12012	0.0845		8.22881	12.5642	0.0756515
1755357	CPY-1	0.00827184	1.13e-06	0.049056	2.05e-06	8.43998	0.077
1755357	TC1725	0.00830297	5.46e-07	0.0494772	1.73e-06	26.2373	0.161		8.2063	12.5416	0.0717271
1755357	CPY-1	0.0082718	8.58e-07	0.049093	2.29e-06	8.79575	0.0568
1755357	TC1725	0.00830477	4.38e-07	0.0494873	1.79e-06	26.8454	0.18		8.02974	12.3643	0.0779576
1755357	CPY-1	0.00827738	9.04e-07	0.0490933	2.5e-06	8.74863	0.0711
1755357	TC1725	0.00830562	1.05e-06	0.0494779	2.04e-06	8.18983	0.0712		7.99647	12.3309	0.0790455
1755357	CPY-1	0.00827005	9.5e-07	0.0490775	2.17e-06	8.25169	0.0644
1755357	TC1725	0.00830922	8.77e-07	0.0494717	2.37e-06	7.95477	0.0832		8.06002	12.3947	0.0749022
1755357	CPY-1	0.00827589	8.37e-07	0.0490748	1.81e-06	8.55082	0.0708
1755357	TC1725	0.00831187	8.62e-07	0.0494739	2.48e-06	7.91039	0.0813		8.1483	12.4833	0.0770589
1755357	CPY-1	0.00827811	8.47e-07	0.0490733	2.23e-06	8.28733	0.0743
1755357	TC1725	0.00831147	8.88e-07	0.0494826	2.16e-06	8.24501	0.0677		8.31049	12.6462	0.0800128
1755357	CPY-1	0.00827437	9.16e-07	0.0490762	2.42e-06	8.26069	0.0713
1755357	TC1725	0.0083044	1.01e-06	0.0494718	2.36e-06	7.95749	0.0757		8.05374	12.3884	0.0806444
1755357	CPY-1	0.00827444	8.3e-07	0.049077	2.08e-06	8.3577	0.073
1755357	TC1725	0.00831239	8.78e-07	0.0494766	2.1e-06	8.17023	0.07		8.19633	12.5316	0.0771367
1755357	CPY-1	0.00827591	8.48e-07	0.0490718	2.38e-06	8.35049	0.0709
1755357	TC1725	0.008313	9.02e-07	0.0494749	2.44e-06	8.03203	0.0662		8.14495	12.48	0.0818756
1755357	CPY-1	0.00827997	8.21e-07	0.0490786	2.15e-06	8.33116	0.0656
1755357	TC1725	0.00830629	9.58e-07	0.0494759	2.28e-06	7.86878	0.0622		8.17292	12.5081	0.0798458
1755357	CPY-1	0.00827634	9.31e-07	0.0490711	2.37e-06	8.29065	0.0839
1755357	TC1725	0.00830635	1.03e-06	0.049467	2.22e-06	7.71783	0.0809		8.0264	12.3609	0.082331
1755357	CPY-1	0.00827025	7.95e-07	0.0490751	2.42e-06	8.259	0.058
1755388	TC1725	0.00831429	9.88e-07	0.0494793	1.62e-06	8.0422	0.0657		8.26994	12.6055	0.0793055
1755388	CPY-1	0.0082775	1e-06	0.0490719	2.59e-06	8.06422	0.089
1755388	TC1725	0.00831474	8.72e-07	0.0494769	2.02e-06	8.22576	0.0813		8.30004	12.6357	0.0790539
1755388	CPY-1	0.00827812	9.12e-07	0.0490674	2.08e-06	8.07713	0.0862
1755388	TC1725	0.00831323	1.02e-06	0.0494697	2.59e-06	7.37467	0.085		8.19975	12.535	0.0827731
1755388	CPY-1	0.00827596	9.17e-07	0.0490673	2.36e-06	7.91401	0.0698
1755388	TC1725	0.00831006	9.14e-07	0.049475	2.25e-06	7.81175	0.0779		8.32708	12.6629	0.0796086
1755388	CPY-1	0.00827861	8.22e-07	0.0490656	2.17e-06	7.99223	0.0586
1755388	TC1725	0.00831259	9.32e-07	0.0494785	2.25e-06	8.16511	0.083		8.31077	12.6465	0.0774411
1755388	CPY-1	0.00827759	9.61e-07	0.0490758	2.18e-06	8.48848	0.0704
1755388	TC1725	0.00830758	8.35e-07	0.049476	2.85e-06	7.66454	0.0943		8.18278	12.518	0.0848123
1755388	CPY-1	0.00827473	8.36e-07	0.049073	2.14e-06	8.20448	0.0736
1755388	TC1725	0.00831198	8.9e-07	0.0494617	2.6e-06	7.84962	0.0868		8.00465	12.3391	0.0809288
1755388	CPY-1	0.00827177	9.76e-07	0.0490649	2.13e-06	8.00221	0.0749
1755388	TC1725	0.00830576	1.03e-06	0.0494643	2.44e-06	7.72041	0.0666		8.17425	12.5094	0.0817984
1755388	CPY-1	0.00827821	9.8e-07	0.0490616	2.39e-06	8.06273	0.063
1755388	TC1725	0.00830758	9.75e-07	0.0494646	2.68e-06	7.60194	0.0722		8.22712	12.5625	0.0853408
1755388	CPY-1	0.00827538	9.45e-07	0.0490603	2.18e-06	7.90671	0.0728
1755388	TC1725	0.00830815	9.14e-07	0.0494658	2.77e-06	7.58606	0.0785		8.28035	12.616	0.0885058
1755388	CPY-1	0.00827332	1.01e-06	0.0490588	2.56e-06	7.9006	0.0661
1755388	TC1725	0.00830857	9.53e-07	0.0494703	2.51e-06	7.8071	0.0814		8.33775	12.6736	0.0875795
1755388	CPY-1	0.00826687	7.92e-07	0.0490636	2.39e-06	7.65486	0.0699
1755388	TC1725	0.00830176	1.04e-06	0.0494712	2.26e-06	7.61072	0.0716		8.2933	12.629	0.0807808
1755388	CPY-1	0.00827223	1.02e-06	0.049065	2.23e-06	7.77247	0.07
1755388	TC1725	0.0083076	1.04e-06	0.0494717	2.26e-06	7.72932	0.089		8.29846	12.6341	0.0839513
1755388	CPY-1	0.00826795	1.05e-06	0.0490641	2.64e-06	8.05354	0.0875
1755388	TC1725	0.00830535	9.79e-07	0.0494756	2.44e-06	8.17538	0.0788		8.35144	12.6874	0.0848183
1755388	CPY-1	0.00827142	9.68e-07	0.0490674	2.12e-06	7.85843	0.077
1755388	TC1725	0.00829877	9.63e-07	0.0494679	2.52e-06	7.64057	0.0908		8.17632	12.5115	0.0830328
1755388	CPY-1	0.00826968	1.06e-06	0.0490659	2.42e-06	7.68905	0.0769
1755388	TC1725	0.00830503	9.8e-07	0.0494772	2.42e-06	7.80903	0.0746		8.34838	12.6843	0.0831193
1755388	CPY-1	0.00827062	1.01e-06	0.0490692	2.24e-06	7.66261	0.0673
1755388	TC1725	0.00830317	9.15e-07	0.0494667	2.84e-06	7.52703	0.0691		8.1229	12.4578	0.0854405
1755388	CPY-1	0.00826769	1.05e-06	0.0490669	2.15e-06	8.00743	0.0745
1755388	TC1725	0.00830334	9.07e-07	0.0494764	2.34e-06	8.15048	0.07		8.27331	12.6089	0.0795889
1755388	CPY-1	0.00827119	8.55e-07	0.0490739	2.29e-06	8.13202	0.0688
1755388	TC1725	0.00830754	9.67e-07	0.0494798	2.25e-06	8.25695	0.0837		8.26525	12.6008	0.0833391
1755388	CPY-1	0.00827562	1.03e-06	0.0490744	2.55e-06	8.01559	0.0714
1755388	TC1725	0.00830157	1.04e-06	0.0494759	2.71e-06	7.70763	0.0705		8.27443	12.61	0.087915
1755388	CPY-1	0.00826937	9.11e-07	0.0490653	2.21e-06	7.85285	0.0836
1755388	TC1725	0.00831492	1.03e-06	0.0494759	2.63e-06	7.8261	0.0822		8.24914	12.5846	0.0834047
1755388	CPY-1	0.00827374	1.01e-06	0.049077	2.25e-06	8.17008	0.0642
1755388	TC1725	0.00830516	8.22e-07	0.0494806	2.42e-06	8.11251	0.0857		8.23172	12.5671	0.0797493
1755388	CPY-1	0.00827318	9.81e-07	0.0490763	2.12e-06	8.08814	0.0614
1755388	TC1725	0.00830449	1.1e-06	0.0494771	2.59e-06	7.57285	0.0783		8.23117	12.5666	0.0846204
1755388	CPY-1	0.00827254	1.01e-06	0.0490702	2.48e-06	7.7062	0.0793
1755388	TC1725	0.00829717	8.7e-07	0.0494772	2.52e-06	7.65085	0.0743		8.30985	12.6456	0.0869521
1755388	CPY-1	0.00826901	1.1e-06	0.0490688	2.41e-06	7.51527	0.0619
1755388	TC1725	0.00830421	8.66e-07	0.0494836	2.48e-06	7.98786	0.0634		8.3808	12.7168	0.0890422
1755388	CPY-1	0.00826839	8.95e-07	0.0490759	2.69e-06	7.90527	0.0754
1755388	TC1725	0.0082942	9.6e-07	0.0494788	2.65e-06	7.94399	0.0857		8.20779	12.5431	0.0867974
1755388	CPY-1	0.00826356	1.02e-06	0.0490761	2e-06	7.9905	0.0637
1755388	TC1725	0.0082911	1.11e-06	0.0494788	2.77e-06	7.82475	0.0869		8.19134	12.5266	0.0886939
1755388	CPY-1	0.00826762	1.06e-06	0.0490776	2.72e-06	7.7803	0.0779
1755388	TC1725	0.00829252	9.54e-07	0.0494864	2.1e-06	8.15876	0.0701		8.37867	12.7147	0.0877566
1755388	CPY-1	0.00826134	1.05e-06	0.0490729	2.61e-06	7.70538	0.0656
1755388	TC1725	0.00829534	1.01e-06	0.0494839	2.52e-06	8.0496	0.0782		8.29618	12.6319	0.0933993
1755388	CPY-1	0.00824589	8.87e-07	0.0490807	2.82e-06	7.85592	0.0762
1755388	TC1725	0.0082805	1.24e-06	0.0494871	2.15e-06	8.13963	0.0784		8.30541	12.6411	0.0892958
1755388	CPY-1	0.00824458	1.3e-06	0.0490782	2.59e-06	7.65643	0.0843
1755388	TC1725	0.00828475	1.1e-06	0.0494799	2.31e-06	7.64054	0.0722		8.20545	12.5407	0.0849625
1755388	CPY-1	0.00825763	1e-06	0.0490761	2.33e-06	7.49807	0.0813
1755388	TC1725	0.00829241	1.19e-06	0.0494931	2.48e-06	7.7832	0.0813		8.46999	12.8064	0.0886512
1755388	CPY-1	0.00825763	8.82e-07	0.0490787	2.73e-06	7.64905	0.0796
1755388	TC1725	0.00829184	1e-06	0.0495005	2.47e-06	8.60595	0.0684		8.52172	12.8584	0.0898625
1755388	CPY-1	0.00825388	1.05e-06	0.0490857	2.45e-06	7.89394	0.0685
1755388	TC1725	0.00828305	1.1e-06	0.0494977	2.27e-06	7.91573	0.0659		8.44002	12.7763	0.0824042
1755388	CPY-1	0.00824755	1e-06	0.0490812	2.3e-06	7.5999	0.0745
1755388	TC1725	0.00828305	1.07e-06	0.0494928	2.65e-06	7.90256	0.0673		8.42053	12.7567	0.0869191
1755388	CPY-1	0.00824681	1.05e-06	0.0490778	2.45e-06	7.48341	0.0827
1755388	TC1725	0.00828008	1.16e-06	0.0495028	2.35e-06	8.1501	0.0748		8.5508	12.8876	0.0862796
1755388	CPY-1	0.00825332	1.01e-06	0.0490885	2.55e-06	8.22481	0.0573
1755388	TC1725	0.00828276	1.08e-06	0.0495013	2.51e-06	8.22446	0.0738		8.44566	12.782	0.0910785
1755388	CPY-1	0.00824623	1.17e-06	0.049085	2.7e-06	8.06782	0.0675
1755388	TC1725	0.00828857	8.72e-07	0.049506	2.44e-06	8.03908	0.0739		8.5262	12.8629	0.0892533
1755388	CPY-1	0.0082372	1.06e-06	0.04909	2.46e-06	7.79887	0.0536
1755388	TC1725	0.00828639	6.57e-07	0.0495266	1.7e-06	33.7139	0.184		8.54378	12.8805	0.0837152
1755388	CPY-1	0.00824907	1.12e-06	0.0491241	2.83e-06	8.18982	0.0683
1755388	TC1725	0.00828317	9.39e-07	0.0495103	2.09e-06	8.69074	0.0687		8.11671	12.4516	0.0859744
1755388	CPY-1	0.00825029	1e-06	0.0490992	2.35e-06	8.17352	0.0759
1755388	TC1725	0.00828581	1.23e-06	0.0495107	2.68e-06	8.45609	0.0775		8.35337	12.6893	0.0844872
1755388	CPY-1	0.00823596	1.17e-06	0.0491019	2.15e-06	7.96501	0.0648
1755388	TC1725	0.00825887	1.16e-06	0.0495095	2.62e-06	8.12569	0.0698		8.38735	12.7234	0.0840707
1755388	CPY-1	0.00824824	1.21e-06	0.0490936	2.38e-06	7.68135	0.0686
1755388	TC1725	0.00827677	9.36e-07	0.0495164	2.1e-06	8.39546	0.0699		8.66411	13.0014	0.0772111
1755388	CPY-1	0.00825096	1.07e-06	0.0490885	2.09e-06	7.5496	0.0677
1755388	TC1725	0.0082923	1.08e-06	0.0495182	2.32e-06	8.77914	0.0757		8.72923	13.0668	0.0759518
1755388	CPY-1	0.00825179	1.18e-06	0.0490909	2.06e-06	7.66251	0.0687
1755388	TC1725	0.0082754	1.08e-06	0.0495089	2.5e-06	7.94878	0.0838		8.4534	12.7898	0.0832127
1755388	CPY-1	0.00824466	1.18e-06	0.0490968	2.51e-06	7.62408	0.0604
1755388	TC1725	0.00828682	1.12e-06	0.0495167	2.6e-06	8.27201	0.0807		8.62182	12.9589	0.086222
1755388	CPY-1	0.00825063	9.1e-07	0.0490902	2.23e-06	7.58429	0.0767
1755388	TC1725	0.00829621	9.86e-07	0.0495206	2.22e-06	8.30052	0.068		8.73189	13.0694	0.0825452
1755388	CPY-1	0.00824388	1.03e-06	0.0490936	2.57e-06	7.20198	0.062
1755388	TC1725	0.00828487	8.71e-07	0.0495138	2.28e-06	7.96	0.0633		8.587	12.9239	0.0925772
1755388	CPY-1	0.00825424	9.92e-07	0.0490908	2.99e-06	7.327	0.069
1755388	TC1725	0.0082842	9.68e-07	0.0495167	2.14e-06	9.50454	0.116		8.72796	13.0655	0.0893762
1755388	CPY-1	0.00824027	1.18e-06	0.0490857	2.41e-06	7.10085	0.0878
1755416	TC1725	0.00827605	7.62e-07	0.0495353	1.58e-06	31.2169	0.164		8.73215	13.0697	0.0818513
1755416	CPY-1	0.00822901	1.34e-06	0.0491272	2.81e-06	7.57272	0.0646
1755416	TC1725	0.00827762	6.86e-07	0.0495273	1.83e-06	26.8971	0.0975		8.09953	12.4344	0.0891893
1755416	CPY-1	0.00824324	1.07e-06	0.0491316	2.83e-06	7.59856	0.0647
1755416	TC1725	0.00827621	8.89e-07	0.0495338	1.49e-06	28.0747	0.144		8.17243	12.5076	0.0780026
1755416	CPY-1	0.00823172	1.29e-06	0.049133	2.12e-06	7.96751	0.0742
1755416	TC1725	0.0082595	1.07e-06	0.0495264	2.04e-06	8.48075	0.059		8.21388	12.5492	0.0749671
1755416	CPY-1	0.00820599	1.26e-06	0.0491129	2.23e-06	7.61076	0.0799
1755416	TC1725	0.00825717	1.14e-06	0.0495278	2.37e-06	8.55673	0.0699		8.44141	12.7777	0.0819727	12.6518	0.355803	n=130
1755416	CPY-1	0.0082321	9.08e-07	0.0491136	2.39e-06	7.67614	0.0759
6700	CPY-1	0.00817976	1.3e-06	0.0490246	2.71e-06	6.28913	0.0649		mount 3
6700	TC1725	0.0082275	1.66e-06	0.0494218	2.58e-06	6.15971	0.0811		8.17825	12.5134	0.0917822
6700	CPY-1	0.00818496	1.48e-06	0.0490172	2.52e-06	6.39346	0.0668
6700	TC1725	0.00823483	1.45e-06	0.0494322	3.28e-06	6.01173	0.064		8.44172	12.778	0.0983243
6700	CPY-1	0.0081996	1.36e-06	0.0490197	2.51e-06	6.53659	0.0752
6700	TC1725	0.00822951	1.53e-06	0.0494298	2.6e-06	6.25452	0.0749		8.36439	12.7004	0.089735
6700	CPY-1	0.00820541	1.58e-06	0.0490198	2.53e-06	6.47635	0.0766
6700	TC1725	0.008235	1.36e-06	0.0494334	2.85e-06	6.27617	0.0766		8.41405	12.7502	0.0943921
6700	CPY-1	0.00818284	1.54e-06	0.0490221	2.65e-06	6.40789	0.0686
6700	TC1725	0.00820891	1.57e-06	0.0494378	3.02e-06	6.41956	0.0781		8.45681	12.7932	0.0999307
6700	CPY-1	0.00818389	1.38e-06	0.0490243	2.83e-06	6.43908	0.0676
6700	TC1725	0.00821521	1.46e-06	0.0494357	2.86e-06	6.30853	0.0726		8.4186	12.7548	0.0987824
6700	CPY-1	0.00820248	1.57e-06	0.0490217	2.72e-06	6.45953	0.0663
6700	TC1725	0.00824769	1.4e-06	0.0494297	2.24e-06	6.06193	0.0701		8.38816	12.7242	0.088179
6700	CPY-1	0.00819248	1.42e-06	0.0490152	2.52e-06	6.2319	0.0554
6700	TC1725	0.00821283	1.57e-06	0.0494143	2.62e-06	5.79907	0.0857		8.05414	12.3888	0.0899823
6700	CPY-1	0.00816556	1.58e-06	0.0490238	2.52e-06	6.59754	0.0701
6700	TC1725	0.00819564	1.54e-06	0.0494273	2.56e-06	6.29541	0.102		8.24623	12.5817	0.0934266
6700	CPY-1	0.0081599	1.72e-06	0.0490222	2.86e-06	6.51036	0.0847
6700	TC1725	0.00822141	1.76e-06	0.0494272	2.72e-06	5.90937	0.0738		8.23977	12.5752	0.0957018
6700	CPY-1	0.00820281	1.47e-06	0.0490242	2.56e-06	6.51062	0.0806
6700	TC1725	0.00820969	1.62e-06	0.0494422	2.57e-06	6.51837	0.0637		8.54904	12.8858	0.0907839
6700	CPY-1	0.00818362	1.75e-06	0.0490219	2.6e-06	6.54796	0.0708
6700	TC1725	0.00821418	1.68e-06	0.0494368	2.77e-06	6.32872	0.0761		8.42366	12.7599	0.0909381
6700	CPY-1	0.00816578	1.63e-06	0.0490257	2.36e-06	6.67449	0.0776
6700	TC1725	0.00818951	1.52e-06	0.0494657	1.51e-06	24.4225	0.283		8.70771	13.0452	0.0843527
6700	CPY-1	0.00817103	1.55e-06	0.0490517	3.05e-06	6.47679	0.08
6700	TC1725	0.00821981	1.37e-06	0.049442	2.13e-06	6.67132	0.0638		8.12338	12.4583	0.0930854
6700	CPY-1	0.00817501	1.86e-06	0.0490355	2.66e-06	6.49515	0.0716
6701	TC1725	0.0080477	2.31e-06	0.0494575	1.46e-06	7.00206	0.265		8.35473	12.6907	0.0808517
6701	CPY-1	0.00803687	2.51e-06	0.0490598	2.56e-06	7.00612	0.0681
6701	TC1725	0.00803816	2.42e-06	0.0494462	2.62e-06	6.62803	0.0768		7.98643	12.3208	0.0930113
6701	CPY-1	0.0080441	2.12e-06	0.0490491	2.74e-06	6.83017	0.081
6701	TC1725	0.00803509	2.38e-06	0.0494513	2.68e-06	6.89917	0.0725		8.24518	12.5806	0.0906578
6701	CPY-1	0.00798863	3.55e-06	0.0490446	2.28e-06	6.89318	0.0653
6701	TC1725	0.00804376	2.48e-06	0.0494573	3.03e-06	5.92938	0.0694		8.4884	12.8249	0.0893452
6701	CPY-1	0.00803857	2.8e-06	0.0490374	2.23e-06	6.82221	0.0747
6701	TC1725	0.00807051	2.42e-06	0.0494384	3.04e-06	6.15072	0.0685		8.09223	12.427	0.0904664
6701	CPY-1	0.00806312	2.57e-06	0.0490456	2.37e-06	6.76321	0.0714
6701	TC1725	0.00808803	2.2e-06	0.0494376	2.66e-06	6.30291	0.0779		8.07117	12.4059	0.0904014
6701	CPY-1	0.00809399	2.04e-06	0.049038	2.66e-06	6.58685	0.0703
6701	TC1725	0.00809497	1.89e-06	0.0494363	2.61e-06	6.21175	0.0671		8.05217	12.3868	0.094688
6701	CPY-1	0.00803298	2.88e-06	0.0490448	2.79e-06	6.93224	0.0676
6701	TC1725	0.00808541	2.18e-06	0.0494433	2.61e-06	6.25174	0.0837		8.13993	12.4749	0.0994497
6701	CPY-1	0.00804144	2.19e-06	0.0490433	3.05e-06	6.6128	0.0752
6701	TC1725	0.00808347	2.48e-06	0.049452	2.35e-06	6.62911	0.0703		8.34044	12.6763	0.0920918
6701	CPY-1	0.00802647	2.85e-06	0.0490427	2.38e-06	6.66288	0.0726
6701	TC1725	0.00808281	2.34e-06	0.0494505	1.34e-06	7.28955	0.222		8.02333	12.3578	0.0796568
6701	CPY-1	0.00805795	2.16e-06	0.0490712	2.8e-06	6.96995	0.075
6701	TC1725	0.00808753	3.09e-06	0.0494952	2.63e-06	6.21628	0.105		8.79705	13.1349	0.092704
6701	CPY-1	0.00808512	1.86e-06	0.049056	2.46e-06	6.83538	0.0686
6701	TC1725	0.00815726	2.8e-06	0.0494443	2.45e-06	6.06327	0.0739		8.02106	12.3556	0.0865201
6701	CPY-1	0.00810738	1.81e-06	0.0490457	2.46e-06	6.51335	0.0749
6711	CPY-1	0.00831592	1.13e-06	0.0491687	2.57e-06	6.21609	0.0588
6711	PSPT-1	0.00834442	1.31e-06	0.0495716	3.08e-06	5.37921	0.0735		8.16902	12.5041	0.0979046
6711	CPY-1	0.00831264	1.02e-06	0.0491712	2.69e-06	6.03365	0.0502
6711	TC1725	0.00834571	1.17e-06	0.0495755	2.73e-06	5.56907	0.0551		8.14346	12.4785	0.0938022
6711	CPY-1	0.00831332	1.02e-06	0.0491789	2.59e-06	6.22685	0.0689
6711	PSPT-1	0.00834727	1.24e-06	0.0495843	3.08e-06	5.70869	0.0538		8.18741	12.5226	0.0942137
6711	CPY-1	0.0083154	1.18e-06	0.0491843	2.33e-06	6.42611	0.0619
6711	TC1725	0.00834912	1.46e-06	0.0495799	2.61e-06	5.70345	0.0743		8.1623	12.4974	0.0850964
6711	CPY-1	0.00831454	9.14e-07	0.0491728	2.32e-06	6.16867	0.0677
6711	PSPT-1	0.00835011	1.03e-06	0.0495905	2.73e-06	5.66945	0.0546		8.44081	12.7771	0.0869457
6711	CPY-1	0.00831307	1.19e-06	0.049178	2.36e-06	5.91162	0.0566
6711	TC1725	0.00834715	1.08e-06	0.0495918	2.83e-06	5.8772	0.061		8.45781	12.7942	0.0897894
6711	CPY-1	0.00831428	1.05e-06	0.0491737	2.46e-06	6.14513	0.0605
6711	PSPT-1	0.00835051	8.56e-07	0.0495822	3.27e-06	5.86804	0.0632		8.25202	12.5875	0.0955802
6711	CPY-1	0.00831617	1.27e-06	0.0491792	2.35e-06	6.23023	0.0546
6711	TC1725	0.00834753	1.06e-06	0.0495789	2.89e-06	5.76415	0.0686		8.15499	12.4901	0.0993113
6711	CPY-1	0.00831479	1.23e-06	0.0491766	3.18e-06	6.17956	0.0561
6711	PSPT-1	0.00834971	1.15e-06	0.0495883	2.84e-06	5.73166	0.066		8.40857	12.7447	0.100026
6711	CPY-1	0.00831327	1.12e-06	0.0491731	2.48e-06	5.89669	0.0663
6711	TC1725	0.00834915	1.12e-06	0.0495875	2.91e-06	5.7008	0.0704		8.38236	12.7184	0.0939457
6711	CPY-1	0.0083138	1.01e-06	0.0491775	2.62e-06	5.98769	0.0604
6711	PSPT-1	0.0083539	1.29e-06	0.0495922	2.63e-06	6.2088	0.0635		8.36218	12.6981	0.0950372
6711	CPY-1	0.00831642	1.22e-06	0.0491844	2.86e-06	6.05093	0.0585
6711	TC1725	0.00834748	9.73e-07	0.0495876	2.55e-06	5.88457	0.0691		8.37475	12.7108	0.0941555
6711	CPY-1	0.00831346	1.19e-06	0.0491672	2.62e-06	5.73407	0.0552
6711	PSPT-1	0.00834906	1.11e-06	0.0495788	2.57e-06	5.7517	0.0688		8.24081	12.5762	0.0905208
6711	CPY-1	0.00831168	9.47e-07	0.04918	2.54e-06	6.10732	0.0689
6711	TC1725	0.00834505	1.17e-06	0.0495843	2.8e-06	5.7543	0.062		8.23865	12.5741	0.0967346
6711	CPY-1	0.00830943	1.28e-06	0.0491783	2.91e-06	5.82899	0.0518
6711	PSPT-1	0.00834637	1.29e-06	0.0495873	2.99e-06	5.59536	0.0719		8.289	12.6246	0.0959772
6711	CPY-1	0.0083147	1.28e-06	0.049181	2.24e-06	6.00324	0.0468
6711	TC1725	0.00834549	1.11e-06	0.0495781	2.81e-06	5.64224	0.0606		8.07826	12.413	0.0846322
6711	CPY-1	0.0083138	1e-06	0.0491806	2.13e-06	6.09178	0.0572
6711	PSPT-1	0.00834954	1.22e-06	0.0495799	2.85e-06	5.7113	0.0593		8.10296	12.4378	0.0902736
6711	CPY-1	0.00831245	1.14e-06	0.0491822	2.68e-06	5.88378	0.0569
6711	TC1725	0.008349	1.17e-06	0.0495818	2.57e-06	5.89907	0.065		8.21201	12.5473	0.0920499
6711	CPY-1	0.008314	1.06e-06	0.0491737	2.61e-06	5.85403	0.0724
6711	PSPT-1	0.00834911	1.06e-06	0.0495783	2.79e-06	5.67151	0.0699		8.10354	12.4384	0.0927846
6711	CPY-1	0.00831525	1.28e-06	0.0491857	2.52e-06	5.77147	0.0619
6711	TC1725	0.00834748	9.38e-07	0.0495817	2.41e-06	5.62741	0.0561		8.09027	12.4251	0.0895754
6711	CPY-1	0.00831498	1.04e-06	0.0491819	2.71e-06	5.91734	0.0688
6711	PSPT-1	0.00835248	1.15e-06	0.0495852	2.95e-06	6.02108	0.0636		8.29868	12.6344	0.0950682
6711	CPY-1	0.00831393	1.33e-06	0.0491723	2.44e-06	5.8868	0.0872
6711	TC1725	0.00835011	1.2e-06	0.0495832	2.75e-06	5.7607	0.0573		8.26006	12.5956	0.0919976
6711	CPY-1	0.00831396	9.26e-07	0.0491817	2.66e-06	5.90239	0.075
6711	PSPT-1	0.00834652	1.1e-06	0.0495796	2.52e-06	5.73053	0.0545		8.13817	12.4732	0.0968529
6711	CPY-1	0.00831458	1.1e-06	0.049177	3.06e-06	5.74712	0.0727
6711	TC1725	0.00834875	1.13e-06	0.0495921	2.53e-06	5.65845	0.0703		8.36999	12.706	0.0999959
6711	CPY-1	0.00831403	1.23e-06	0.0491839	2.92e-06	5.96457	0.0635
6711	PSPT-1	0.00835116	1.19e-06	0.0495977	2.65e-06	5.69008	0.0712		8.36508	12.701	0.0924491
6711	CPY-1	0.00831468	1.06e-06	0.0491886	2.29e-06	6.26714	0.0672
6711	TC1725	0.00834935	1.1e-06	0.0495855	3.03e-06	5.81345	0.0702		8.0881	12.4229	0.0917777
6711	CPY-1	0.00831443	1.08e-06	0.0491868	2.47e-06	5.90571	0.0624
6711	PSPT-1	0.00835276	1.16e-06	0.0495904	2.77e-06	5.93706	0.0673		8.16488	12.5	0.0901246
6711	CPY-1	0.00831613	1.11e-06	0.0491907	2.45e-06	6.20045	0.066
6711	TC1725	0.00835029	1.17e-06	0.0495819	2.48e-06	5.62241	0.0661		7.96658	12.3008	0.0892922
6711	CPY-1	0.00831897	1.2e-06	0.0491895	2.69e-06	6.05039	0.0656
6711	PSPT-1	0.00834978	1.19e-06	0.0495826	2.83e-06	5.48177	0.0634		7.99237	12.3267	0.0978865
6711	CPY-1	0.00831498	1.11e-06	0.0491895	2.84e-06	5.8718	0.0583
6711	TC1725	0.00835214	1.15e-06	0.0495892	2.68e-06	5.77619	0.0547		8.13369	12.4687	0.0983986
6711	CPY-1	0.00831338	1.21e-06	0.0491888	2.88e-06	5.95966	0.0566
6712	CPY-1	0.00828963	1.3e-06	0.0491894	2.53e-06	6.29361	0.0618
6712	PSPT-1	0.00830996	1.43e-06	0.0495883	2.8e-06	5.79361	0.0694		8.0481	12.3827	0.0925355
6712	CPY-1	0.00827976	1.43e-06	0.0491953	2.57e-06	6.15499	0.0599
6712	TC1725	0.00831945	1.28e-06	0.0495908	2.88e-06	5.94305	0.082		8.04368	12.3783	0.0926394
6712	CPY-1	0.00829546	1.15e-06	0.0491949	2.45e-06	6.30541	0.064
6712	PSPT-1	0.00833273	1.3e-06	0.0495956	2.61e-06	5.55397	0.0517		8.22888	12.5643	0.0911467
6712	CPY-1	0.00828631	1.17e-06	0.0491867	2.72e-06	5.9487	0.0857
6712	TC1725	0.00831851	1.18e-06	0.0495897	2.78e-06	5.6701	0.0895		8.10401	12.4389	0.097519
6712	CPY-1	0.00828757	1.34e-06	0.0491954	2.83e-06	6.07928	0.0632
6712	PSPT-1	0.00831041	1.48e-06	0.0496008	2.75e-06	5.71974	0.0639		8.28774	12.6234	0.0932972
6712	CPY-1	0.0082826	1.31e-06	0.0491908	2.37e-06	5.99112	0.0714
6712	TC1725	0.00831425	1.15e-06	0.0496018	2.62e-06	6.01084	0.0736		8.33042	12.6662	0.0911313
6712	CPY-1	0.00828174	1.32e-06	0.0491932	2.78e-06	6.17283	0.0776
6712	PSPT-1	0.00832342	1.12e-06	0.0496054	2.39e-06	6.04079	0.0811		8.34251	12.6784	0.088741
6712	CPY-1	0.00829188	1.55e-06	0.0491969	2.39e-06	6.20191	0.057
6712	TC1725	0.00832534	1.25e-06	0.0496031	2.51e-06	5.91932	0.0718		8.30908	12.6448	0.0877081
6712	CPY-1	0.00827623	1.21e-06	0.0491918	2.59e-06	5.97671	0.0707
6712	PSPT-1	0.00830836	1.32e-06	0.0496008	2.7e-06	5.48099	0.069		8.27596	12.6115	0.0914285
6712	CPY-1	0.00827215	1.34e-06	0.0491955	2.52e-06	6.09836	0.0599
6712	TC1725	0.00831444	1.16e-06	0.0495949	2.73e-06	5.6704	0.0546		8.12139	12.4563	0.0945508
6712	CPY-1	0.00828598	1.42e-06	0.0491953	2.82e-06	5.84649	0.0629
6712	PSPT-1	0.00831251	1.45e-06	0.0495939	2.84e-06	5.76015	0.0666		8.0895	12.4243	0.0936478
6712	CPY-1	0.00828725	1.16e-06	0.0491965	2.31e-06	6.26286	0.0611
6712	TC1725	0.00833498	1.25e-06	0.0496008	3.05e-06	5.93968	0.0766		8.22943	12.5648	0.0912488
6712	CPY-1	0.0082903	1.09e-06	0.0491954	2.38e-06	6.24903	0.0594
6712	PSPT-1	0.0083208	1.23e-06	0.0496019	2.81e-06	5.55159	0.0713		8.27609	12.6117	0.0898377
6712	CPY-1	0.00828535	1.29e-06	0.049194	2.47e-06	5.97915	0.0607
6712	TC1725	0.00831631	1.17e-06	0.049606	2.52e-06	5.79858	0.0673		8.3539	12.6898	0.0883713
6712	CPY-1	0.00828842	1.29e-06	0.049196	2.56e-06	6.29952	0.0665
6712	PSPT-1	0.00831516	1.19e-06	0.0495872	2.36e-06	5.52562	0.0752		7.98372	12.318	0.0875211
6712	CPY-1	0.00828594	1.38e-06	0.049193	2.55e-06	6.28197	0.0608
6712	TC1725	0.00831925	1.42e-06	0.0496013	2.82e-06	5.95995	0.0523		8.29628	12.632	0.0912108
6712	CPY-1	0.00828959	1.26e-06	0.0491933	2.41e-06	6.0957	0.0703
6712	PSPT-1	0.00831791	1.27e-06	0.0496001	2.66e-06	5.85383	0.0577		8.24862	12.5841	0.0927834
6712	CPY-1	0.00827189	1.35e-06	0.0491954	2.84e-06	6.13599	0.064
6712	TC1725	0.00830959	1.48e-06	0.0495894	3.02e-06	5.61076	0.0675		8.17292	12.5081	0.104951
6712	CPY-1	0.00827622	1.24e-06	0.0491794	3.1e-06	5.89401	0.0941
6712	PSPT-1	0.00830997	1.2e-06	0.0496014	2.82e-06	5.66689	0.0697		8.34329	12.6792	0.0972016
6712	CPY-1	0.00828548	1.11e-06	0.0492026	2.33e-06	6.52914	0.0611
6712	TC1725	0.00832185	1.34e-06	0.0496143	3.12e-06	5.86381	0.0579		8.38968	12.7258	0.101342
6712	CPY-1	0.00828907	1.06e-06	0.0492004	3.14e-06	6.56591	0.0755
6712	PSPT-1	0.00832423	1.18e-06	0.0496069	2.6e-06	6.20222	0.0687		8.27146	12.607	0.0976092
6712	CPY-1	0.00827779	1.12e-06	0.0491994	2.56e-06	6.38713	0.0787
6712	TC1725	0.00831728	1.66e-06	0.0496087	2.86e-06	5.82837	0.0773		8.33519	12.671	0.0928079
6712	CPY-1	0.00828536	1.23e-06	0.0491978	2.5e-06	6.47635	0.0694
6712	PSPT-1	0.00831822	1.58e-06	0.0496121	2.32e-06	5.91983	0.0724		8.33124	12.6671	0.0883295
6712	CPY-1	0.00828525	1.27e-06	0.0492065	2.71e-06	6.09054	0.0575
6712	TC1725	0.00831175	1.36e-06	0.0496084	2.89e-06	5.72597	0.0599		8.20112	12.5364	0.0993824
6712	CPY-1	0.00829756	1.25e-06	0.0492032	2.89e-06	6.2292	0.0716
6712	PSPT-1	0.00832475	1.37e-06	0.0496159	2.75e-06	5.9925	0.0711		8.37711	12.7131	0.0926065
6712	CPY-1	0.00829606	1.09e-06	0.0492042	2.23e-06	6.32681	0.0702
6712	TC1725	0.0083257	1.18e-06	0.0496143	2.77e-06	5.87065	0.0618		8.28978	12.6254	0.0920789
6712	CPY-1	0.00829071	1.21e-06	0.0492085	2.83e-06	6.06881	0.065
6712	PSPT-1	0.00832344	1.13e-06	0.0496187	2.59e-06	6.12199	0.0646		8.35144	12.6873	0.0924757
6712	CPY-1	0.00827635	1.2e-06	0.0492069	2.47e-06	6.31281	0.0709
6712	TC1725	0.00832208	1.42e-06	0.0496171	2.93e-06	6.04965	0.0603		8.3268	12.6626	0.0971198
6712	CPY-1	0.00827903	1.04e-06	0.0492079	2.88e-06	6.32419	0.0701
6712	PSPT-1	0.00831818	1.14e-06	0.0496182	2.61e-06	5.98981	0.0573		8.36832	12.7043	0.100805
6712	CPY-1	0.00828742	1.25e-06	0.0492049	3.1e-06	6.2465	0.0694
6712	TC1725	0.00832038	1.4e-06	0.0496214	2.52e-06	6.13911	0.0636		8.46625	12.8027	0.0999901
6712	CPY-1	0.00829273	1.34e-06	0.0492047	2.89e-06	6.09026	0.0723
6712	PSPT-1	0.00831446	1.17e-06	0.0496203	2.62e-06	6.00604	0.0745		8.37821	12.7142	0.0935781
6712	CPY-1	0.00828673	1.14e-06	0.0492113	2.47e-06	6.00542	0.0767
6712	TC1725	0.0083156	1.28e-06	0.0496135	2.72e-06	5.77388	0.0712		8.20509	12.5404	0.0899186
6712	CPY-1	0.00828379	1.45e-06	0.0492081	2.49e-06	6.14787	0.0754
6712	PSPT-1	0.00831519	1.36e-06	0.0496139	2.78e-06	5.71082	0.064		8.28524	12.6209	0.091575
6712	CPY-1	0.00829538	1.28e-06	0.0492042	2.55e-06	5.83357	0.0669
6712	TC1725	0.0083254	1.5e-06	0.0496158	2.89e-06	6.29334	0.0722		8.31852	12.6543	0.0910068
6712	CPY-1	0.00829857	1.31e-06	0.0492087	2.31e-06	6.39713	0.0708
6712	PSPT-1	0.00833267	1.26e-06	0.0496153	2.73e-06	6.04403	0.0649		8.22937	12.5648	0.0894487
6712	CPY-1	0.00829887	1.04e-06	0.049212	2.59e-06	6.34914	0.0616
6712	TC1725	0.00833549	1.1e-06	0.049616	2.22e-06	5.8936	0.0702		8.26819	12.6037	0.0867238
6712	CPY-1	0.00830011	9.28e-07	0.0492062	2.58e-06	6.05427	0.0625
6712	PSPT-1	0.00833183	1.33e-06	0.049618	2.46e-06	6.11405	0.0836		8.33547	12.6713	0.0889582
6712	CPY-1	0.00830254	1.22e-06	0.0492094	2.56e-06	6.25419	0.0648
6712	TC1725	0.00833654	9.92e-07	0.0496222	2.7e-06	6.05293	0.0811		8.35175	12.6877	0.089695
6712	CPY-1	0.00830137	1.17e-06	0.049213	2.4e-06	6.14555	0.0693
6712	PSPT-1	0.00832946	1.01e-06	0.0496191	2.98e-06	6.04739	0.0614		8.21173	12.547	0.0955508
6712	CPY-1	0.00829387	1.26e-06	0.0492169	2.76e-06	6.15908	0.0604
6712	TC1725	0.00832334	1.12e-06	0.0496185	2.48e-06	5.8543	0.0629		8.19453	12.5298	0.0909116
6712	CPY-1	0.0082886	9.56e-07	0.0492135	2.52e-06	6.34331	0.0644
6712	PSPT-1	0.00832573	8.22e-07	0.0496392	1.53e-06	27.1688	0.173		8.33535	12.6712	0.0740149
6712	CPY-1	0.00828952	1.18e-06	0.0492443	2.15e-06	6.74385	0.0528
6712	TC1725	0.00832316	1.18e-06	0.0496296	2.46e-06	6.40123	0.0705		8.01124	12.3457	0.0852121
6712	CPY-1	0.00829801	1.17e-06	0.0492261	2.65e-06	6.35669	0.0752
6712	PSPT-1	0.00832795	1.29e-06	0.0496279	2.74e-06	6.13659	0.0608		8.17227	12.5074	0.0898489
6712	CPY-1	0.00829437	1.31e-06	0.0492251	2.27e-06	6.33611	0.0614
6712	TC1725	0.00833119	1.47e-06	0.0496263	3.29e-06	6.11325	0.065		8.15533	12.4904	0.0962744
6712	CPY-1	0.00830446	1.08e-06	0.0492246	2.58e-06	6.36333	0.0635
6712	PSPT-1	0.00832892	1.27e-06	0.0496253	2.14e-06	6.20106	0.0511		8.20619	12.5415	0.0842904
6712	CPY-1	0.00829787	1.17e-06	0.0492181	2.46e-06	6.36553	0.0623
6712	TC1725	0.00833323	1.21e-06	0.049631	2.94e-06	6.35848	0.0629		8.35702	12.693	0.0907128
6712	CPY-1	0.00830425	1.05e-06	0.0492213	2.32e-06	6.40041	0.0521
6712	PSPT-1	0.00833788	1.09e-06	0.0496303	2.56e-06	6.36892	0.0683		8.347	12.6829	0.086028
6712	CPY-1	0.0082987	1.19e-06	0.0492176	2.47e-06	6.43634	0.0655
6712	TC1725	0.00832816	1.3e-06	0.0496311	2.54e-06	6.19681	0.0598		8.32474	12.6605	0.0874957	12.5925	0.299326	n=104
6712	CPY-1	0.00830151	1.1e-06	0.0492251	2.47e-06	6.33491	0.068
6713	CPY-1	0.00816103	2.21e-06	0.0490817	2.57e-06	5.78183	0.0604		mount 4
6713	TC1725	0.00823577	1.81e-06	0.0494829	3.06e-06	5.21286	0.0623		8.07267	12.4074	0.0970268
6713	CPY-1	0.00820867	1.88e-06	0.0490916	2.62e-06	5.64687	0.0632
6713	TC1725	0.00822344	2.06e-06	0.0494912	2.98e-06	5.10271	0.0793		8.18835	12.5236	0.0945767
6713	CPY-1	0.00819238	1.81e-06	0.0490869	2.44e-06	5.58985	0.0621
6713	TC1725	0.00820066	2.3e-06	0.0494875	2.65e-06	4.93317	0.0651		8.11113	12.446	0.0883669
6713	CPY-1	0.00815257	2.51e-06	0.0490917	2.44e-06	5.42756	0.0583
6713	TC1725	0.00820021	2.5e-06	0.0494963	2.68e-06	5.24743	0.0614		8.20075	12.536	0.0899989
6713	CPY-1	0.00818786	1.85e-06	0.0490957	2.55e-06	5.53449	0.0457
6713	TC1725	0.00819612	2.45e-06	0.0494948	3.17e-06	5.0491	0.0662		8.14894	12.484	0.0956552
6713	CPY-1	0.00818358	1.41e-06	0.0490938	2.38e-06	5.76904	0.0617
6713	TC1725	0.00823465	2.22e-06	0.0495035	2.85e-06	5.32585	0.0618		8.30417	12.6399	0.0996954
6713	CPY-1	0.00821786	1.58e-06	0.0490978	3.21e-06	5.82334	0.0736
6713	TC1725	0.00823938	2.13e-06	0.0494912	2.86e-06	5.24257	0.0803		8.00292	12.3373	0.104129
6713	CPY-1	0.00817105	1.9e-06	0.0490988	2.79e-06	5.39886	0.0534
6713	TC1725	0.00820291	1.96e-06	0.0494971	2.39e-06	5.21004	0.0572		8.15317	12.4882	0.0898399
6713	CPY-1	0.00819325	2.02e-06	0.0490949	2.46e-06	5.66592	0.0551
6713	TC1725	0.00825786	1.71e-06	0.0494979	2.92e-06	5.45635	0.0619		8.18446	12.5197	0.0945949
6713	CPY-1	0.00822057	1.85e-06	0.0490973	2.67e-06	5.74836	0.0636
6713	TC1725	0.00826187	1.65e-06	0.0495083	2.8e-06	5.69658	0.0518		8.38571	12.7218	0.100839
6713	CPY-1	0.00822605	1.84e-06	0.049096	3.11e-06	5.80007	0.0677
6713	TC1725	0.00827092	1.48e-06	0.0495045	2.58e-06	5.38965	0.0786		8.32742	12.6632	0.0959102
6713	CPY-1	0.00822612	2.07e-06	0.0490953	2.44e-06	5.68815	0.0706
6713	TC1725	0.00824782	1.57e-06	0.0494983	2.58e-06	5.17957	0.0642		8.13234	12.4673	0.0890293
6713	CPY-1	0.00823304	2.06e-06	0.0491028	2.57e-06	5.65447	0.0571
6713	TC1725	0.00824724	1.96e-06	0.0494991	3.17e-06	5.53548	0.069		8.04434	12.3789	0.0985353
6713	CPY-1	0.00823987	1.51e-06	0.0491054	2.63e-06	5.52271	0.0597
6713	TC1725	0.00828653	1.38e-06	0.0494961	2.67e-06	5.27453	0.0713		8.01701	12.3515	0.0970194
6713	CPY-1	0.00825369	1.6e-06	0.0490995	2.96e-06	5.81379	0.062
6713	TC1725	0.00829081	1.4e-06	0.049508	2.71e-06	5.62101	0.0643		8.25701	12.5925	0.0985974
6713	CPY-1	0.00825639	1.54e-06	0.0491055	2.73e-06	5.81793	0.0607
6713	TC1725	0.00826736	1.62e-06	0.0495105	3.05e-06	5.55655	0.0559		8.29109	12.6267	0.0970372
6713	CPY-1	0.00822585	1.62e-06	0.0491012	2.47e-06	5.58299	0.0597
6713	TC1725	0.00825522	1.95e-06	0.0495012	3.11e-06	5.42314	0.0585		8.1677	12.5028	0.0979387
6713	CPY-1	0.00823359	1.51e-06	0.0490991	2.74e-06	5.72393	0.0661
6713	TC1725	0.00829765	1.19e-06	0.0495267	1.89e-06	9.12278	0.0807		8.60488	12.9419	0.0847516
6713	CPY-1	0.0082624	1.64e-06	0.0491091	2.51e-06	5.95831	0.0598
6713	TC1725	0.0082943	1.35e-06	0.0495053	2.98e-06	5.57882	0.0595		8.13334	12.4683	0.0917105
6713	CPY-1	0.0082575	1.55e-06	0.0491026	2.29e-06	5.90664	0.0638
6713	TC1725	0.00827761	1.81e-06	0.0495078	2.84e-06	5.94927	0.0633		8.23343	12.5688	0.0929939
6713	CPY-1	0.00824923	1.63e-06	0.0491044	2.77e-06	5.80053	0.0618
6713	TC1725	0.00827604	1.42e-06	0.0495145	3e-06	5.67295	0.0525		8.35109	12.687	0.103494
6713	CPY-1	0.00824854	1.62e-06	0.0491044	3.05e-06	5.58347	0.0566
6713	TC1725	0.0082938	1.45e-06	0.0495078	3.04e-06	5.74968	0.0566		8.25971	12.5952	0.103977
6713	CPY-1	0.00824175	1.7e-06	0.0491	2.77e-06	5.48102	0.0618
6713	TC1725	0.00828675	1.77e-06	0.0495215	3.17e-06	5.72491	0.0567		8.64758	12.9848	0.0997852
6713	CPY-1	0.00826483	1.23e-06	0.0490939	2.54e-06	5.59345	0.0706
6713	TC1725	0.00831007	1.39e-06	0.0495154	2.44e-06	6.17778	0.063		8.41541	12.7516	0.0886846
6713	CPY-1	0.00826688	1.53e-06	0.0491105	2.58e-06	5.7893	0.0707
6713	TC1725	0.00829065	1.67e-06	0.0495128	2.26e-06	5.73814	0.0541		8.22119	12.5565	0.0855109
6713	CPY-1	0.0082564	1.22e-06	0.0491076	2.44e-06	5.78664	0.0542
6713	TC1725	0.008279	1.59e-06	0.0495053	2.41e-06	5.73266	0.0595		8.13714	12.4721	0.0870515
6713	CPY-1	0.00825838	1.19e-06	0.0491038	2.57e-06	5.87902	0.0758
6713	TC1725	0.00830828	1.4e-06	0.0495099	2.44e-06	5.48008	0.0611		8.23851	12.5739	0.0929062
6713	CPY-1	0.00827346	1.35e-06	0.0491069	2.89e-06	5.90818	0.0474
6713	TC1725	0.00831466	1.18e-06	0.0495071	2.94e-06	5.69971	0.0733		8.16917	12.5043	0.0970506
6713	CPY-1	0.00827552	1.18e-06	0.049105	2.42e-06	5.79718	0.063
6714	Sample1	0.00828613	1.09e-06	0.0491041	2.44e-06	6.09761	0.0621
6714	Sample2	0.00832135	9.77e-07	0.0495197	2.59e-06	6.2797	0.0729		8.40759	12.7437	0.0862347
6714	Sample3	0.00827435	1.25e-06	0.0491094	2.32e-06	6.13546	0.0653
6714	Sample4	0.00830488	1.32e-06	0.0495006	2.41e-06	5.93443	0.0733		7.9625	12.2967	0.0888789
6714	Sample5	0.00827549	1.29e-06	0.0491097	2.82e-06	6.09874	0.0688
6714	Sample6	0.00831108	1.38e-06	0.0495101	2.57e-06	6.02556	0.0558		8.18726	12.5225	0.0905797
6714	Sample7	0.00827691	1.28e-06	0.0491064	2.31e-06	6.09672	0.0772
6714	Sample8	0.00830084	1.35e-06	0.0495075	2.69e-06	6.10664	0.0684		8.02295	12.3574	0.0874807
6714	Sample9	0.00827136	1.2e-06	0.0491206	2.45e-06	6.50638	0.0645
6714	Sample10	0.00830663	1.21e-06	0.049516	3.17e-06	5.8136	0.077		8.07729	12.412	0.0913522
6714	Sample11	0.00827573	1.2e-06	0.0491178	2.06e-06	6.39813	0.0616
6714	Sample12	0.00830556	1.13e-06	0.0495194	2.68e-06	5.90442	0.0621		8.15872	12.4938	0.0799747
6714	Sample13	0.00827058	1.4e-06	0.0491195	2.03e-06	6.13723	0.0632
6714	Sample14	0.00830118	1.4e-06	0.049503	2.7e-06	5.80551	0.0817		7.85088	12.1846	0.0833827
6714	Sample15	0.00826364	2.63e-06	0.0491154	2.34e-06	6.09522	0.0751
6714	Sample16	0.00827132	1.99e-06	0.0495211	2.2e-06	5.83831	0.0488		8.2701	12.6057	0.0861644
6714	Sample17	0.00824631	1.5e-06	0.0491144	2.77e-06	6.14024	0.0673
6714	Sample18	0.00829532	1.23e-06	0.0495287	2.76e-06	5.71953	0.0718		8.34364	12.6795	0.0968229
6714	Sample19	0.00826481	1.46e-06	0.0491233	2.73e-06	6.17059	0.0563
6714	Sample20	0.00828939	1.51e-06	0.0495203	2.95e-06	5.71213	0.0579		8.10993	12.4448	0.0943751
6714	Sample21	0.00825006	1.46e-06	0.0491205	2.34e-06	5.92003	0.0644
6714	Sample22	0.00828304	1.58e-06	0.0495414	2.12e-06	5.8575	0.0608		8.53504	12.8717	0.0842566
6714	Sample23	0.00824979	1.33e-06	0.0491238	2.69e-06	5.79193	0.0525
6714	Sample24	0.00825962	1.96e-06	0.0495206	2.59e-06	5.78813	0.0569		8.0518	12.3864	0.0879746
6714	Sample25	0.00824551	1.5e-06	0.0491263	2.2e-06	5.99331	0.0495
6714	Sample26	0.0082956	1.48e-06	0.049534	2.32e-06	5.87716	0.0528		8.33258	12.6684	0.0844472
6714	Sample27	0.00825607	1.25e-06	0.049123	2.66e-06	6.09374	0.0702
6714	Sample28	0.00828908	1.49e-06	0.0495303	2.53e-06	5.64435	0.0608		8.23149	12.5669	0.0931374
6714	Sample29	0.00824497	1.4e-06	0.0491289	2.75e-06	5.89214	0.0689
6714	Sample30	0.00827139	1.41e-06	0.0495417	2.31e-06	5.58855	0.0716		8.42497	12.7612	0.0872645
6714	Sample31	0.00822264	1.54e-06	0.0491266	2.36e-06	5.65589	0.0597
6714	Sample32	0.00825556	1.6e-06	0.049523	2.45e-06	5.8437	0.0553		8.05048	12.3851	0.0880527
6714	Sample33	0.00823052	1.47e-06	0.0491285	2.69e-06	5.84128	0.0609
6714	Sample34	0.00828465	1.47e-06	0.049534	2.66e-06	5.85473	0.0606		8.243	12.5784	0.0961611
6714	Sample35	0.00823037	1.69e-06	0.0491295	2.85e-06	5.9933	0.0662
6714	Sample36	0.00826061	1.6e-06	0.0495351	2.39e-06	5.94904	0.0585		8.21223	12.5475	0.0912338
6714	Sample37	0.00824107	1.55e-06	0.0491337	2.52e-06	5.84934	0.0634
6714	Sample38	0.00826781	1.73e-06	0.0495359	2.12e-06	5.70634	0.0575		8.17885	12.514	0.0812192
6714	Sample39	0.00820549	1.88e-06	0.0491344	2.27e-06	5.61504	0.0537
6714	Sample40	0.00824559	1.82e-06	0.0495466	2.94e-06	5.83618	0.0817		8.43162	12.7679	0.0916066
6714	Sample41	0.00824198	1.68e-06	0.0491302	2.57e-06	5.80761	0.0674
6714	Sample42	0.00826169	1.78e-06	0.0495354	2.35e-06	5.75057	0.0703		8.23782	12.5732	0.0897325
6714	Sample43	0.00824537	1.64e-06	0.0491312	2.72e-06	5.80854	0.0623
6714	Sample44	0.00828971	1.27e-06	0.049537	2.54e-06	5.75786	0.0615		8.22998	12.5654	0.0903338
6714	Sample45	0.00825511	1.34e-06	0.049134	2.44e-06	5.83302	0.0516
6714	Sample46	0.00828897	1.36e-06	0.0495414	2.79e-06	5.81383	0.0692		8.2556	12.5911	0.0929227
6714	Sample47	0.00825343	1.39e-06	0.0491374	2.69e-06	5.82062	0.0679
6714	Sample48	0.00828316	1.47e-06	0.0495387	2.89e-06	5.50766	0.071		8.15008	12.4851	0.0953586
6714	Sample49	0.00825532	1.32e-06	0.049139	2.55e-06	5.7106	0.0665
6714	Sample50	0.00827057	1.43e-06	0.049528	2.97e-06	5.32853	0.0856		7.95191	12.2861	0.089798
6714	Sample51	0.00824881	1.8e-06	0.0491356	2.07e-06	5.56672	0.0658
6714	Sample52	0.00827824	1.46e-06	0.0495413	3.17e-06	5.36202	0.056		8.16472	12.4998	0.0916253
6714	Sample53	0.00825096	1.49e-06	0.0491445	2.47e-06	5.83198	0.0588
6714	Sample54	0.00828875	1.4e-06	0.0495554	2.58e-06	5.47805	0.0703		8.39235	12.7284	0.0875313
6714	Sample55	0.00827038	1.09e-06	0.0491415	2.42e-06	5.85713	0.0582
6714	Sample56	0.00830611	1.25e-06	0.0495428	3.09e-06	5.67916	0.0689		8.20775	12.543	0.0952472
6714	Sample57	0.00826607	1.25e-06	0.0491376	2.58e-06	5.92232	0.0632
6714	Sample58	0.00829945	1.17e-06	0.0495427	2.64e-06	5.9369	0.0766		8.31652	12.6523	0.0912834
6714	Sample59	0.00826826	1.47e-06	0.0491306	2.57e-06	5.3804	0.0749
6714	Sample60	0.00830307	1.13e-06	0.0495642	2.73e-06	5.74615	0.0692		8.7074	13.0448	0.0909724
6714	Sample61	0.0082669	1.36e-06	0.0491421	2.46e-06	5.59228	0.0556
6714	Sample62	0.00830061	1.25e-06	0.049564	2.36e-06	5.69721	0.0563		8.54148	12.8782	0.083446
6714	Sample63	0.00826485	1.17e-06	0.0491464	2.3e-06	5.77638	0.0692
6714	Sample64	0.00830681	1.26e-06	0.0495563	2.57e-06	5.71581	0.066		8.32623	12.662	0.0848821
6714	Sample65	0.00827607	1.1e-06	0.0491478	2.37e-06	5.81719	0.0658
6714	Sample66	0.00830679	1.21e-06	0.0495441	2.6e-06	5.56195	0.0771		8.05533	12.39	0.0904838
6714	Sample67	0.00827248	1.24e-06	0.0491486	2.74e-06	5.74378	0.0652
6714	Sample68	0.00830896	1.12e-06	0.0495686	2.78e-06	5.80098	0.0692		8.45974	12.7961	0.0984171
6714	Sample69	0.00827223	1.42e-06	0.0491569	2.88e-06	5.64222	0.0591
6714	Sample70	0.00830596	1.34e-06	0.049555	2.54e-06	5.53296	0.0678		8.15004	12.4851	0.0976773
6714	Sample71	0.00826888	1.17e-06	0.0491517	2.9e-06	5.53578	0.069
6714	Sample72	0.00830527	1.22e-06	0.0495568	2.62e-06	5.59591	0.0638		8.17578	12.5109	0.0953686
6714	Sample73	0.00827444	1.27e-06	0.0491582	2.61e-06	5.76121	0.0716
6714	Sample74	0.00830753	1.25e-06	0.0495618	2.54e-06	5.63811	0.0662		8.24222	12.5777	0.0921137
6714	Sample75	0.00827681	9.99e-07	0.0491551	2.71e-06	5.77613	0.0666
6714	Sample76	0.00831074	1.17e-06	0.04956	2.52e-06	5.55025	0.0605		8.17864	12.5138	0.0886118
6714	Sample77	0.00828018	1.12e-06	0.0491607	2.32e-06	5.83387	0.0666
6714	Sample78	0.00831031	1.32e-06	0.0495581	3.01e-06	5.56791	0.07		8.10277	12.4376	0.0933456
6714	Sample79	0.00827404	1.17e-06	0.0491587	2.6e-06	5.50242	0.0559
6714	Sample80	0.00831041	1.27e-06	0.0495618	2.27e-06	5.55972	0.0582		8.20131	12.5366	0.0878296
6714	Sample81	0.00827536	1.14e-06	0.0491584	2.61e-06	5.64764	0.073
6714	Sample82	0.00831329	1.29e-06	0.0495697	2.6e-06	5.25496	0.0509		8.35739	12.6933	0.093638
6714	Sample83	0.00827637	1.3e-06	0.0491593	2.78e-06	5.61989	0.0568
6714	Sample84	0.00831163	1.23e-06	0.0495706	2.35e-06	5.57882	0.0714		8.36073	12.6967	0.0951127
6714	Sample85	0.00827846	1.22e-06	0.0491599	2.95e-06	5.7089	0.0686
6714	Sample86	0.00831306	1.09e-06	0.0495696	2.89e-06	5.51827	0.0747		8.24707	12.5825	0.100639
6714	Sample87	0.00827718	1.07e-06	0.0491683	2.75e-06	5.69083	0.0571
6714	Sample88	0.00830951	1.25e-06	0.0495732	3.01e-06	5.13791	0.0608		8.30779	12.6435	0.0979312
6714	Sample89	0.00827502	1.08e-06	0.0491611	2.59e-06	5.47462	0.0633
6714	Sample90	0.00831019	1.32e-06	0.0495661	2.88e-06	4.97638	0.0766		8.09007	12.4249	0.0932472
6714	Sample91	0.00828005	1.26e-06	0.0491755	2.48e-06	5.84248	0.0535
6714	Sample92	0.00831591	1.08e-06	0.0495764	2.05e-06	5.48033	0.0653		8.2893	12.6249	0.0872576
6714	Sample93	0.00828039	1.2e-06	0.049162	2.85e-06	5.71594	0.0734
6714	Sample94	0.00831032	1.15e-06	0.0495713	3.3e-06	5.20202	0.0771		8.24166	12.5771	0.102692
6714	Sample95	0.00827685	1.23e-06	0.0491701	2.58e-06	5.77609	0.0643
6714	Sample96	0.00831605	1.07e-06	0.0495807	2.64e-06	5.66944	0.0707		8.33092	12.6667	0.0892785
6714	Sample97	0.00827863	1.18e-06	0.0491719	2.4e-06	5.64598	0.056
6714	Sample98	0.00830774	1.15e-06	0.0495751	3.03e-06	5.33876	0.0617		8.13714	12.4721	0.0935074
6714	Sample99	0.0082772	1.14e-06	0.0491779	2.52e-06	5.58456	0.057
6714	Sample2	0.00830945	1.36e-06	0.0495637	2.83e-06	5.60028	0.0741		7.97022	12.3045	0.0884089
6714	Sample3	0.0082782	1.27e-06	0.0491657	2.16e-06	5.57422	0.0681
6714	Sample4	0.00831	1.35e-06	0.0495601	3.26e-06	5.75132	0.0627		7.95892	12.2931	0.100772
6714	Sample5	0.00827491	1.21e-06	0.0491718	3.07e-06	5.68665	0.0617
6714	Sample6	0.00830965	1.18e-06	0.0495654	2.62e-06	5.59743	0.0727		8.11538	12.4503	0.094748
6714	Sample7	0.00827719	9.45e-07	0.049161	2.35e-06	5.75823	0.0636
6714	Sample8	0.00830843	1.24e-06	0.0495586	2.89e-06	5.3903	0.072		7.90914	12.2431	0.0932733
6714	Sample9	0.00827657	1.18e-06	0.0491784	2.7e-06	5.60239	0.0589
6714	Sample10	0.0083073	1.32e-06	0.0495626	2.88e-06	5.25615	0.071		7.91761	12.2517	0.0921136
6714	Sample11	0.00827647	1.17e-06	0.0491681	2.25e-06	5.59097	0.0545
6714	Sample12	0.00830971	1.25e-06	0.0495586	2.87e-06	5.39608	0.0866		7.96622	12.3005	0.0855843
6714	Sample13	0.00828199	1.09e-06	0.0491658	2.13e-06	6.49191	0.107
6714	Sample14	0.00831259	1.22e-06	0.0495651	3.39e-06	5.46307	0.0763		8.01088	12.3453	0.098281
6714	Sample15	0.00827746	1.2e-06	0.0491767	2.74e-06	5.86297	0.063
6714	Sample16	0.00831023	1.23e-06	0.0495838	3.24e-06	5.48447	0.0727		8.23916	12.5746	0.100103
6714	Sample17	0.0082757	1e-06	0.0491805	2.53e-06	5.54933	0.0617
6714	Sample18	0.00831024	1.31e-06	0.0495798	2.9e-06	5.4053	0.0701		8.16992	12.505	0.09403
6714	Sample19	0.00827933	1.34e-06	0.0491755	2.59e-06	5.49474	0.0624
6714	Sample20	0.00830946	1.05e-06	0.0495836	3.41e-06	5.32357	0.0633		8.3457	12.6816	0.106779
6714	Sample21	0.00827253	1.3e-06	0.0491709	3.07e-06	5.30648	0.0769
6714	Sample22	0.00830964	1.12e-06	0.0495901	2.45e-06	5.34937	0.0597		8.43502	12.7713	0.0969429
6714	Sample23	0.00827671	1.31e-06	0.0491797	2.72e-06	5.48227	0.0586
6714	Sample24	0.00831456	1.2e-06	0.0495851	2.81e-06	5.39551	0.0631		8.16349	12.4986	0.0994575
6714	Sample25	0.00827703	1.16e-06	0.0491875	2.96e-06	5.50208	0.0501
6714	Sample26	0.00830942	1.02e-06	0.0495915	2.66e-06	5.59783	0.0641		8.23417	12.5696	0.0978732
6714	Sample27	0.00827341	1.22e-06	0.0491855	2.73e-06	5.84196	0.0742
6714	Sample28	0.0083132	1.41e-06	0.0495965	2.25e-06	5.25536	0.0642		8.35581	12.6917	0.0941222
6714	Sample29	0.00827338	1.41e-06	0.0491856	3e-06	5.17869	0.0638
6714	Sample30	0.00831072	1.34e-06	0.0496004	3.01e-06	5.19941	0.0513		8.4834	12.8199	0.104192
6714	Sample31	0.00827717	1.22e-06	0.0491806	2.89e-06	5.15672	0.0788
6714	Sample32	0.00830915	1.33e-06	0.0496035	2.96e-06	5.53561	0.0595		8.61697	12.954	0.106056
6714	Sample33	0.00827278	1.13e-06	0.0491788	3.2e-06	5.40381	0.0679
6714	Sample34	0.00830709	1.14e-06	0.0496035	2.6e-06	5.54634	0.0668		8.53257	12.8693	0.106019
6714	Sample35	0.00827364	1.46e-06	0.0491889	3.21e-06	5.1988	0.0683
6714	Sample36	0.00831224	1.12e-06	0.0496021	2.82e-06	5.66198	0.075		8.49141	12.8279	0.100271
6714	Sample37	0.00827297	1.23e-06	0.0491799	2.49e-06	5.21074	0.0796
6714	Sample38	0.00830551	1.16e-06	0.0496009	2.54e-06	5.38112	0.0775		8.50667	12.8433	0.0965062
6714	Sample39	0.00827277	1.53e-06	0.0491852	3.16e-06	5.1758	0.0586
6714	Sample40	0.0083078	1.14e-06	0.0496019	2.75e-06	5.3321	0.0633		8.48252	12.819	0.103918
6714	Sample41	0.0082758	1.15e-06	0.0491841	2.95e-06	5.31036	0.0705
6714	Sample42	0.00831297	1.33e-06	0.0496012	2.96e-06	5.70591	0.0654		8.47167	12.8081	0.0993363
6714	Sample43	0.00827242	1.28e-06	0.049185	2.56e-06	5.11062	0.0526
6714	Sample44	0.00831249	1.05e-06	0.0496073	2.54e-06	5.53329	0.0614		8.58102	12.9179	0.0979283
6714	Sample45	0.00827529	1.2e-06	0.0491856	3.21e-06	5.24308	0.0723
6714	Sample46	0.0083076	1.33e-06	0.049604	3.11e-06	5.42603	0.0542		8.45621	12.7926	0.113139
6714	Sample47	0.00827432	1.15e-06	0.0491906	3.34e-06	5.26648	0.0584
6714	Sample48	0.00830862	1.29e-06	0.0495934	2.84e-06	5.24259	0.056		8.18405	12.5192	0.105388
6714	Sample49	0.0082759	1.46e-06	0.049191	2.79e-06	5.36638	0.0559
6714	Sample50	0.00831104	1.3e-06	0.0495902	2.45e-06	5.13597	0.0773		8.20692	12.5422	0.0969707
6714	Sample51	0.00827365	1.27e-06	0.0491822	3.01e-06	5.30359	0.07
6714	Sample52	0.00830911	1.41e-06	0.0495978	2.81e-06	5.46242	0.0702		8.27033	12.6059	0.101082
6714	Sample53	0.00827263	1.22e-06	0.0491997	2.81e-06	5.54431	0.0693
6714	Sample54	0.00831061	1.27e-06	0.0496051	2.99e-06	5.3644	0.0628		8.34155	12.6774	0.0995394
6714	Sample55	0.00827188	1.26e-06	0.0491897	2.7e-06	5.44488	0.061
6714	Sample56	0.00831185	1.2e-06	0.0496058	2.66e-06	5.41991	0.0746		8.46103	12.7974	0.094702
6714	Sample57	0.0082782	1.26e-06	0.0491895	2.73e-06	5.32274	0.0864
6714	Sample58	0.00831438	1.12e-06	0.0496094	2.71e-06	5.47727	0.0636		8.39524	12.7313	0.098778
6714	Sample59	0.00827473	1.19e-06	0.0492032	2.99e-06	5.72108	0.0729
6714	Sample60	0.00830693	1.19e-06	0.0496103	2.36e-06	5.6181	0.0759		8.24209	12.5775	0.0909704
6714	Sample61	0.00827094	1.09e-06	0.0492063	2.37e-06	5.68399	0.0608
6714	Sample62	0.00830483	1.21e-06	0.0496179	2.58e-06	5.59342	0.0659		8.48529	12.8218	0.0889012
6714	Sample63	0.00826983	1.51e-06	0.0491946	2.64e-06	5.14516	0.0683
6714	Sample64	0.00831154	1.32e-06	0.0496182	2.74e-06	5.38471	0.0576		8.5817	12.9186	0.0946762
6714	Sample65	0.00827757	1.23e-06	0.0491974	2.71e-06	5.30515	0.0555
6714	Sample66	0.00831087	1.23e-06	0.0496053	2.59e-06	5.22703	0.0713		8.22868	12.5641	0.0991611
6714	Sample67	0.00827676	1.14e-06	0.0492036	3.14e-06	5.55658	0.0639
6714	Sample68	0.00830832	1.16e-06	0.0496126	3.45e-06	5.14134	0.0735		8.23966	12.5751	0.107283
6714	Sample69	0.00826593	1.38e-06	0.0492106	2.51e-06	5.48246	0.052
6714	Sample70	0.00830654	1.45e-06	0.0496185	3.39e-06	4.9723	0.0735		8.39531	12.7314	0.105176
6714	Sample71	0.00826855	1.35e-06	0.0492002	3.03e-06	5.16692	0.0668
6714	Sample72	0.00830349	1.26e-06	0.0496214	2.67e-06	4.96152	0.0627		8.50345	12.84	0.0987098
6714	Sample73	0.00826931	1.27e-06	0.0492057	2.72e-06	5.39671	0.0628
6714	Sample74	0.00830142	1.47e-06	0.0496012	2.88e-06	5.32921	0.0616		8.05724	12.3919	0.0934211
6714	Sample75	0.00827674	1.17e-06	0.0492039	2.36e-06	5.38916	0.0596
6714	Sample76	0.00830387	1.4e-06	0.0496002	2.49e-06	5.61522	0.0672		8.07472	12.4094	0.0879971
6714	Sample77	0.00827481	1.3e-06	0.049202	2.66e-06	5.49153	0.0601
6714	Sample78	0.00830098	1.5e-06	0.0496017	2.93e-06	5.39547	0.0569		8.08339	12.4182	0.0960501
6714	Sample79	0.00825916	1.32e-06	0.0492059	2.61e-06	5.50378	0.0658
6714	Sample80	0.00830355	1.21e-06	0.0496194	2.5e-06	5.59513	0.0787		8.43308	12.7693	0.0948451
6714	Sample81	0.00826901	1.27e-06	0.049203	2.97e-06	5.33778	0.0692
6714	Sample82	0.00830425	1.15e-06	0.0496077	2.93e-06	5.11619	0.0635		8.15893	12.494	0.102981
6714	Sample83	0.00827438	1.17e-06	0.0492094	2.9e-06	5.50793	0.0605
6714	Sample84	0.00830641	1.32e-06	0.0496096	2.85e-06	5.32938	0.0772		8.15893	12.494	0.100404
6714	Sample85	0.00827308	1.63e-06	0.0492067	2.83e-06	5.242	0.0662
6714	Sample86	0.00830374	1.47e-06	0.0496259	2.55e-06	5.18095	0.0675		8.45286	12.7892	0.094178
6714	Sample87	0.00827236	1.34e-06	0.0492132	2.66e-06	5.50275	0.0618
6714	Sample88	0.00830168	1.12e-06	0.0496334	2.37e-06	5.4195	0.0578		8.60353	12.9405	0.0908684
6714	Sample89	0.00826509	1.21e-06	0.0492069	2.72e-06	5.4784	0.0588
6714	Sample90	0.00829981	1.09e-06	0.0496299	2.48e-06	5.41145	0.0633		8.50167	12.8382	0.0888314
6714	Sample91	0.00826351	1.27e-06	0.0492162	2.38e-06	5.52333	0.0729
6714	Sample92	0.00829816	1.73e-06	0.0496329	2.42e-06	5.30799	0.0676		8.5281	12.8648	0.0813921
6714	Sample93	0.00826272	1.18e-06	0.0492102	2.15e-06	5.29767	0.0611
6714	Sample94	0.00828789	1.25e-06	0.0496069	3.3e-06	4.98887	0.0762		8.08499	12.4198	0.0944206	12.5934	0.360905	n=124
6714	Sample95	0.00826156	1.34e-06	0.049208	2.5e-06	5.40543	0.0623
6715	Sample1	0.00828379	1.03e-06	0.0488658	2.55e-06	7.02095	0.08		mount5
6715	Sample2	0.00832318	1.17e-06	0.0492761	2.84e-06	6.49049	0.0841		8.40978	12.7459	0.0973168
6715	Sample3	0.0082868	9.76e-07	0.0488644	2.86e-06	6.36289	0.0853
6715	Sample4	0.00832232	9.1e-07	0.0492813	2.54e-06	6.52471	0.0716		8.39939	12.7355	0.0972538
6715	Sample5	0.00828539	9.87e-07	0.0488772	2.84e-06	5.9001	0.0835
6715	Sample6	0.00832344	1.2e-06	0.0492687	2.7e-06	5.79793	0.0754		8.33356	12.6694	0.0973666
6715	Sample7	0.00828377	1.05e-06	0.0488457	2.72e-06	5.89051	0.112
6715	Sample8	0.00832312	1.11e-06	0.0492666	2.99e-06	6.35072	0.0899		8.41265	12.7488	0.095585
6715	Sample9	0.00828721	1.06e-06	0.0488654	2.37e-06	6.61918	0.0736
6715	Sample10	0.00832052	1.23e-06	0.0492657	2.47e-06	6.33642	0.0777		8.27153	12.6071	0.0847316
6715	Sample11	0.00828601	9.87e-07	0.0488577	2.35e-06	6.8677	0.0824
6715	Sample12	0.00832232	1.07e-06	0.04926	2.68e-06	6.22604	0.0766		8.19656	12.5318	0.0877851
6715	Sample13	0.00828586	1.06e-06	0.0488613	2.41e-06	6.79439	0.0882
6715	Sample14	0.00832714	4.85e-07	0.0492749	1.5e-06	28.3018	0.101		8.17024	12.5054	0.0779739
6715	Sample15	0.00828691	1.03e-06	0.0488899	2.55e-06	6.60501	0.0838
6715	Sample16	0.00832058	1.16e-06	0.0492726	2.65e-06	6.39304	0.0668		7.99077	12.3251	0.0917676
6715	Sample17	0.00828734	1.04e-06	0.0488741	2.59e-06	6.65961	0.0695
6715	Sample18	0.00832051	1.21e-06	0.0492806	2.85e-06	6.47008	0.0869		8.32791	12.6637	0.0922193
6715	Sample19	0.00828651	1.06e-06	0.0488731	2.37e-06	6.79677	0.0737
6715	Sample20	0.00832115	9.93e-07	0.0492662	3.01e-06	6.30208	0.0769		8.05906	12.3937	0.0908893
6715	Sample21	0.00828727	9.88e-07	0.0488716	2.28e-06	6.70039	0.0693
6715	Sample22	0.00831983	1.13e-06	0.0492672	2.99e-06	5.65689	0.0766		8.19081	12.526	0.0912849
6715	Sample23	0.00828451	1.15e-06	0.0488623	2.43e-06	6.67373	0.0833
6715	Sample24	0.00831914	1.2e-06	0.0492626	2.9e-06	4.97933	0.0728		8.11164	12.4465	0.0950605
6715	Sample25	0.00828249	1.02e-06	0.04887	2.72e-06	6.3368	0.0747
6715	Sample26	0.00831869	1.16e-06	0.0492684	2.38e-06	6.14045	0.066		8.25487	12.5904	0.0943701
6715	Sample27	0.0082867	9.86e-07	0.0488601	2.88e-06	6.59393	0.0843
6715	Sample28	0.00832195	1.17e-06	0.0492657	2.88e-06	6.1853	0.0762		8.29939	12.6351	0.097518
6715	Sample29	0.00828586	9.87e-07	0.0488603	2.5e-06	6.62132	0.0777
6715	Sample30	0.0083194	1.16e-06	0.0492789	2.79e-06	6.13721	0.0714		8.46667	12.8031	0.0905272
6715	Sample31	0.00828275	1.01e-06	0.04887	2.38e-06	6.51199	0.0779
6715	Sample32	0.00831537	1.2e-06	0.0492679	2.73e-06	6.24894	0.0716		8.16388	12.499	0.0869602
6715	Sample33	0.00828273	9.31e-07	0.0488679	2.25e-06	6.30415	0.0646
6715	Sample34	0.00831581	1.02e-06	0.0492681	2.74e-06	5.97109	0.0888		8.18829	12.5235	0.0853029
6715	Sample35	0.00828072	9.47e-07	0.0488681	2.22e-06	6.47536	0.0715
6715	Sample36	0.00831716	1.08e-06	0.049276	2.55e-06	6.15878	0.0757		8.31074	12.6465	0.0872682
6715	Sample37	0.00828619	1.06e-06	0.0488717	2.62e-06	6.45762	0.0707
6715	Sample38	0.00831832	9.87e-07	0.0492734	2.65e-06	6.16065	0.068		8.1808	12.516	0.0913298
6715	Sample39	0.00828197	1.01e-06	0.0488755	2.48e-06	6.61256	0.0776
6715	Sample40	0.00831699	1.2e-06	0.0492726	2.54e-06	6.4398	0.0777		8.11812	12.453	0.0911391
6715	Sample41	0.00828413	9.76e-07	0.0488762	2.71e-06	6.57286	0.0729
6715	Sample42	0.00831749	8.82e-07	0.0492762	2.21e-06	6.52593	0.0802		8.21138	12.5467	0.0871705
6715	Sample43	0.00827912	9.45e-07	0.0488735	2.45e-06	6.46157	0.0706
6715	Sample44	0.00831215	1.2e-06	0.0492753	3.25e-06	6.08095	0.0833		8.21937	12.5547	0.096409
6715	Sample45	0.00827813	1.08e-06	0.0488737	2.41e-06	6.48625	0.0655
6715	Sample46	0.0083188	1.13e-06	0.0492778	2.13e-06	6.07005	0.075		8.26071	12.5962	0.0831646
6715	Sample47	0.00828211	8.46e-07	0.0488745	2.5e-06	6.43048	0.0686
6715	Sample48	0.00831556	9.96e-07	0.0492744	2.42e-06	6.31608	0.0861		8.20693	12.5422	0.0856776
6715	Sample49	0.00828354	1.11e-06	0.0488722	2.35e-06	6.55965	0.0753
6715	Sample50	0.0083147	1.11e-06	0.0492786	2.69e-06	6.04271	0.0576		8.34393	12.6798	0.0886974
6715	Sample51	0.00828212	9.47e-07	0.0488695	2.48e-06	6.55198	0.0682
6715	Sample52	0.00830787	1.57e-06	0.0492622	3e-06	4.78083	0.0582		7.96009	12.2943	0.0975653
6715	Sample53	0.00827847	1.02e-06	0.0488769	2.78e-06	6.28101	0.0674
6715	Sample54	0.00831523	1.07e-06	0.0492659	2.49e-06	6.43196	0.091		7.9727	12.307	0.0924905
6715	Sample55	0.00828329	9.87e-07	0.0488755	2.57e-06	6.64871	0.0753
6715	Sample56	0.00831465	1.14e-06	0.0492669	2.82e-06	5.65688	0.0668		8.06451	12.3992	0.0938445
6715	Sample57	0.00828164	1.01e-06	0.0488701	2.57e-06	6.1879	0.065
6715	Sample58	0.00831472	1.21e-06	0.0492767	2.77e-06	6.16292	0.0816		8.20325	12.5385	0.0896894
6715	Sample59	0.00828161	1.11e-06	0.0488815	2.25e-06	6.54184	0.0629
6715	Sample60	0.00831758	9.94e-07	0.0492775	2.36e-06	6.20584	0.0991		8.13092	12.4659	0.0817602
6715	Sample61	0.00828246	1.08e-06	0.0488787	2.33e-06	6.59153	0.0704
6715	Sample62	0.00831001	1.18e-06	0.0492777	2.93e-06	6.31011	0.0914		8.12676	12.4617	0.0952122
6715	Sample63	0.00827885	1.12e-06	0.0488823	2.79e-06	6.56285	0.0695
6715	Sample64	0.00831107	1.13e-06	0.049268	2.71e-06	6.16531	0.0804		7.96131	12.2955	0.0906548
6715	Sample65	0.00827901	1.08e-06	0.0488754	2.15e-06	6.71875	0.0798
6715	Sample66	0.00831713	1.29e-06	0.0492914	2.78e-06	6.63983	0.0754		8.34257	12.6784	0.0875682
6715	Sample67	0.00828683	1.07e-06	0.0488918	2.47e-06	7.22205	0.0826
6715	Sample68	0.00831858	9.51e-07	0.0492975	2.95e-06	6.70196	0.0987		8.25512	12.5906	0.0934155
6715	Sample69	0.00828481	1.01e-06	0.048896	2.49e-06	7.02934	0.0987
6715	Sample70	0.00831826	8.5e-07	0.0492954	2.94e-06	6.41543	0.0691		8.18031	12.5155	0.0917666
6715	Sample71	0.00828362	1.13e-06	0.0488949	2.33e-06	6.92435	0.0818
6715	Sample72	0.00831702	1.21e-06	0.0493024	2.45e-06	6.72015	0.0854		8.28503	12.6207	0.0864929
6715	Sample73	0.00828528	8.63e-07	0.0488996	2.56e-06	7.06663	0.091
6715	Sample74	0.00831887	9.62e-07	0.0492987	2.77e-06	6.72894	0.0924		8.13348	12.4685	0.0913606
6715	Sample75	0.00828659	1.14e-06	0.0489023	2.42e-06	6.07188	0.0737
6715	Sample76	0.00832112	9.82e-07	0.0493026	2.97e-06	6.41846	0.0731		8.21251	12.5478	0.0943654
6715	Sample77	0.00828278	1.04e-06	0.0488997	2.6e-06	7.12477	0.0834
6715	Sample78	0.00832053	9.56e-07	0.0493025	2.44e-06	7.17745	0.0801		8.25171	12.5872	0.0895392
6715	Sample79	0.00828599	1.11e-06	0.0488982	2.56e-06	7.11984	0.0857
6715	Sample80	0.00832123	1.06e-06	0.0493037	2.26e-06	7.12779	0.0797		8.22563	12.561	0.0875702
6715	Sample81	0.00828538	1.07e-06	0.0489047	2.6e-06	7.10134	0.0837
6715	Sample82	0.00831876	8.96e-07	0.049308	2.23e-06	6.91414	0.0862		8.24089	12.5763	0.0859161
6715	Sample83	0.00828408	1.2e-06	0.0489051	2.45e-06	7.07837	0.0797
6715	Sample84	0.00831848	1e-06	0.0493016	2.31e-06	6.61421	0.101		8.09764	12.4325	0.0853024
6715	Sample85	0.00828508	1.11e-06	0.048906	2.48e-06	7.15504	0.0828
6715	Sample86	0.00831698	1.05e-06	0.0493055	2.69e-06	6.8766	0.0856		8.15429	12.4894	0.0884176
6715	Sample87	0.00828521	1.01e-06	0.0489075	2.33e-06	7.14039	0.0714
6715	Sample88	0.00831881	9.41e-07	0.0493102	2.6e-06	7.313	0.0895		8.20649	12.5418	0.0882576
6715	Sample89	0.00828351	1.06e-06	0.0489102	2.56e-06	7.42834	0.0778
6715	Sample90	0.00831845	1.07e-06	0.0493122	2.29e-06	6.94141	0.0941		8.20792	12.5432	0.0873818
6715	Sample91	0.008282	1.06e-06	0.0489112	2.56e-06	7.1372	0.0653
6715	Sample92	0.00832047	1.03e-06	0.0493197	2.3e-06	6.98654	0.0934		8.37423	12.7102	0.0855696
6715	Sample93	0.0082858	1.16e-06	0.0489091	2.4e-06	6.91977	0.0923
6715	Sample94	0.00831631	9.17e-07	0.0493147	2.6e-06	6.98702	0.0692		8.2351	12.5705	0.0884347
6715	Sample95	0.0082833	1.01e-06	0.0489148	2.51e-06	7.49501	0.0847
6715	Sample96	0.00832205	9.53e-07	0.0493266	2.26e-06	7.15468	0.0826		8.44098	12.7773	0.0888442
6715	Sample97	0.00828422	9.56e-07	0.0489127	2.75e-06	7.46318	0.0923
6716	Sample1	0.00827541	9.16e-07	0.0488932	2.92e-06	7.63688	0.0998
6716	Sample2	0.00830668	9.96e-07	0.0493126	2.71e-06	7.38197	0.0723		8.3942	12.7303	0.0953727
6716	Sample3	0.00827302	9.28e-07	0.048911	2.45e-06	7.29009	0.0941
6716	Sample4	0.00830555	1.03e-06	0.049322	2.56e-06	7.34558	0.0778		8.49818	12.8347	0.0909626
6716	Sample5	0.00826799	1.15e-06	0.0489018	2.71e-06	7.26334	0.0815
6716	Sample6	0.00830903	9.48e-07	0.0493251	2.84e-06	7.51516	0.0839		8.64539	12.9826	0.0918067
6716	Sample7	0.00827382	1.03e-06	0.048903	2.21e-06	7.19822	0.0752
6716	Sample8	0.00830536	9.88e-07	0.0493227	2.88e-06	7.57599	0.107		8.58074	12.9176	0.0926878
6716	Sample9	0.00827501	1.08e-06	0.0489033	2.74e-06	7.54692	0.0753
6716	Sample10	0.00831027	1.16e-06	0.0493231	2.29e-06	7.37029	0.102		8.55778	12.8946	0.0856556
6716	Sample11	0.00827828	7.95e-07	0.048906	2.21e-06	7.92722	0.099
6716	Sample12	0.00830919	1.16e-06	0.0493223	2.57e-06	7.16959	0.0776		8.45575	12.7921	0.0838235
6716	Sample13	0.00827415	1.08e-06	0.0489115	2.33e-06	7.65018	0.0887
6716	Sample14	0.00831126	4.98e-07	0.0493308	1.61e-06	39.2085	0.171		8.1847	12.5199	0.0757525
6716	Sample15	0.00828071	9.71e-07	0.0489492	2.4e-06	8.04003	0.0977
6716	Sample16	0.00831469	4.6e-07	0.0493557	1.49e-06	35.038	0.309		8.16313	12.4982	0.0762832
6716	Sample17	0.00827883	1.1e-06	0.048963	2.45e-06	8.15313	0.0917
6716	Sample18	0.00831183	5.31e-07	0.0493713	1.81e-06	36.8037	0.257		8.20716	12.5425	0.0877534
6716	Sample19	0.00828038	9.44e-07	0.0489758	3.04e-06	7.89339	0.0852
6716	Sample20	0.0083064	4.68e-07	0.0493679	1.7e-06	37.8323	0.235		7.90537	12.2394	0.0890012
6716	Sample21	0.00827632	1.01e-06	0.0489855	2.63e-06	8.10559	0.0787
6716	Sample22	0.00830719	6.05e-07	0.0493831	1.68e-06	38.854	0.197		8.09765	12.4325	0.0892599
6716	Sample23	0.00827451	1.02e-06	0.0489873	3.07e-06	8.32804	0.104
6716	Sample24	0.00830467	1.07e-06	0.0493628	2.79e-06	8.12664	0.102		8.05901	12.3937	0.100485
6716	Sample25	0.00827345	9.96e-07	0.048949	2.67e-06	7.64759	0.117
6716	Sample26	0.00830949	5.44e-07	0.0493586	1.91e-06	39.8242	0.174		7.98045	12.3148	0.0877117
6716	Sample27	0.00828068	9.04e-07	0.0489866	2.78e-06	8.7255	0.0902
6716	Sample28	0.00831142	1.09e-06	0.0493743	2.87e-06	7.67314	0.0889		8.17465	12.5098	0.0945647
6716	Sample29	0.00827663	9.26e-07	0.0489613	2.37e-06	8.40304	0.0926
6716	Sample30	0.00830577	1.03e-06	0.0493423	2.29e-06	7.78987	0.0948		7.90312	12.2371	0.0818831
6716	Sample31	0.00827695	9.38e-07	0.0489494	2.3e-06	8.18267	0.0833
6716	Sample32	0.00830806	9.89e-07	0.0493358	2.59e-06	7.20404	0.0926		8.02731	12.3618	0.0795726
6716	Sample33	0.00827523	9.53e-07	0.0489364	1.81e-06	8.05591	0.0961
6716	Sample34	0.00830928	1.05e-06	0.0493359	2.5e-06	7.44354	0.0823		8.0965	12.4313	0.0760053
6716	Sample35	0.00827779	1.01e-06	0.0489429	2.1e-06	8.10039	0.1
6716	Sample36	0.00830973	1.04e-06	0.0493395	3.36e-06	7.3219	0.0886		8.06707	12.4018	0.0947843
6716	Sample37	0.00826832	1.02e-06	0.0489464	2.45e-06	7.91042	0.086
6716	Sample38	0.0083052	1.06e-06	0.0493334	2.34e-06	7.49529	0.0774		7.94234	12.2765	0.0863054
6716	Sample39	0.00827681	9.88e-07	0.0489429	2.54e-06	7.88816	0.088
6716	Sample40	0.00830824	9.61e-07	0.0493371	2.82e-06	7.37112	0.0784		8.08878	12.4236	0.0926863
6716	Sample41	0.00827269	8.67e-07	0.0489396	2.51e-06	7.87639	0.077
6716	Sample42	0.00830963	1.02e-06	0.049333	2.79e-06	7.2694	0.0789		8.0459	12.3805	0.0877804
6716	Sample43	0.00827172	1.15e-06	0.0489389	2.12e-06	7.73264	0.0766
6716	Sample44	0.00831007	9.73e-07	0.0493401	2.15e-06	7.36042	0.0877		8.18243	12.5176	0.0812263
6716	Sample45	0.00828098	9.33e-07	0.0489404	2.6e-06	7.92118	0.0942
6716	Sample46	0.00830926	8.69e-07	0.0493431	2.52e-06	7.54057	0.101		8.21581	12.5511	0.0888584
6716	Sample47	0.00827387	9.32e-07	0.0489416	2.43e-06	7.81222	0.0784
6716	Sample48	0.00830908	1.02e-06	0.0493382	2.57e-06	7.18898	0.098		8.10549	12.4403	0.0824547
6716	Sample49	0.00826952	8.55e-07	0.0489414	1.97e-06	7.84968	0.0742
6716	Sample50	0.00830203	1.01e-06	0.0493365	2.3e-06	7.27158	0.111		8.1101	12.445	0.07976
6716	Sample51	0.00827495	1.15e-06	0.0489378	2.48e-06	7.75908	0.0988
6716	Sample52	0.00831216	1.02e-06	0.0493476	2.45e-06	7.34447	0.0747		8.37358	12.7096	0.0886322
6716	Sample53	0.00827425	1.01e-06	0.0489379	2.6e-06	7.76407	0.094
6716	Sample54	0.00830711	1.09e-06	0.049333	2.73e-06	7.01206	0.0879		8.07309	12.4078	0.0897528
6716	Sample55	0.0082734	8.75e-07	0.0489379	2.28e-06	7.86525	0.0914
6716	Sample56	0.00830587	1.1e-06	0.0493317	2.88e-06	7.26353	0.0938		8.13624	12.4712	0.0884708
6716	Sample57	0.00827113	1.12e-06	0.0489293	2.32e-06	7.66686	0.0959
6716	Sample58	0.00830595	8.3e-07	0.0493436	2.87e-06	7.66947	0.098		8.40703	12.7432	0.0925407
6716	Sample59	0.00827502	9.95e-07	0.0489352	2.65e-06	7.50281	0.0858
6716	Sample60	0.00830658	1.12e-06	0.0493416	2.54e-06	7.22902	0.0864		8.2724	12.608	0.0885965
6716	Sample61	0.00826952	8.95e-07	0.0489384	2.33e-06	7.9058	0.0777
6716	Sample62	0.00830441	8.31e-07	0.0493372	2.59e-06	7.29834	0.0911		8.19847	12.5337	0.0821195
6716	Sample63	0.00826261	1.03e-06	0.0489335	2.03e-06	7.90485	0.0937
6716	Sample64	0.00830159	1.04e-06	0.0493371	2.3e-06	7.44981	0.102		8.25556	12.5911	0.0765563
6716	Sample65	0.00826892	1.07e-06	0.0489327	2.17e-06	7.53568	0.0911
6716	Sample66	0.00830674	8.95e-07	0.0493432	2.81e-06	7.12104	0.0746		8.41185	12.748	0.0866968
6716	Sample67	0.00826595	9.78e-07	0.0489305	2.35e-06	7.51465	0.0755
6716	Sample68	0.00830095	1.01e-06	0.0493434	2.49e-06	7.31537	0.0731		8.35082	12.6867	0.0877347
6716	Sample69	0.00826593	9.24e-07	0.048939	2.61e-06	7.4895	0.0851
6716	Sample70	0.00829523	1.18e-06	0.0493394	3.02e-06	6.98683	0.079		8.24548	12.5809	0.0994408
6716	Sample71	0.00827044	1.03e-06	0.0489328	2.81e-06	7.27389	0.111
6716	Sample72	0.00830566	1.02e-06	0.0493445	2.72e-06	7.11165	0.0957		8.40595	12.7421	0.093071
6716	Sample73	0.00826957	8.45e-07	0.0489336	2.36e-06	7.44464	0.0872
6716	Sample74	0.00830826	1.11e-06	0.0493445	3.19e-06	7.12214	0.0822		8.45428	12.7906	0.09985
6716	Sample75	0.0082672	1.31e-06	0.0489281	2.88e-06	7.10438	0.11
6716	Sample76	0.00830125	9.07e-07	0.0493419	2.57e-06	7.05409	0.0748		8.47112	12.8075	0.0963899
6716	Sample77	0.00826793	9.88e-07	0.0489268	2.73e-06	6.95428	0.117
6716	Sample78	0.00830679	1.1e-06	0.0493413	2.65e-06	7.18856	0.0835		8.41269	12.7489	0.0958087
6716	Sample79	0.00826059	1.06e-06	0.0489326	2.76e-06	7.53155	0.103
6716	Sample80	0.00830115	1.13e-06	0.0493456	2.52e-06	7.04998	0.0806		8.44007	12.7764	0.0981005
6716	Sample81	0.00826892	1.16e-06	0.0489327	3.03e-06	7.22486	0.118
6716	Sample82	0.00830453	1.03e-06	0.0493487	2.55e-06	7.4042	0.0922		8.39618	12.7323	0.0997149
6716	Sample83	0.00826504	8.91e-07	0.0489429	2.87e-06	7.70369	0.0839
6716	Sample84	0.00829364	1.06e-06	0.0493485	2.86e-06	7.50237	0.103		8.36643	12.7024	0.0973162
6716	Sample85	0.00826438	1.08e-06	0.0489351	2.53e-06	7.75436	0.089
6716	Sample86	0.00829508	1.18e-06	0.0493542	2.4e-06	7.22019	0.102		8.41645	12.7526	0.0848956
6716	Sample87	0.00825892	1.15e-06	0.0489494	2.28e-06	7.91207	0.0857
6716	Sample88	0.00829577	1.15e-06	0.0493466	2.29e-06	7.05066	0.102		8.18711	12.5223	0.0811762
6716	Sample89	0.00825623	1.21e-06	0.0489423	2.33e-06	7.95302	0.0882
6716	Sample90	0.00830576	1.22e-06	0.0493462	2.44e-06	7.29878	0.0681		8.20716	12.5424	0.0836476
6716	Sample91	0.00826698	8.8e-07	0.0489466	2.34e-06	7.84361	0.089
6716	Sample92	0.0082909	1.2e-06	0.0493492	2.53e-06	7.24991	0.0989		8.28132	12.6169	0.0819763
6716	Sample93	0.00825932	1.3e-06	0.0489412	2.08e-06	7.76215	0.0782
6716	Sample94	0.00828639	3.91e-06	0.0493474	6.57e-06	2.00091	0.142		8.3151	12.6509	0.147124
6716	Sample95	0.00827443	9.27e-07	0.0489397	2.25e-06	7.84867	0.0777
6716	Sample96	0.00830463	9e-07	0.0493548	2.71e-06	7.1876	0.0731		8.43767	12.7739	0.086107	12.5705	0.314674	n=96
6716	Sample97	0.00827363	9.12e-07	0.0489439	2.34e-06	7.9653	0.088
