# Supplementary material for: TC1725: a proposed chalcopyrite reference material for LA-MC-ICP-MS sulfur isotope determination
Source: Royal Society of Chemistry journal article supplement (doi:10.1039/d1ja00168j), 2021-01-01
Supplement: d1ja00168j3.xlsx [file d1ja00168j3.xlsx]

## Sheet: 黄铜矿TC1725
FileName	SampleName	'33/32 Raw'	SE	'34/32 Raw'	SE	'Total Beam (V)'	SE
6717	Sample57	0.0082426	1.39e-06	0.0489676	2.35e-06	8.2405	0.0953		Strip 1
6717	Sample58	0.00828756	1.11e-06	0.0493592	2.42e-06	7.38881	0.1		8.13661	12.4716	0.0854052
6717	Sample59	0.00825165	1.14e-06	0.048954	2.49e-06	7.49234	0.11
6717	Sample60	0.00828483	1.02e-06	0.0493602	2.87e-06	7.20525	0.0808		8.16661	12.5017	0.0911618
6717	Sample61	0.00825536	1.08e-06	0.0489667	2.37e-06	8.31345	0.107
6717	Sample62	0.00827823	1.18e-06	0.0493644	2.64e-06	7.44562	0.0941		8.11782	12.4527	0.0831944
6717	Sample63	0.00824521	1.32e-06	0.0489672	2.03e-06	7.95025	0.0772
6717	Sample64	0.00826801	1.41e-06	0.0493612	2.62e-06	7.03073	0.0908		8.0497	12.3843	0.083056
6717	Sample65	0.00822374	1.86e-06	0.0489668	2.38e-06	8.02664	0.0813
6717	Sample66	0.00825902	1.44e-06	0.0493629	2.65e-06	7.25233	0.0805		8.12796	12.4629	0.0887258
6717	Sample67	0.00823639	1.31e-06	0.048963	2.51e-06	8.08045	0.0872
6717	Sample68	0.00826373	1.66e-06	0.049361	2.52e-06	7.65167	0.101		8.10871	12.4436	0.087046
6717	Sample69	0.00822864	1.31e-06	0.048965	2.37e-06	7.99909	0.0785
6717	Sample70	0.00826384	1.16e-06	0.0493598	2.69e-06	7.43587	0.0869		8.04386	12.3785	0.0917663
6717	Sample71	0.00822197	1.75e-06	0.0489668	2.73e-06	7.82437	0.117
6717	Sample72	0.00824825	1.37e-06	0.0493662	2.63e-06	7.04017	0.0922		8.0814	12.4162	0.0910408
6717	Sample73	0.00822119	1.76e-06	0.0489741	2.37e-06	8.12761	0.0984
6717	Sample74	0.00827943	1.29e-06	0.049369	2.86e-06	7.37463	0.0764		8.06395	12.3986	0.0889014
6717	Sample75	0.00824021	1.29e-06	0.0489741	2.3e-06	8.07016	0.0914
6717	Sample76	0.00826359	1.5e-06	0.0493646	2.48e-06	7.57595	0.102		8.02269	12.3572	0.0848051
6717	Sample77	0.00823491	1.61e-06	0.0489693	2.43e-06	7.94398	0.0925
6717	Sample78	0.00824505	1.46e-06	0.0493635	2.17e-06	6.87782	0.0868		8.04799	12.3826	0.0801974
6717	Sample79	0.00822578	1.31e-06	0.0489694	2.21e-06	7.83168	0.0804
6717	Sample80	0.00825425	1.38e-06	0.0493735	2.32e-06	7.74369	0.102		8.21513	12.5505	0.0805536
6717	Sample81	0.00822581	1.64e-06	0.0489731	2.32e-06	7.99843	0.0852
6717	Sample82	0.00826051	1.35e-06	0.0493706	2.79e-06	7.50488	0.0741		8.12338	12.4583	0.090508
6717	Sample83	0.00821624	1.47e-06	0.0489726	2.57e-06	7.66696	0.0759
6717	Sample84	0.00826738	1.74e-06	0.0493676	2.87e-06	7.26938	0.0886		8.07602	12.4107	0.092064
6717	Sample85	0.00823002	1.53e-06	0.0489717	2.37e-06	8.02793	0.072
6717	Sample86	0.0082883	1.17e-06	0.0493777	2.56e-06	7.43985	0.107		8.27702	12.6126	0.0852892
6717	Sample87	0.00823598	1.22e-06	0.0489729	2.32e-06	8.43953	0.102
6717	Sample88	0.00823987	1.76e-06	0.0493738	2.35e-06	7.36046	0.0702		8.14416	12.4792	0.0818277
6717	Sample89	0.0082198	1.36e-06	0.0489771	2.29e-06	8.0458	0.0849
6717	Sample90	0.00824191	1.51e-06	0.0493727	2.88e-06	7.3273	0.102		8.04977	12.3844	0.0933715
6717	Sample91	0.0082095	1.71e-06	0.0489797	2.74e-06	8.02873	0.0642
6717	Sample92	0.00825268	1.72e-06	0.0493735	2.49e-06	7.32555	0.0885		8.0589	12.3936	0.0885432
6717	Sample93	0.0082141	1.14e-06	0.0489778	2.28e-06	8.35576	0.0972
6717	Sample94	0.00824346	1.62e-06	0.0493801	2.13e-06	7.2873	0.0814		8.17389	12.509	0.0759095
6717	Sample95	0.00823765	9.48e-07	0.0489817	2.04e-06	8.29532	0.103
6717	Sample96	0.00824588	1.69e-06	0.0493754	2.77e-06	7.57862	0.0959		8.02227	12.3568	0.0821891
6717	Sample97	0.00820693	1.69e-06	0.0489831	2.12e-06	8.27818	0.0721
6720	Sample1	0.00828745	9.36e-07	0.0490036	2.37e-06	7.84775	0.0819
6720	Sample2	0.008321	8.34e-07	0.0494131	2.48e-06	7.5564	0.103		8.30015	12.6358	0.083686
6720	Sample3	0.00828739	7.7e-07	0.0490091	2.27e-06	8.09688	0.0921
6720	Sample4	0.00832198	1.11e-06	0.049419	2.53e-06	7.4666	0.0772		8.33948	12.6753	0.0824592
6720	Sample5	0.00828643	9.08e-07	0.0490114	2.21e-06	8.21373	0.0944
6720	Sample6	0.00831508	8.94e-07	0.04942	2.49e-06	7.8201	0.0978		8.37758	12.7136	0.0851944
6720	Sample7	0.00828366	9.99e-07	0.0490074	2.54e-06	7.6178	0.106
6720	Sample8	0.0083208	1.09e-06	0.0494134	2.78e-06	7.04811	0.103		8.31049	12.6462	0.0957229
6720	Sample9	0.00828626	1e-06	0.0490049	2.82e-06	7.20669	0.103
6720	Sample10	0.00832513	8.89e-07	0.0494225	2.47e-06	7.79324	0.102		8.44083	12.7771	0.0926287
6720	Sample11	0.00829138	1.02e-06	0.0490127	2.58e-06	7.54355	0.111
6720	Sample12	0.00832244	8.71e-07	0.0494117	2.39e-06	7.5876	0.103		8.1466	12.4816	0.0861917
6720	Sample13	0.00828268	9.64e-07	0.0490122	2.36e-06	7.85071	0.0944
6720	Sample14	0.00831918	1.12e-06	0.0494113	2.14e-06	7.47282	0.0905		8.17414	12.5093	0.0848938
6720	Sample15	0.00828164	8.71e-07	0.0490092	2.69e-06	7.59016	0.114
6720	Sample16	0.00831896	9.26e-07	0.049421	2.66e-06	7.57289	0.106		8.44098	12.7773	0.0877145
6720	Sample17	0.00828209	9.27e-07	0.0490055	2.07e-06	7.64763	0.107
6720	Sample18	0.00831796	1e-06	0.0494193	2.73e-06	6.96276	0.0857		8.36175	12.6977	0.0848159
6720	Sample19	0.00828795	7.28e-07	0.0490135	2.38e-06	8.0335	0.0867
6720	Sample20	0.008322	9.91e-07	0.0494181	2.09e-06	7.52902	0.075		8.20139	12.5367	0.0822706
6720	Sample21	0.00828674	9.03e-07	0.0490187	2.51e-06	7.89546	0.101
6720	Sample22	0.00831947	9.43e-07	0.0494157	2.34e-06	7.61675	0.0978		8.08075	12.4155	0.0841718
6720	Sample23	0.00828767	9.02e-07	0.0490204	2.31e-06	8.09178	0.0804
6720	Sample24	0.00831682	1.06e-06	0.0494194	2.36e-06	7.43307	0.0996		8.19922	12.5345	0.0809477
6720	Sample25	0.00827698	9.67e-07	0.0490145	2.22e-06	7.83305	0.0908
6720	Sample26	0.00831449	1.1e-06	0.0494259	2.8e-06	7.52574	0.0822		8.36999	12.706	0.0857268
6720	Sample27	0.00828141	9.86e-07	0.0490167	2.24e-06	8.03005	0.113
6720	Sample28	0.00831338	9.42e-07	0.0494274	2.87e-06	7.56067	0.0751		8.43762	12.7739	0.0863514
6720	Sample29	0.00828384	1.11e-06	0.0490109	2.19e-06	7.5811	0.0752
6720	Sample30	0.00831768	1.02e-06	0.0494201	2.62e-06	7.54736	0.0912		8.17988	12.515	0.0810722
6720	Sample31	0.0082785	9.68e-07	0.0490273	2.06e-06	7.92006	0.0866
6720	Sample32	0.00831594	1.26e-06	0.0494227	2.67e-06	7.5568	0.0931		8.10242	12.4373	0.082291
6720	Sample33	0.00828019	1.03e-06	0.0490236	2.24e-06	8.03102	0.0748
6720	Sample34	0.00831417	1.14e-06	0.0494218	2.41e-06	7.43485	0.0793		8.20849	12.5438	0.0832078
6720	Sample35	0.00828373	1.06e-06	0.0490151	2.43e-06	7.5607	0.101
6720	Sample36	0.00831292	1.11e-06	0.049427	2.51e-06	7.74774	0.0932		8.42986	12.7661	0.0921381
6720	Sample37	0.00827801	1.03e-06	0.0490126	2.88e-06	7.60658	0.0864
6720	Sample38	0.00831253	9.37e-07	0.0494224	2.43e-06	7.93814	0.1		8.33735	12.6732	0.0903823
6720	Sample39	0.00828319	9.75e-07	0.049015	2.35e-06	7.66689	0.107
6720	Sample40	0.00831825	1.02e-06	0.0494228	2.39e-06	7.60119	0.0795		8.25705	12.5926	0.0838697
6720	Sample41	0.00828159	8.94e-07	0.0490212	2.4e-06	7.94993	0.0823
6720	Sample42	0.00832016	9.47e-07	0.0494217	2.69e-06	7.48071	0.126		8.17076	12.5059	0.0862989
6720	Sample43	0.00828633	1.01e-06	0.0490211	2.24e-06	8.15984	0.0982
6720	Sample44	0.00831566	1.01e-06	0.049427	2.25e-06	7.6628	0.094		8.26015	12.5957	0.0842875
6720	Sample45	0.00828019	9.01e-07	0.0490231	2.66e-06	7.96161	0.0789
6720	Sample46	0.00831882	7.95e-07	0.0494321	2.19e-06	7.59078	0.0813		8.37088	12.7069	0.0844248
6720	Sample47	0.00827634	1.06e-06	0.0490204	2.31e-06	7.93038	0.0985
6720	Sample48	0.00830922	1.17e-06	0.0494117	2.63e-06	6.95799	0.0688		7.96564	12.2999	0.0860855
6720	Sample49	0.0082757	1.01e-06	0.049022	2.38e-06	8.01514	0.0819
6720	Sample50	0.00831608	9.87e-07	0.0494215	2.86e-06	7.45512	0.0803		8.19999	12.5352	0.0914878
6720	Sample51	0.00827461	1.01e-06	0.0490172	2.53e-06	7.68921	0.104
6720	Sample52	0.00830555	1.38e-06	0.0494194	2.68e-06	7.41654	0.114		8.18266	12.5178	0.0890101
6720	Sample53	0.00827105	1.3e-06	0.0490194	2.36e-06	7.78495	0.082
6720	Sample54	0.00829973	1.23e-06	0.0494173	2.49e-06	7.57712	0.0856		8.10959	12.4445	0.0880746
6720	Sample55	0.00827893	8.89e-07	0.0490202	2.64e-06	7.71506	0.0741
6720	Sample56	0.00830376	1.03e-06	0.0494228	2.3e-06	7.5487	0.0926		8.22076	12.5561	0.0837124
6720	Sample57	0.00827212	9.1e-07	0.0490195	2.16e-06	7.82519	0.0736
6720	Sample58	0.00830872	8.56e-07	0.0494209	2.41e-06	7.40123	0.0824		8.24319	12.5786	0.0861506
6720	Sample59	0.00827586	1.23e-06	0.0490142	2.73e-06	7.06436	0.11
6720	Sample60	0.00830886	1.04e-06	0.0494241	2.47e-06	7.37566	0.0711		8.31319	12.6489	0.0898751
6720	Sample61	0.00827455	1.13e-06	0.0490191	2.44e-06	7.84764	0.083
6721	Sample1	0.00825932	1.56e-06	0.0489917	2.95e-06	4.84763	0.084
6721	Sample2	0.00828309	1.71e-06	0.0494024	2.88e-06	3.96495	0.0454		8.39057	12.7266	0.102372
6721	Sample3	0.00825515	1.63e-06	0.0489909	2.88e-06	4.75221	0.0589
6721	Sample4	0.00829247	1.65e-06	0.0494173	3.5e-06	4.55976	0.0484		8.64972	12.9869	0.106759
6721	Sample5	0.00825025	1.85e-06	0.048996	2.65e-06	4.74687	0.0618
6721	Sample6	0.00827856	1.76e-06	0.0494203	2.97e-06	4.59161	0.0507		8.63622	12.9734	0.106148
6721	Sample7	0.00825761	1.76e-06	0.0489983	3.37e-06	5.08821	0.0644
6721	Sample8	0.00830007	1.49e-06	0.0494204	3.29e-06	4.89653	0.0551		8.57403	12.9109	0.118342
6721	Sample9	0.00825188	1.57e-06	0.0490022	3.41e-06	5.0933	0.0723
6721	Sample10	0.00828168	1.7e-06	0.0494242	2.96e-06	4.90534	0.0414		8.61608	12.9531	0.110465
6721	Sample11	0.00825512	1.5e-06	0.0490018	3.01e-06	5.18303	0.0606
6721	Sample12	0.00828138	1.49e-06	0.0494242	3.06e-06	5.05517	0.0605		8.50525	12.8418	0.100021
6721	Sample13	0.00825564	1.25e-06	0.049013	2.4e-06	5.50843	0.0525
6721	Sample14	0.00828338	1.63e-06	0.0494222	2.67e-06	5.29626	0.0649		8.45765	12.794	0.0932684
6721	Sample15	0.00825679	1.61e-06	0.0490024	2.85e-06	5.41157	0.089
6721	Sample16	0.00827543	1.37e-06	0.0494231	2.47e-06	5.30209	0.0521		8.50364	12.8402	0.0895853
6721	Sample17	0.00825245	1.44e-06	0.0490104	2.27e-06	5.69085	0.0584
6721	Sample18	0.00828177	1.41e-06	0.0494211	2.65e-06	5.42834	0.0767		8.44673	12.7831	0.0935058
6721	Sample19	0.00825334	1.17e-06	0.0490038	2.99e-06	5.27208	0.0876
6721	Sample20	0.00830221	1.42e-06	0.0494166	2.42e-06	5.45666	0.0661		8.44802	12.7843	0.0952254
6721	Sample21	0.00825725	1.4e-06	0.0490014	2.66e-06	5.91697	0.079
6721	Sample22	0.00827878	1.34e-06	0.0494206	2.73e-06	5.8228	0.0616		8.4923	12.8288	0.0924038
6721	Sample23	0.00825315	1.5e-06	0.0490075	2.47e-06	5.68546	0.0791
6721	Sample24	0.00829246	1.53e-06	0.0494262	2.56e-06	5.82232	0.0575		8.44987	12.7862	0.0896463
6721	Sample25	0.0082678	1.36e-06	0.0490165	2.6e-06	5.99397	0.054
6721	Sample26	0.00828845	1.14e-06	0.0494173	2.56e-06	5.88354	0.0695		8.26621	12.6018	0.0921286
6721	Sample27	0.00824353	1.47e-06	0.0490078	2.68e-06	6.09615	0.0707
6721	Sample28	0.00828596	1.63e-06	0.0494227	2.66e-06	6.08516	0.0656		8.45942	12.7958	0.0916886
6721	Sample29	0.0082347	1.59e-06	0.0490084	2.46e-06	6.31344	0.0883
6721	Sample30	0.00826522	2.23e-06	0.0494211	2.8e-06	5.95481	0.0608		8.46617	12.8026	0.095332
6721	Sample31	0.00821383	2.29e-06	0.0490041	2.84e-06	6.20229	0.0651
6721	Sample32	0.0082616	1.67e-06	0.0494219	2.38e-06	6.00673	0.0618		8.51769	12.8543	0.0958113
6721	Sample33	0.00822935	1.67e-06	0.0490048	2.9e-06	5.99057	0.0826
6721	Sample34	0.00827976	1.43e-06	0.0494206	2.81e-06	5.93852	0.0765		8.4957	12.8322	0.098058
6721	Sample35	0.00823977	1.55e-06	0.0490036	2.63e-06	6.09372	0.0831
6721	Sample36	0.00827596	1.25e-06	0.0494164	2.99e-06	6.04198	0.0767		8.30381	12.6395	0.0997298
6721	Sample37	0.00825107	1.29e-06	0.0490153	2.86e-06	6.47082	0.072
6721	Sample38	0.00827382	1.64e-06	0.0494316	2.65e-06	7.27114	0.0923		8.58966	12.9266	0.0970956
6721	Sample39	0.0082436	1.26e-06	0.049006	2.75e-06	6.31726	0.0687
6721	Sample40	0.00828461	1.69e-06	0.0494117	3.04e-06	6.07634	0.0861		8.24782	12.5833	0.0990652
6721	Sample41	0.00822404	1.51e-06	0.0490091	2.63e-06	6.50929	0.0737
6721	Sample42	0.00825911	1.52e-06	0.0494197	2.42e-06	6.15533	0.0566		8.38472	12.7208	0.0920449
6721	Sample43	0.00824121	1.45e-06	0.0490085	2.77e-06	6.66968	0.0792
6721	Sample44	0.00825151	1.19e-06	0.0494231	1.26e-06	19.482	0.0577		8.31553	12.6513	0.080934
6721	Sample45	0.00821723	1.61e-06	0.0490225	2.55e-06	7.08492	0.0649
6721	Sample46	0.00827236	1.36e-06	0.0494067	2.66e-06	6.50594	0.0646		7.98208	12.3164	0.0993369
6721	Sample47	0.00822525	1.4e-06	0.0490083	3.2e-06	6.39838	0.0967
6721	Sample48	0.00825737	2.03e-06	0.0494207	2.45e-06	6.79008	0.0687		8.38621	12.7223	0.0954934
6721	Sample49	0.00824106	1.74e-06	0.049011	2.4e-06	6.57476	0.0954
6721	Sample50	0.00825863	2.66e-06	0.0494122	2.65e-06	6.75066	0.0808		8.14868	12.4837	0.0916468
6721	Sample51	0.00822526	1.8e-06	0.0490147	2.74e-06	7.1193	0.0827
6721	Sample52	0.00826979	1.41e-06	0.0494114	2.75e-06	6.54407	0.0743		8.19315	12.5284	0.0976418
6721	Sample53	0.00821909	1.64e-06	0.049005	2.82e-06	6.58082	0.0797
6721	Sample54	0.00824584	1.69e-06	0.0494137	2.93e-06	6.43792	0.0571		8.22084	12.5562	0.10127
6721	Sample55	0.00823578	1.36e-06	0.0490166	2.87e-06	6.76892	0.0629
6721	Sample56	0.00825852	1.52e-06	0.0494082	2.43e-06	6.93308	0.112		7.9805	12.3148	0.0888727
6721	Sample57	0.00822691	1.42e-06	0.0490174	2.22e-06	7.22301	0.0806
6721	Sample58	0.00825014	1.77e-06	0.049416	2.46e-06	7.00675	0.0815		8.12349	12.4584	0.0832263
6721	Sample59	0.00821552	1.43e-06	0.0490181	2.4e-06	7.43953	0.0892
6721	Sample60	0.00825344	1.79e-06	0.0494159	2.7e-06	6.88661	0.104		8.27139	12.607	0.0899472
6721	Sample61	0.00822712	1.49e-06	0.0490029	2.55e-06	7.29815	0.0799
6721	Sample62	0.00823962	1.61e-06	0.0494244	2.81e-06	6.69665	0.0689		8.58167	12.9186	0.0918688
6721	Sample63	0.00821481	2.15e-06	0.0490048	2.45e-06	6.64592	0.113
6721	Sample64	0.00823785	1.84e-06	0.0494025	2.54e-06	6.76055	0.12		8.14146	12.4765	0.0901893
6721	Sample65	0.00819897	1.89e-06	0.0490022	2.68e-06	6.99114	0.0899
6721	Sample66	0.00824538	1.3e-06	0.0494073	1.24e-06	7.15866	0.143		8.06409	12.3988	0.0831069
6721	Sample67	0.00819635	1.92e-06	0.049022	2.81e-06	6.90151	0.106
6721	Sample68	0.00820134	1.78e-06	0.0494149	2.63e-06	6.85035	0.0811		8.10207	12.4369	0.0893826
6721	Sample69	0.0082045	1.71e-06	0.0490135	2.12e-06	6.85396	0.0963
6721	Sample70	0.0081422	2.44e-06	0.0494145	2.51e-06	6.86431	0.0918		8.21978	12.5551	0.0804114
6721	Sample71	0.00817461	1.81e-06	0.0490098	2.2e-06	7.24275	0.0796
6721	Sample72	0.00819109	2.23e-06	0.0494149	2.49e-06	7.05232	0.0921		8.2227	12.5581	0.0834972
6721	Sample73	0.00815657	2.44e-06	0.049014	2.41e-06	6.87519	0.0851
6721	Sample74	0.00821315	2.48e-06	0.0494178	3.03e-06	6.76177	0.0789		8.28762	12.6233	0.0987484
6721	Sample75	0.00818663	1.78e-06	0.0490093	2.93e-06	6.76714	0.115
6721	Sample76	0.00820051	1.68e-06	0.0494139	2.5e-06	7.20839	0.074		8.31607	12.6518	0.0938052
6721	Sample77	0.00813452	2.31e-06	0.0490034	2.53e-06	6.93244	0.0836
6721	Sample78	0.00818393	2.32e-06	0.049425	2.14e-06	8.97358	0.128		8.50584	12.8424	0.0898072
6721	Sample79	0.00814912	2.13e-06	0.0490128	2.91e-06	7.02574	0.0893
6721	Sample80	0.00818137	1.88e-06	0.04941	2.46e-06	7.26799	0.0986		8.10976	12.4446	0.0862788
6721	Sample81	0.00814688	2.44e-06	0.0490123	1.86e-06	6.83692	0.0908
6721	Sample82	0.00812926	3.05e-06	0.0494122	2.66e-06	6.84591	0.0763		8.22532	12.5607	0.0834355
6721	Sample83	0.00815447	2.66e-06	0.0490058	2.51e-06	6.6443	0.0977
6721	Sample84	0.00818277	2.38e-06	0.0494149	2.63e-06	6.9746	0.085		8.32885	12.6647	0.0932577
6721	Sample85	0.00815654	1.93e-06	0.0490077	2.79e-06	6.71249	0.0993
6721	Sample86	0.00817958	2.6e-06	0.0494131	2.34e-06	7.14083	0.091		8.3198	12.6556	0.0921791
6721	Sample87	0.0081727	2.43e-06	0.0490031	2.69e-06	6.84765	0.0907
6721	Sample88	0.00820941	2.06e-06	0.0494089	2.66e-06	7.12676	0.0938		8.26393	12.5995	0.090509
6721	Sample89	0.00816332	1.81e-06	0.0490047	2.34e-06	7.04403	0.0992
6721	Sample90	0.00821821	1.91e-06	0.0494111	2.62e-06	7.09978	0.1		8.25358	12.5891	0.0905247
6721	Sample91	0.00815687	1.98e-06	0.0490085	2.73e-06	7.00859	0.0758
6721	Sample92	0.00819776	2.49e-06	0.0494149	2.46e-06	7.03985	0.078		8.22526	12.5606	0.0842602
6721	Sample93	0.00817996	2.4e-06	0.0490151	1.91e-06	7.42437	0.0901
6721	Sample94	0.00819924	2.56e-06	0.0494119	2.54e-06	7.13125	0.0972		8.06308	12.3977	0.0781195
6721	Sample95	0.0081597	2.36e-06	0.0490182	2.16e-06	7.33715	0.077
6721	Sample96	0.00818301	1.85e-06	0.0494244	2.54e-06	6.96231	0.0886		8.31573	12.6515	0.0841504
6721	Sample97	0.00813593	2.32e-06	0.0490153	2.45e-06	7.34209	0.0882
6722	Sample1	0.00829157	1.29e-06	0.0489953	2.88e-06	7.05312	0.102		strip 2
6722	Sample2	0.00832879	9.01e-07	0.0494184	1.88e-06	7.47175	0.0824		8.51192	12.8485	0.086271
6722	Sample3	0.00829669	1.03e-06	0.0490073	2.47e-06	7.46349	0.0815
6722	Sample4	0.00833248	9.62e-07	0.0494204	2.45e-06	7.08797	0.0789		8.42884	12.7651	0.0895028
6722	Sample5	0.00829416	9.43e-07	0.0490074	2.69e-06	7.55255	0.0833
6722	Sample6	0.00833015	1.09e-06	0.0494191	2.17e-06	7.44177	0.11		8.29512	12.6308	0.0868457
6722	Sample7	0.0082942	1.04e-06	0.0490177	2.5e-06	7.86877	0.0782
6722	Sample8	0.00832907	1.1e-06	0.0494247	1.92e-06	7.46197	0.0812		8.40989	12.7461	0.0826983
6722	Sample9	0.00829355	9.3e-07	0.0490073	2.56e-06	7.29175	0.1
6722	Sample10	0.00832955	8.87e-07	0.0494226	2.01e-06	7.5701	0.0938		8.42424	12.7605	0.0823441
6722	Sample11	0.00829462	9.46e-07	0.0490122	2.4e-06	7.44393	0.0654
6722	Sample12	0.00832816	9.93e-07	0.0494211	2.26e-06	7.37062	0.1		8.42871	12.765	0.0854636
6722	Sample13	0.00829207	8.51e-07	0.049004	2.6e-06	6.83264	0.106
6722	Sample14	0.00833059	8.89e-07	0.0494256	2.43e-06	7.23376	0.0815		8.43958	12.7759	0.0921676
6722	Sample15	0.00829409	1.03e-06	0.0490199	2.8e-06	7.17115	0.107
6722	Sample16	0.00832992	1.01e-06	0.0494299	2.27e-06	7.48557	0.106		8.45993	12.7963	0.0901186
6722	Sample17	0.00829587	9.15e-07	0.0490105	2.57e-06	7.34135	0.101
6722	Sample18	0.00833063	9.19e-07	0.0494271	2.46e-06	7.56141	0.0882		8.4677	12.8041	0.0884784
6722	Sample19	0.00829625	1.04e-06	0.0490137	2.5e-06	7.29819	0.0814
6722	Sample20	0.00833014	9.94e-07	0.0494221	2.16e-06	7.67439	0.0954		8.31478	12.6505	0.0824068
6722	Sample21	0.00829516	1.14e-06	0.0490154	2.34e-06	7.30963	0.0651
6722	Sample22	0.00833064	1.07e-06	0.049427	2.47e-06	7.31557	0.0952		8.44952	12.7859	0.0845839
6722	Sample23	0.00829665	9.52e-07	0.0490103	2.39e-06	7.2671	0.0774
6722	Sample24	0.00833019	1.08e-06	0.0494271	2.26e-06	7.38616	0.0754		8.45403	12.7904	0.0829836
6722	Sample25	0.00829366	8.27e-07	0.049015	2.41e-06	7.67268	0.0845
6722	Sample26	0.00833056	9.3e-07	0.049436	1.82e-06	9.10426	0.161		8.51575	12.8524	0.0755933
6722	Sample27	0.008296	1.05e-06	0.0490221	2.16e-06	7.61978	0.0811
6722	Sample28	0.00833233	4.15e-07	0.0494471	1.38e-06	26.1479	0.131		8.5052	12.8418	0.0794653
6722	Sample29	0.00829724	9.79e-07	0.0490382	2.94e-06	7.59129	0.0858
6722	Sample30	0.00833118	9.09e-07	0.0494291	2.25e-06	7.68467	0.0879		8.10178	12.4366	0.0924353
6722	Sample31	0.0082953	8.93e-07	0.0490255	2.63e-06	7.09643	0.0806
6722	Sample32	0.00832457	1.22e-06	0.0494033	2.17e-06	6.43211	0.0686		7.86594	12.1998	0.0874256
6722	Sample33	0.00829151	9.72e-07	0.0490099	2.61e-06	7.36698	0.0754
6722	Sample34	0.00833003	9.81e-07	0.0494147	2.25e-06	7.44375	0.0872		8.15558	12.4906	0.083874
6722	Sample35	0.00829485	8.79e-07	0.04902	2.26e-06	7.82228	0.0885
6722	Sample36	0.00833193	1.01e-06	0.0494237	2.56e-06	7.34934	0.0852		8.20096	12.5362	0.0827087
6722	Sample37	0.00829634	9.33e-07	0.0490234	2.21e-06	7.98181	0.085
6722	Sample38	0.00833278	8.65e-07	0.0494187	2.45e-06	7.68429	0.087		8.09732	12.4321	0.0838389
6722	Sample39	0.00829354	1.09e-06	0.0490201	2.47e-06	7.67868	0.0835
6722	Sample40	0.00832969	8.67e-07	0.0494217	2.42e-06	7.34961	0.1		8.2412	12.5766	0.0870623
6722	Sample41	0.00829433	9.17e-07	0.0490154	2.52e-06	7.2354	0.081
6722	Sample42	0.00832633	9.56e-07	0.0494168	2.54e-06	7.09065	0.0719		8.22371	12.5591	0.0861988
6722	Sample43	0.00829309	1.01e-06	0.0490121	2.27e-06	6.98202	0.0925
6722	Sample44	0.00833062	9.04e-07	0.0494225	2.91e-06	7.49406	0.11		8.25813	12.5936	0.0890474
6722	Sample45	0.00829773	8.39e-07	0.0490234	2.36e-06	7.91129	0.0881
6722	Sample46	0.00833348	8.64e-07	0.0494236	2.7e-06	7.48018	0.0872		8.16818	12.5033	0.0880849
6722	Sample47	0.0082972	9.86e-07	0.0490229	2.43e-06	7.64205	0.0738
6722	Sample48	0.00833449	1.13e-06	0.0494205	2.69e-06	7.30206	0.0711		8.1975	12.5327	0.0899119
6722	Sample49	0.00829599	9.16e-07	0.0490144	2.53e-06	7.17528	0.0996
6722	Sample50	0.00832921	1.04e-06	0.0494175	2.52e-06	7.03516	0.0716		8.2382	12.5736	0.0934959
6722	Sample51	0.00829416	9.87e-07	0.0490131	2.89e-06	7.05707	0.102
6722	Sample52	0.00833005	1.07e-06	0.0494225	2.74e-06	7.1373	0.0912		8.34968	12.6856	0.0957752
6722	Sample53	0.00829533	7.87e-07	0.0490134	2.51e-06	7.48412	0.098
6722	Sample54	0.00833045	9.11e-07	0.0494194	2.63e-06	7.03882	0.0721		8.29137	12.627	0.0917729
6722	Sample55	0.00829603	1.09e-06	0.0490126	2.67e-06	7.03544	0.0981
6722	Sample56	0.00833329	1.05e-06	0.0494244	2.48e-06	7.45184	0.0809		8.37106	12.7071	0.0939092
6722	Sample57	0.00829471	1.01e-06	0.0490155	2.83e-06	7.32879	0.0723
6722	Sample58	0.00833144	1.03e-06	0.0494173	2.64e-06	7.34648	0.0808		8.18033	12.5155	0.0926543
6722	Sample59	0.00829712	8.55e-07	0.0490172	2.4e-06	7.68929	0.0783
6722	Sample60	0.00833021	9.57e-07	0.0494182	2.82e-06	7.23754	0.0796		8.20981	12.5451	0.0941837
6722	Sample61	0.00829586	1.05e-06	0.0490143	2.78e-06	7.1257	0.0943
6722	Sample62	0.00832995	8.76e-07	0.0494222	2.61e-06	7.26495	0.082		8.32648	12.6623	0.0963985
6722	Sample63	0.00829428	9.48e-07	0.049014	2.81e-06	7.3332	0.0865
6722	Sample64	0.00833236	9.5e-07	0.0494265	2.32e-06	7.52576	0.0674		8.44364	12.78	0.0936866
6722	Sample65	0.00829781	1.09e-06	0.0490112	2.81e-06	7.42182	0.0921
6722	Sample66	0.00833343	1.07e-06	0.0494269	2.18e-06	7.49261	0.0743		8.38925	12.7253	0.0841736
6722	Sample67	0.0082962	9.1e-07	0.0490202	2.11e-06	7.70902	0.0865
6722	Sample68	0.00833017	1.01e-06	0.0494195	2.92e-06	7.06138	0.0932		8.15272	12.4878	0.0861013
6722	Sample69	0.0082965	9.69e-07	0.0490194	2.23e-06	7.68686	0.105
6722	Sample70	0.0083306	1.18e-06	0.0494236	2.44e-06	7.00588	0.0786		8.33457	12.6704	0.0812141
6722	Sample71	0.00829198	1.1e-06	0.0490108	2.24e-06	6.86989	0.101
6722	Sample72	0.00833093	1e-06	0.0494224	3e-06	6.83564	0.0788		8.34641	12.6823	0.0940899
6722	Sample73	0.00829484	9.95e-07	0.0490158	2.72e-06	7.09999	0.0964
6722	Sample74	0.00832946	9.95e-07	0.0494266	2.84e-06	7.16732	0.0774		8.4179	12.7541	0.0934823
6722	Sample75	0.00829586	9.85e-07	0.0490122	2.38e-06	7.56483	0.0691
6722	Sample76	0.00832817	9.64e-07	0.0494248	2.55e-06	7.18682	0.0741		8.40957	12.7457	0.0892484
6722	Sample77	0.0082957	1.02e-06	0.049013	2.66e-06	6.91311	0.0939
6722	Sample78	0.00833318	9.69e-07	0.0494249	2.69e-06	7.15087	0.073		8.35379	12.6897	0.0874047
6722	Sample79	0.00829807	9.41e-07	0.0490179	2.04e-06	7.36515	0.0835
6722	Sample80	0.00833149	9.8e-07	0.0494174	2.86e-06	7.15906	0.0807		8.18947	12.5247	0.0831693
6722	Sample81	0.00829724	9.47e-07	0.049014	2.1e-06	7.66695	0.0794
6722	Sample82	0.00833214	8.83e-07	0.0494251	2.58e-06	7.29149	0.0873		8.37537	12.7114	0.0834151
6722	Sample83	0.00829733	8.65e-07	0.0490151	2.4e-06	7.74413	0.0915
6722	Sample84	0.00833203	9e-07	0.0494225	2.29e-06	7.37257	0.0791		8.31728	12.653	0.0854034
6722	Sample85	0.00829706	9.18e-07	0.0490145	2.57e-06	7.64477	0.0937
6722	Sample86	0.00833054	8.71e-07	0.0494221	2.48e-06	7.20459	0.072		8.28393	12.6195	0.0863126
6722	Sample87	0.00829704	9.8e-07	0.0490175	2.29e-06	7.37333	0.0895
6722	Sample88	0.00833044	9.65e-07	0.0494331	2.34e-06	7.45433	0.0692		8.42666	12.7629	0.0811569
6722	Sample89	0.00829718	9.55e-07	0.0490226	2.28e-06	7.57823	0.0857
6722	Sample90	0.00833315	8.23e-07	0.0494308	2.3e-06	7.42732	0.0712		8.35052	12.6864	0.0854095
6722	Sample91	0.0082955	1.05e-06	0.0490204	2.67e-06	7.78904	0.0834
6722	Sample92	0.00833178	1.08e-06	0.0494231	2.48e-06	7.27439	0.0913		8.29177	12.6274	0.0888952
6722	Sample93	0.00829377	9.47e-07	0.049013	2.41e-06	7.42326	0.0838
6722	Sample94	0.00833014	8.22e-07	0.049418	2.29e-06	6.94608	0.0852		8.25675	12.5922	0.0823791
6722	Sample95	0.00829877	9e-07	0.0490135	2.31e-06	7.32174	0.0922
6722	Sample96	0.00833037	9.99e-07	0.0494279	2.37e-06	7.15619	0.0723		8.42405	12.7603	0.0810651
6722	Sample97	0.0082961	1.03e-06	0.0490165	2.22e-06	7.62676	0.0818
6722	Sample98	0.0083316	1.02e-06	0.0494259	2.88e-06	7.33255	0.102		8.45372	12.7901	0.089832
6722	Sample99	0.00829496	8.45e-07	0.0490066	2.51e-06	7.36135	0.0901
6722	Sample1	0.00833218	1.15e-06	0.0494273	2.52e-06	7.32641	0.0776		8.46376	12.8002	0.0852861
6722	Sample2	0.00829498	1.05e-06	0.0490184	2.22e-06	7.47385	0.0855
6722	Sample3	0.00833005	1.02e-06	0.0494243	2.89e-06	7.1144	0.0813		8.23737	12.5728	0.0933234
6722	Sample4	0.00829727	1.01e-06	0.0490226	2.79e-06	7.31823	0.0708
6722	Sample5	0.00833	1.18e-06	0.0494296	2.51e-06	7.19111	0.0869		8.43373	12.77	0.0929081
6722	Sample6	0.00829351	9.17e-07	0.0490099	2.6e-06	7.14544	0.0982
6722	Sample7	0.00833001	9.83e-07	0.0494291	3.29e-06	7.38854	0.0875		8.46716	12.8036	0.0975881
6722	Sample8	0.00829627	9.82e-07	0.0490183	2.34e-06	7.73354	0.119
6722	Sample9	0.00832944	8.26e-07	0.0494248	2.39e-06	7.64084	0.082		8.3318	12.6676	0.0830445
6722	Sample10	0.00829788	1.07e-06	0.0490145	2.34e-06	7.55874	0.0967
6722	Sample11	0.00833231	1.01e-06	0.0494258	2.79e-06	7.01403	0.0745		8.29708	12.6328	0.0878893
6722	Sample12	0.00829747	9.32e-07	0.0490236	2.33e-06	7.57535	0.0795
6722	Sample13	0.00833374	1.06e-06	0.0494236	2.46e-06	7.10432	0.079		8.24139	12.5768	0.0886635
6722	Sample14	0.0082934	9.78e-07	0.0490157	2.74e-06	7.19409	0.0933
6722	Sample15	0.00832948	1.04e-06	0.0494336	2.26e-06	7.49634	0.0851		8.52389	12.8605	0.0922037
6722	Sample16	0.00829489	1e-06	0.0490159	2.81e-06	7.33707	0.092
6722	Sample17	0.00833357	9.53e-07	0.0494269	2.27e-06	7.3999	0.0962		8.35427	12.6902	0.0887327
6722	Sample18	0.00830148	9.95e-07	0.0490189	2.44e-06	7.63293	0.101
6722	Sample19	0.00833494	9.6e-07	0.0494279	2.7e-06	7.28421	0.0945		8.34104	12.6769	0.0876488
6722	Sample20	0.00830098	9.08e-07	0.0490192	2.31e-06	7.69183	0.0656
6722	Sample21	0.00833414	8.91e-07	0.0494286	2.23e-06	7.42028	0.0963		8.38341	12.7195	0.0834422
6722	Sample22	0.00829668	9.79e-07	0.0490161	2.55e-06	7.15716	0.0891
6722	Sample23	0.00833237	9.54e-07	0.0494306	2.9e-06	7.30536	0.0738		8.43686	12.7731	0.0937623
6722	Sample24	0.00829753	9.73e-07	0.049018	2.52e-06	7.28844	0.0734
6722	Sample25	0.00833348	8.67e-07	0.0494303	2.62e-06	7.2893	0.0795		8.47724	12.8137	0.0944951
6722	Sample26	0.00829748	1.13e-06	0.0490115	2.89e-06	6.8705	0.103
6722	Sample27	0.00833351	8.3e-07	0.0494274	2.63e-06	7.33934	0.0829		8.41724	12.7534	0.0983105
6722	Sample28	0.00829808	9.22e-07	0.0490182	2.84e-06	7.34914	0.0689
6722	Sample29	0.00833165	1.36e-06	0.0494175	2.88e-06	6.85046	0.0666		8.148	12.483	0.0954497
6722	Sample30	0.00830045	1.09e-06	0.049018	2.38e-06	7.43639	0.0633
6722	Sample31	0.00832965	1e-06	0.049423	2.59e-06	7.1577	0.0832		8.25436	12.5899	0.087777
6722	Sample32	0.00829637	1e-06	0.0490187	2.5e-06	7.55918	0.0739
6722	Sample33	0.00833089	9.63e-07	0.0494224	2.6e-06	7.08286	0.0837		8.19141	12.5266	0.0885774
6722	Sample34	0.00829744	9.64e-07	0.0490231	2.44e-06	7.73212	0.0949
6722	Sample35	0.00833499	1.02e-06	0.0494307	2.5e-06	7.4486	0.0899		8.3527	12.6886	0.0818527
6722	Sample36	0.00829981	9.41e-07	0.0490195	2e-06	7.44644	0.102
6722	Sample37	0.00833551	8.7e-07	0.0494216	2.25e-06	7.35832	0.098		8.25068	12.5862	0.0746521
6722	Sample38	0.00829882	1.01e-06	0.0490149	2.1e-06	7.49453	0.0794
6722	Sample39	0.00833442	1.04e-06	0.049434	2.42e-06	7.6199	0.0892		8.55396	12.8907	0.0788054
6722	Sample40	0.00829599	8.76e-07	0.0490146	2.18e-06	7.32338	0.0838
6722	Sample41	0.00833353	9.64e-07	0.0494313	2.24e-06	7.31728	0.092		8.42379	12.76	0.0818241
6722	Sample42	0.00829776	9.45e-07	0.0490221	2.53e-06	6.925	0.0773
6722	Sample43	0.0083289	1.11e-06	0.049412	2.41e-06	6.73346	0.0878		8.01513	12.3496	0.0875477
6722	Sample44	0.00829782	9.83e-07	0.0490162	2.51e-06	7.82144	0.102
6722	Sample45	0.00833473	9.2e-07	0.0494181	2.63e-06	7.69677	0.104		8.13917	12.4742	0.0884953
6722	Sample46	0.00829943	9.99e-07	0.049022	2.39e-06	7.87	0.0755
6722	Sample47	0.00833264	8.3e-07	0.0494267	2.44e-06	7.51582	0.0977		8.28962	12.6253	0.0834172
6722	Sample48	0.00829759	8.56e-07	0.0490186	2.27e-06	7.62242	0.0873
6722	Sample49	0.00833379	8.43e-07	0.0494228	2.62e-06	7.29454	0.0886		8.24183	12.5773	0.0893793
6722	Sample50	0.00829825	1.01e-06	0.049019	2.7e-06	7.39165	0.103
6722	Sample51	0.00833471	4.04e-07	0.0494528	1.41e-06	28.437	0.0937		8.63368	12.9708	0.0797694
6722	Sample52	0.00829927	9.31e-07	0.0490399	2.46e-06	7.70787	0.0963
6722	Sample53	0.00833488	8.74e-07	0.0494254	2.48e-06	7.95323	0.109		7.95395	12.2881	0.0879709
6722	Sample54	0.00829936	9.14e-07	0.0490309	2.55e-06	7.95343	0.0889
6722	Sample55	0.00833322	8.76e-07	0.0494263	2.94e-06	7.80261	0.0911		8.21174	12.5471	0.0925265
6722	Sample56	0.00829731	9.73e-07	0.0490165	2.36e-06	7.3932	0.0988
6722	Sample57	0.00833302	8.39e-07	0.0494201	2.32e-06	7.29918	0.0862		8.13514	12.4701	0.082227
6722	Sample58	0.00829563	9.31e-07	0.0490261	2.32e-06	7.64023	0.0896
6722	Sample59	0.00833253	9.31e-07	0.0494282	2.28e-06	7.25949	0.076		8.24165	12.5771	0.08164
6722	Sample60	0.00829797	7.55e-07	0.0490223	2.35e-06	7.44813	0.0748
6722	Sample61	0.00833345	8.95e-07	0.0494232	2.67e-06	7.73918	0.0963		8.12917	12.4641	0.0843905
6722	Sample62	0.00829928	9.88e-07	0.0490271	2.14e-06	7.8643	0.0827
6722	Sample63	0.00833352	9.29e-07	0.0494296	2.51e-06	7.62574	0.0861		8.27072	12.6063	0.0810666
6722	Sample64	0.00829996	9.49e-07	0.0490212	2.24e-06	7.60606	0.0766
6722	Sample65	0.00833564	7.76e-07	0.0494248	2.37e-06	7.53495	0.0795		8.18607	12.5213	0.0835924
6722	Sample66	0.00829978	9.23e-07	0.0490258	2.5e-06	7.47805	0.0895
6722	Sample67	0.00833282	9.18e-07	0.0494298	2.44e-06	7.36405	0.091		8.29126	12.6269	0.0834305
6722	Sample68	0.00829776	1.02e-06	0.0490208	2.15e-06	7.10575	0.102
6722	Sample69	0.00833242	1.04e-06	0.0494317	2.83e-06	7.22256	0.0713		8.42257	12.7588	0.0833687
6722	Sample70	0.00829743	9.19e-07	0.0490169	2.05e-06	7.53703	0.0876
6722	Sample71	0.0083324	9.38e-07	0.0494263	2.47e-06	7.59082	0.0998		8.29997	12.6357	0.0792389
6722	Sample72	0.00829813	9.73e-07	0.049022	2.21e-06	7.62612	0.0875
6722	Sample73	0.00833413	9.64e-07	0.049425	2.83e-06	7.37616	0.0755		8.22162	12.557	0.084534
6722	Sample74	0.00829675	9.51e-07	0.0490219	2.1e-06	7.44314	0.0733
6722	Sample75	0.00833268	1.07e-06	0.049423	2.43e-06	7.01811	0.089		8.17537	12.5105	0.0806941
6722	Sample76	0.00830012	8.5e-07	0.0490227	2.33e-06	7.51425	0.105
6722	Sample77	0.00833226	9.1e-07	0.0494249	2.66e-06	7.21268	0.084		8.24446	12.5799	0.090124
6722	Sample78	0.00829788	9.91e-07	0.0490189	2.67e-06	7.45965	0.0828
6722	Sample79	0.00833343	9.09e-07	0.0494235	2.88e-06	7.10564	0.105		8.2011	12.5364	0.0935901
6722	Sample80	0.00830097	9.72e-07	0.0490241	2.4e-06	7.76835	0.0789
6722	Sample81	0.00833164	1.08e-06	0.0494268	2.61e-06	7.34497	0.0872		8.15376	12.4888	0.0879972
6722	Sample82	0.00829933	8.43e-07	0.04903	2.48e-06	7.70003	0.0859
6722	Sample83	0.00833341	1.08e-06	0.0494282	2.7e-06	7.12819	0.0802		8.22663	12.562	0.093587
6722	Sample84	0.00830081	1.08e-06	0.0490199	2.78e-06	7.35001	0.086
6722	Sample85	0.00833309	8.75e-07	0.0494264	2e-06	7.07153	0.0843		8.28237	12.618	0.084916
6722	Sample86	0.00829946	9.69e-07	0.049021	2.38e-06	7.25488	0.0768
6722	Sample87	0.0083349	7.82e-07	0.0494236	2.65e-06	7.18917	0.0912		8.16211	12.4972	0.0885008
6722	Sample88	0.00830017	9.84e-07	0.049026	2.5e-06	7.63795	0.0913
6722	Sample89	0.00833539	8.75e-07	0.04943	2.44e-06	7.72138	0.0996		8.22429	12.5597	0.090461
6722	Sample90	0.00830166	7.21e-07	0.0490275	2.75e-06	7.88933	0.0979
6722	Sample91	0.0083329	1.06e-06	0.0494221	2.9e-06	7.38439	0.0911		8.10539	12.4402	0.0970771
6722	Sample92	0.00830136	9.9e-07	0.049022	2.61e-06	7.41449	0.101
6722	Sample93	0.0083349	1e-06	0.0494274	2.56e-06	7.43944	0.102		8.24456	12.58	0.0905624	12.6387	0.271861	n=96
6722	Sample94	0.00830189	1.08e-06	0.0490245	2.54e-06	7.3642	0.0832
1759740	Sample1	0.00829221	7.97e-07	0.0489723	2.05e-06	8.43616	0.091		strip 3
1759740	Sample2	0.00832755	8.62e-07	0.0493923	2.54e-06	8.10397	0.101		8.5043	12.8409	0.0786318
1759740	Sample3	0.00829125	7.89e-07	0.0489793	2.07e-06	8.53068	0.101
1759740	Sample4	0.00833002	1.04e-06	0.0493916	2.24e-06	7.74248	0.093		8.46355	12.7999	0.0763172
1759740	Sample5	0.00829337	8.42e-07	0.0489748	2.18e-06	8.40311	0.0804
1759740	Sample6	0.00832354	8.16e-07	0.0493801	2.11e-06	7.82703	0.0925		8.30862	12.6443	0.0770516
1759740	Sample7	0.00829242	9.23e-07	0.0489717	2.26e-06	8.72278	0.145
1759740	Sample8	0.00832553	1.11e-06	0.049381	2.9e-06	7.40307	0.11		8.2606	12.5961	0.0889932
1759740	Sample9	0.00829218	8.24e-07	0.0489812	2.37e-06	8.13145	0.102
1759740	Sample10	0.00832694	9.67e-07	0.0493872	2.33e-06	8.11021	0.108		8.26546	12.601	0.0820581
1759740	Sample11	0.00829244	8.87e-07	0.0489836	2.28e-06	8.31707	0.0829
1759740	Sample12	0.00832845	1.03e-06	0.0493812	2.47e-06	7.93709	0.0991		8.10485	12.4397	0.0823301
1759740	Sample13	0.0082941	8.16e-07	0.0489849	2.25e-06	8.67776	0.0981
1759740	Sample14	0.00832913	8.93e-07	0.0493905	2.18e-06	8.30315	0.0826		8.38571	12.7218	0.0767893
1759740	Sample15	0.00829193	1.1e-06	0.0489746	2.1e-06	8.42953	0.0933
1759740	Sample16	0.00832752	7.8e-07	0.049395	2.61e-06	7.82537	0.122		8.51949	12.8561	0.080538
1759740	Sample17	0.00829094	8e-07	0.0489808	2.11e-06	8.26523	0.0857
1759740	Sample18	0.00832467	1.03e-06	0.0493705	2.9e-06	7.66314	0.0892		7.9499	12.2841	0.0883625
1759740	Sample19	0.00829173	8.7e-07	0.0489815	2.45e-06	8.27834	0.0944
1759740	Sample20	0.00832726	8.84e-07	0.0493813	2.56e-06	7.89984	0.117		8.13448	12.4695	0.0866638
1759740	Sample21	0.00829486	9.5e-07	0.0489842	2.36e-06	8.3826	0.101
1759740	Sample22	0.00832745	8.83e-07	0.049385	2.16e-06	7.79978	0.112		8.15671	12.4918	0.0782613
1759740	Sample23	0.0082921	9.48e-07	0.0489867	2.13e-06	8.61141	0.0842
1759740	Sample24	0.00832976	8.38e-07	0.0493922	2.53e-06	7.65901	0.0942		8.40249	12.7386	0.0797057
1759740	Sample25	0.00829269	9.08e-07	0.0489747	2.1e-06	8.00935	0.114
1759740	Sample26	0.00832467	8.58e-07	0.0493892	1.84e-06	8.22932	0.0985		8.39858	12.7347	0.0754177
1759740	Sample27	0.00829016	1.06e-06	0.0489811	2.43e-06	7.77939	0.0958
1759740	Sample28	0.00832565	9.33e-07	0.0494026	2.87e-06	7.58909	0.0997		8.55234	12.8891	0.0916472
1759740	Sample29	0.0082935	8.55e-07	0.0489863	2.48e-06	8.18067	0.0921
1759740	Sample30	0.00832695	9.04e-07	0.0493876	2.01e-06	8.13269	0.0894		8.18343	12.5186	0.0800291
1759740	Sample31	0.00829444	7.86e-07	0.0489872	2.29e-06	8.62385	0.0944
1759740	Sample32	0.0083269	9.85e-07	0.049383	2.5e-06	8.13394	0.099		8.10622	12.4411	0.084787
1759740	Sample33	0.00829341	7.4e-07	0.0489845	2.42e-06	8.27477	0.0958
1759740	Sample34	0.00832499	9.99e-07	0.0493853	2.97e-06	7.1368	0.131		8.14112	12.4761	0.0952503
1759740	Sample35	0.00829202	8.36e-07	0.0489885	2.69e-06	8.07872	0.0884
1759740	Sample36	0.00832436	8.22e-07	0.0494011	2.39e-06	8.15945	0.0808		8.45543	12.7918	0.0926096
1759740	Sample37	0.00829268	8.82e-07	0.0489852	2.78e-06	8.02674	0.0862
1759740	Sample38	0.00832194	1.08e-06	0.0493917	2.85e-06	7.75191	0.0985		8.25675	12.5923	0.0952463
1759740	Sample39	0.00828969	9.62e-07	0.0489892	2.46e-06	7.99065	0.0838
1759740	Sample40	0.00832591	1.04e-06	0.0493946	2.45e-06	7.37632	0.093		8.28817	12.6238	0.0830066
1759740	Sample41	0.00828861	7.78e-07	0.0489879	2.14e-06	8.25038	0.0927
1759740	Sample42	0.00832682	9.55e-07	0.0494101	2.43e-06	7.97725	0.0934		8.69247	13.0299	0.0822683
1759740	Sample43	0.00829391	1.01e-06	0.0489808	2.42e-06	7.77449	0.101
1759740	Sample44	0.00832904	8.87e-07	0.0494077	2.59e-06	8.42416	0.0986		8.64667	12.9838	0.0894759
1759740	Sample45	0.00829167	1.03e-06	0.0489876	2.6e-06	7.82914	0.0921
1759740	Sample46	0.00832546	8.91e-07	0.0494027	2.45e-06	8.04469	0.112		8.50703	12.8436	0.0855092
1759740	Sample47	0.00829112	1.08e-06	0.0489843	2.21e-06	7.79183	0.0894
1759740	Sample48	0.00832363	1.02e-06	0.049381	2.63e-06	7.40551	0.108		8.18527	12.5205	0.0870803
1759740	Sample49	0.0082897	9.55e-07	0.0489759	2.55e-06	7.91129	0.0967
1759740	Sample50	0.00832554	9.1e-07	0.0494018	2.53e-06	8.27578	0.096		8.56071	12.8975	0.0870424
1759740	Sample51	0.0082913	8.46e-07	0.0489892	2.32e-06	8.08445	0.101
1759740	Sample52	0.00832337	1e-06	0.0493859	2.72e-06	7.43147	0.132		8.1155	12.4504	0.0896015
1759740	Sample53	0.00829096	9.21e-07	0.0489876	2.57e-06	8.24259	0.0731
1759740	Sample54	0.00832617	8.41e-07	0.0493902	2.36e-06	8.15838	0.0839		8.1581	12.4932	0.0835415
1759740	Sample55	0.00829327	9.27e-07	0.0489936	2.16e-06	7.83818	0.0871
1759740	Sample56	0.00832419	1.01e-06	0.0494053	2.28e-06	7.37492	0.103		8.53302	12.8697	0.0860909
1759740	Sample57	0.00829209	1.01e-06	0.0489811	2.83e-06	7.81078	0.0965
1759740	Sample58	0.00832456	9.21e-07	0.049401	2.29e-06	7.82253	0.113		8.59925	12.9362	0.092949
1759740	Sample59	0.0082916	9.58e-07	0.0489786	2.75e-06	7.82947	0.0973
1759740	Sample60	0.00832772	7.87e-07	0.0494023	2.56e-06	7.76823	0.086		8.61643	12.9535	0.086535
1759740	Sample61	0.00829736	7.96e-07	0.0489819	1.99e-06	7.99104	0.119
1759740	Sample62	0.00833293	9.2e-07	0.0494083	2.53e-06	8.00029	0.104		8.71947	13.057	0.0819373
1759740	Sample63	0.00829321	9.49e-07	0.0489804	2.42e-06	7.5159	0.0961
1759740	Sample64	0.00832765	7.99e-07	0.0494046	3.07e-06	7.7814	0.114		8.65051	12.9877	0.0979471
1759740	Sample65	0.00828994	8.25e-07	0.0489814	2.81e-06	7.58584	0.107
1759740	Sample66	0.00832604	9.56e-07	0.0494053	2.39e-06	7.87106	0.098		8.53148	12.8682	0.0870348
1759740	Sample67	0.00829172	8.28e-07	0.0489934	2.16e-06	8.31219	0.0952
1759740	Sample68	0.00832654	9.13e-07	0.0493926	2.27e-06	7.74792	0.0994		8.16574	12.5009	0.0817357
1759740	Sample69	0.00829462	9.43e-07	0.0489916	2.51e-06	8.26002	0.105
1759740	Sample70	0.00832899	8.68e-07	0.0493945	2.27e-06	7.97659	0.101		8.25257	12.5881	0.0840096
1759740	Sample71	0.0082927	9.25e-07	0.0489888	2.36e-06	7.87042	0.11
1759740	Sample72	0.00832628	8.38e-07	0.0493991	2.47e-06	8.14958	0.101		8.42622	12.7625	0.085215
1759740	Sample73	0.0082887	9.01e-07	0.0489839	2.42e-06	7.87522	0.113
1759740	Sample74	0.00832666	8.73e-07	0.0493994	2.71e-06	7.75735	0.0953		8.36556	12.7015	0.084558
1759740	Sample75	0.00829221	8.93e-07	0.0489952	2.02e-06	8.12993	0.0873
1759740	Sample76	0.00832916	8.81e-07	0.0493987	2.7e-06	7.7289	0.0873		8.19837	12.5336	0.081098
1759740	Sample77	0.0082952	9.67e-07	0.0489989	2.13e-06	8.20792	0.0885
1759740	Sample78	0.00832777	1.04e-06	0.0493958	2.25e-06	7.76211	0.0826		8.16746	12.5026	0.0832741
1759740	Sample79	0.0082934	8.44e-07	0.0489924	2.67e-06	7.97952	0.105
1759740	Sample80	0.00832936	8.25e-07	0.0494065	2.01e-06	8.0076	0.0895		8.43248	12.7687	0.08028
1759740	Sample81	0.0082942	8.83e-07	0.0489942	2.09e-06	8.12405	0.11
1759740	Sample82	0.00832774	8.72e-07	0.0494089	2.36e-06	7.80157	0.106		8.45891	12.7953	0.0798888
1759740	Sample83	0.00829106	8.96e-07	0.0489947	2.34e-06	8.015	0.0906
1759740	Sample84	0.0083265	7.65e-07	0.0494035	2.31e-06	8.0602	0.109		8.33326	12.6691	0.0816759
1759740	Sample85	0.00829128	8.59e-07	0.0489958	2.3e-06	8.25873	0.11
1759740	Sample86	0.00832502	9.76e-07	0.049392	2.63e-06	8.19419	0.109		8.11635	12.4513	0.0839961
1759740	Sample87	0.00829397	8.74e-07	0.0489928	2.2e-06	8.16747	0.109
1759740	Sample88	0.0083295	8.71e-07	0.049411	2.2e-06	8.13828	0.101		8.60007	12.9371	0.0796211
1759740	Sample89	0.00829299	1.11e-06	0.0489866	2.37e-06	7.60464	0.121
1759740	Sample90	0.00832991	9.22e-07	0.0494082	2.46e-06	7.87994	0.0856		8.54045	12.8772	0.086768
1759740	Sample91	0.00829297	1.06e-06	0.048993	2.55e-06	7.75775	0.0883
1759740	Sample92	0.00832956	1e-06	0.0494112	2.49e-06	8.20462	0.0884		8.53509	12.8718	0.0876833
1759740	Sample93	0.00829482	8.31e-07	0.0489931	2.42e-06	8.1087	0.105
1759740	Sample94	0.00833053	8.77e-07	0.0493988	2.18e-06	7.79273	0.112		8.21477	12.5501	0.0837339
1759740	Sample95	0.00829518	8.7e-07	0.0489994	2.51e-06	8.27362	0.0992
1759740	Sample96	0.0083302	7.95e-07	0.0493958	2.32e-06	7.90725	0.107		8.09926	12.4341	0.090365
1759740	Sample97	0.00829239	8.3e-07	0.0489984	2.83e-06	8.20814	0.109
1759771	Sample1	0.00832666	9.33e-07	0.0494005	2.6e-06	8.05245	0.101		8.20063	12.5359	0.0914718
1759771	Sample2	0.00829216	8.77e-07	0.048999	2.33e-06	8.04794	0.0885
1759771	Sample3	0.00832643	1.02e-06	0.0493978	2.5e-06	7.58429	0.106		8.10615	12.441	0.0838187
1759771	Sample4	0.00829464	9.61e-07	0.0490022	2.3e-06	7.85264	0.0832
1759771	Sample5	0.00832603	9.39e-07	0.0493997	2.38e-06	7.5835	0.0735		8.12938	12.4643	0.0847945
1759771	Sample6	0.00829238	8.54e-07	0.0490004	2.53e-06	7.80555	0.0821
1759771	Sample7	0.0083263	9.5e-07	0.0494025	2.63e-06	7.83268	0.0961		8.2219	12.5573	0.0896721
1759771	Sample8	0.00828968	9.67e-07	0.0489988	2.47e-06	8.24351	0.0865
1759771	Sample9	0.00832773	9.09e-07	0.0494163	2.6e-06	7.92351	0.0948		8.5975	12.9345	0.0853781
1759771	Sample10	0.00828735	8.38e-07	0.0489913	2.18e-06	7.81217	0.115
1759771	Sample11	0.00832617	9.03e-07	0.0494036	2.15e-06	8.11254	0.104		8.40456	12.7407	0.0835404
1759771	Sample12	0.00828938	1.04e-06	0.0489924	2.73e-06	7.52229	0.101
1759771	Sample13	0.00832486	9.9e-07	0.0494023	2.68e-06	7.87602	0.0855		8.3383	12.6742	0.0893953
1759771	Sample14	0.00829149	9.94e-07	0.0489952	2.16e-06	8.07602	0.083
1759771	Sample15	0.0083268	9.08e-07	0.0494018	2.72e-06	7.72899	0.087		8.27521	12.6108	0.0882656
1759771	Sample16	0.00829361	7.83e-07	0.0489975	2.6e-06	8.46903	0.104
1759771	Sample17	0.00832804	9.31e-07	0.0494176	2.37e-06	8.00097	0.0848		8.65161	12.9888	0.085001
1759771	Sample18	0.00829363	9.62e-07	0.0489901	2.25e-06	7.81074	0.0925
1759771	Sample19	0.00832787	9.36e-07	0.0494132	2.5e-06	7.98588	0.0929		8.5506	12.8874	0.0856457
1759771	Sample20	0.00829253	9.8e-07	0.0489984	2.53e-06	7.91416	0.0856
1759771	Sample21	0.00832658	9.37e-07	0.049402	2.11e-06	7.56622	0.0754		8.23948	12.5749	0.0845959
1759771	Sample22	0.0082921	9.2e-07	0.0489981	2.53e-06	7.85997	0.0778
1759771	Sample23	0.00832708	7.66e-07	0.0494123	2.53e-06	8.48005	0.112		8.44454	12.7809	0.0880183
1759771	Sample24	0.0082909	8.77e-07	0.0489989	2.43e-06	7.8548	0.0812
1759771	Sample25	0.00832853	9.06e-07	0.0494061	2.24e-06	7.62893	0.123		8.33468	12.6705	0.0874206
1759771	Sample26	0.00829103	7.85e-07	0.0489965	2.74e-06	7.64041	0.0975
1759771	Sample27	0.00832687	8.45e-07	0.0494134	2.43e-06	7.72092	0.109		8.4988	12.8353	0.0866437
1759771	Sample28	0.00829306	8.84e-07	0.0489974	2.17e-06	7.61952	0.0685
1759771	Sample29	0.00832746	8.48e-07	0.049415	1.87e-06	7.79674	0.0923		8.54555	12.8823	0.0754589
1759771	Sample30	0.00829172	9.45e-07	0.0489951	2.35e-06	7.58063	0.0988
1759771	Sample31	0.00832766	9.49e-07	0.0494159	2.34e-06	7.60054	0.0904		8.54209	12.8788	0.0833181
1759771	Sample32	0.00829367	1.08e-06	0.0489996	2.4e-06	7.99998	0.115
1759771	Sample33	0.00832974	9.39e-07	0.0494035	2.52e-06	7.78828	0.11		8.28532	12.6209	0.0885361
1759771	Sample34	0.00829341	9.3e-07	0.0489954	2.61e-06	7.57543	0.111
1759771	Sample35	0.00833064	1.12e-06	0.0494159	2.38e-06	6.72865	0.0684		8.54096	12.8777	0.0905189
1759771	Sample36	0.00829397	1e-06	0.0489994	2.7e-06	7.32539	0.0821
1759771	Sample37	0.00832912	8.88e-07	0.0494164	2.08e-06	7.67586	0.0909		8.61518	12.9522	0.0865806
1759771	Sample38	0.00829399	9.34e-07	0.0489892	2.54e-06	7.74605	0.12
1759771	Sample39	0.00833069	9.54e-07	0.0494082	2.31e-06	7.16193	0.101		8.47025	12.8067	0.0834514
1759771	Sample40	0.00829476	8.34e-07	0.0489972	2.24e-06	7.98683	0.0861
1759771	Sample41	0.00832596	8.55e-07	0.0494047	2.58e-06	7.9206	0.112		8.38976	12.7258	0.0871242
1759771	Sample42	0.00829458	9.6e-07	0.04899	2.58e-06	7.6112	0.0996
1759771	Sample43	0.00832855	9.63e-07	0.0494145	2.38e-06	7.84233	0.0977		8.66029	12.9975	0.0907975
1759771	Sample44	0.00829366	1.01e-06	0.0489905	2.75e-06	7.3418	0.0956
1759771	Sample45	0.00832685	9.15e-07	0.0494086	2.3e-06	7.28511	0.0854		8.4498	12.7861	0.0859604
1759771	Sample46	0.0082922	9.77e-07	0.0489987	2.23e-06	8.34974	0.104
1759771	Sample47	0.00832761	8.77e-07	0.0494112	2.26e-06	7.933	0.114		8.38813	12.7242	0.0779137
1759771	Sample48	0.0082947	8.46e-07	0.0490016	2.14e-06	8.02479	0.0806
1759771	Sample49	0.00833013	1.12e-06	0.0494122	2.52e-06	7.2539	0.119		8.34671	12.6826	0.082867
1759771	Sample50	0.00829513	8.92e-07	0.0490046	2.38e-06	8.22184	0.0982
1759771	Sample51	0.00833122	1.01e-06	0.0494115	2.28e-06	7.19955	0.0822		8.34178	12.6776	0.0815656
1759771	Sample52	0.00829549	8.97e-07	0.0490008	2.28e-06	8.01802	0.0963
1759771	Sample53	0.00832986	1.11e-06	0.049409	2.82e-06	6.30581	0.074		8.30814	12.6439	0.0917256
1759771	Sample54	0.0082931	9.4e-07	0.049003	2.68e-06	8.19053	0.0835
1759771	Sample55	0.00833189	8.22e-07	0.0494186	2.65e-06	7.93319	0.109		8.50149	12.838	0.092945
1759771	Sample56	0.00829467	8.23e-07	0.049001	2.58e-06	7.84889	0.0929
1759771	Sample57	0.00833176	1e-06	0.0494223	2.32e-06	7.68865	0.0821		8.59984	12.9368	0.0859928
1759771	Sample58	0.00829161	8.77e-07	0.0490008	2.41e-06	7.77637	0.113
1759771	Sample59	0.00832627	1.13e-06	0.0494238	2.62e-06	6.86733	0.0938		8.65535	12.9926	0.0865467
1759771	Sample60	0.00829112	8.04e-07	0.0489986	2.33e-06	7.52921	0.0893
1759771	Sample61	0.00832415	9.84e-07	0.0494156	2.5e-06	6.53171	0.0744		8.49326	12.8298	0.0867694
1759771	Sample62	0.00829301	8.45e-07	0.0490002	2.55e-06	7.83564	0.0961
1759771	Sample63	0.00832412	1.01e-06	0.0494021	2.6e-06	7.13574	0.102		8.25807	12.5936	0.0886432
1759771	Sample64	0.00829626	9.43e-07	0.0489948	2.39e-06	7.70073	0.109
1759771	Sample65	0.00833275	1.1e-06	0.0494205	2.34e-06	7.06208	0.0866		8.53233	12.869	0.08169
1759771	Sample66	0.00829388	8.4e-07	0.04901	2.22e-06	8.25808	0.0967
1759771	Sample67	0.00833006	9.35e-07	0.0494192	2.25e-06	7.8137	0.115		8.42463	12.7609	0.0824035
1759771	Sample68	0.00829556	1.08e-06	0.0490026	2.53e-06	7.67245	0.113
1759771	Sample69	0.00833108	1.11e-06	0.0494275	2.53e-06	7.01944	0.109		8.65698	12.9942	0.0882342
1759771	Sample70	0.00828981	9.87e-07	0.0490039	2.45e-06	7.74854	0.0813
1759771	Sample71	0.0083303	9.25e-07	0.0494199	2.57e-06	8.16218	0.117		8.50918	12.8458	0.0849683
1759771	Sample72	0.0082942	1e-06	0.049002	2.2e-06	8.12008	0.086
1759771	Sample73	0.00833114	1.05e-06	0.0494109	2.24e-06	6.70354	0.117		8.42481	12.761	0.082988
1759771	Sample74	0.00829421	8.91e-07	0.0489942	2.6e-06	7.53859	0.0952
1759771	Sample75	0.0083283	9.51e-07	0.0494022	2.34e-06	7.75066	0.103		8.25601	12.5915	0.0863633
1759771	Sample76	0.00829522	9.6e-07	0.0490011	2.4e-06	7.68998	0.126
1759771	Sample77	0.00832835	8.44e-07	0.0494201	2.35e-06	7.7727	0.102		8.52489	12.8616	0.0837787
1759771	Sample78	0.00829455	8.87e-07	0.0490037	2.38e-06	7.54389	0.0891
1759771	Sample79	0.00832763	1.08e-06	0.0494119	2.68e-06	7.13058	0.107		8.30611	12.6418	0.0821989
1759771	Sample80	0.00829516	9.6e-07	0.0490061	1.87e-06	7.85222	0.0737
1759771	Sample81	0.00832878	8.92e-07	0.0494059	2.57e-06	7.76692	0.1		8.16053	12.4956	0.0828827
1759771	Sample82	0.00829596	9.02e-07	0.049006	2.55e-06	8.15033	0.0972
1759771	Sample83	0.00832924	9.15e-07	0.0494058	2.39e-06	8.05174	0.115		8.18452	12.5197	0.0910455
1759771	Sample84	0.00829594	9.44e-07	0.0490035	2.79e-06	7.44747	0.0962
1759771	Sample85	0.00833133	1.07e-06	0.0494174	2.29e-06	6.88819	0.0925		8.52197	12.8586	0.0921604
1759771	Sample86	0.0082961	1.13e-06	0.0489961	2.73e-06	7.30628	0.103
1759771	Sample87	0.00833193	1.24e-06	0.0494138	2.05e-06	5.14634	0.0599		8.41125	12.7474	0.0863069
1759771	Sample88	0.0082978	9.06e-07	0.0490071	2.51e-06	7.622	0.0953
1759771	Sample89	0.00833391	8.82e-07	0.0494216	2.1e-06	8.35144	0.108		8.40271	12.7388	0.0809625
1759771	Sample90	0.00829463	7.97e-07	0.0490124	2.26e-06	7.87189	0.0912
1759771	Sample91	0.00833031	8.14e-07	0.0494132	2.47e-06	7.22301	0.0934		8.22556	12.5609	0.0839234
1759771	Sample92	0.00829554	1.08e-06	0.0490077	2.41e-06	7.58318	0.0848
1759771	Sample93	0.00833236	9.8e-07	0.0494202	2.34e-06	7.30916	0.0963		8.44524	12.7816	0.0831917	12.7217	0.354071	n=95
1759771	Sample94	0.00829363	8.87e-07	0.0490049	2.33e-06	7.49607	0.0808
1770697	Sample41	0.00835278	1.3e-06	0.0493464	3.025e-06	9.99878	0.141		STRIP4
1770697	Sample42	0.0083909	1.3e-06	0.0497718	3.095e-06	9.0335	0.109		8.61773	12.9548	0.104636
1770697	Sample43	0.00835488	1.32e-06	0.0493467	2.845e-06	9.57277	0.114
1770697	Sample44	0.00839067	1.3e-06	0.0497657	2.385e-06	8.61302	0.12		8.43525	12.7715	0.0948194
1770697	Sample45	0.00835361	1.1e-06	0.0493522	2.865e-06	9.25225	0.168
1770697	Sample46	0.00838752	1.27e-06	0.0497635	2.79e-06	9.7309	0.187		8.33642	12.6723	0.102957
1770697	Sample47	0.00835276	1.2e-06	0.049352	3.155e-06	9.89534	0.131
1770697	Sample48	0.00839051	1.25e-06	0.0497812	3.03e-06	9.10783	0.137		8.53343	12.8701	0.100723
1770697	Sample49	0.00835794	1.25e-06	0.049368	2.395e-06	9.75799	0.138
1770697	Sample50	0.00839099	1.31e-06	0.0497687	2.68e-06	7.69663	0.092		8.23106	12.5665	0.0963058
1770697	Sample51	0.00835372	1.24e-06	0.0493569	3.13e-06	9.67677	0.156
1770697	Sample52	0.0083906	1.49e-06	0.0497839	3.13e-06	9.28598	0.143		8.63646	12.9736	0.106231
1770697	Sample53	0.00835322	1.26e-06	0.0493584	2.84e-06	9.26826	0.176
1770697	Sample54	0.00839167	1.42e-06	0.0497794	2.895e-06	9.09187	0.155		8.58257	12.9195	0.0945562
1770697	Sample55	0.00835439	1.18e-06	0.0493532	2.34e-06	9.31353	0.13
1770697	Sample56	0.00838987	1.35e-06	0.0497629	2.975e-06	9.68095	0.156		8.29965	12.6353	0.0961207
1770697	Sample57	0.00835286	1.4e-06	0.0493533	2.885e-06	9.19154	0.121
1770697	Sample58	0.00839042	1.3e-06	0.0497659	2.725e-06	8.59212	0.135		8.33571	12.6716	0.097339
1770697	Sample59	0.00835364	1.2e-06	0.0493557	2.73e-06	9.56931	0.152
1770697	Sample60	0.0083903	1.45e-06	0.049777	3.245e-06	8.80082	0.112		8.65893	12.9962	0.101017
1770697	Sample61	0.00835257	1.24e-06	0.0493436	2.655e-06	9.91313	0.147
1770697	Sample62	0.00838745	1.36e-06	0.0497572	2.925e-06	9.05152	0.142		8.34505	12.6809	0.0956466
1770697	Sample63	0.00835307	1.14e-06	0.0493472	2.61e-06	9.91842	0.135
1770697	Sample64	0.00838863	1.45e-06	0.0497701	3.055e-06	7.42189	0.129		8.53606	12.8728	0.0958279
1770697	Sample65	0.00835103	1.22e-06	0.0493506	2.525e-06	9.6843	0.156
1770697	Sample66	0.00838457	1.21e-06	0.0497656	3.25e-06	9.40767	0.144		8.43568	12.772	0.110675
1770697	Sample67	0.00835124	1.62e-06	0.049348	3.615e-06	9.14148	0.155
1770697	Sample68	0.00838934	1.2e-06	0.04977	2.815e-06	8.40778	0.131		8.57685	12.9137	0.108825
1770697	Sample69	0.00835004	1.38e-06	0.0493456	2.825e-06	9.56271	0.151
1770697	Sample70	0.00838805	1.51e-06	0.0497761	3.14e-06	9.30666	0.134		8.61053	12.9476	0.102573
1770697	Sample71	0.00835016	1.12e-06	0.0493568	2.82e-06	9.35968	0.132
1770697	Sample72	0.00838897	1.45e-06	0.0497695	2.96e-06	8.40718	0.157		8.34215	12.678	0.0997548
1770697	Sample73	0.00835377	1.24e-06	0.0493587	2.77e-06	9.89936	0.147
1770697	Sample74	0.00838949	1.39e-06	0.0497797	3.055e-06	8.44828	0.121		8.45779	12.7942	0.105254
1770697	Sample75	0.008355	1.44e-06	0.0493657	3.185e-06	9.51661	0.159
1770697	Sample76	0.0083884	1.29e-06	0.0497774	2.99e-06	9.30243	0.13		8.45848	12.7949	0.103854
1770697	Sample77	0.00835335	1.26e-06	0.0493542	2.71e-06	8.77035	0.142
1770697	Sample78	0.00838622	1.26e-06	0.0497627	2.77e-06	9.00164	0.135		8.30663	12.6423	0.0982978
1770697	Sample79	0.00834975	1.41e-06	0.0493513	2.94e-06	9.3391	0.16
1770697	Sample80	0.00838765	1.3e-06	0.0497749	2.9e-06	9.35187	0.133		8.57733	12.9142	0.100354
1770697	Sample81	0.00835071	1.31e-06	0.0493519	2.76e-06	9.46057	0.126
1770697	Sample82	0.0083888	1.23e-06	0.0497793	2.715e-06	9.12202	0.106		8.48245	12.8189	0.0974348
1770697	Sample83	0.00835367	1.29e-06	0.0493693	2.875e-06	9.73185	0.141
1770697	Sample84	0.00838577	1.25e-06	0.0497779	2.82e-06	8.71826	0.152		8.47495	12.8114	0.0956908
1770697	Sample85	0.00835058	1.29e-06	0.0493498	2.495e-06	9.39489	0.166
1770697	Sample86	0.0083882	1.28e-06	0.0497694	2.61e-06	9.21357	0.133		8.4873	12.8238	0.0979274
1770697	Sample87	0.00835008	1.23e-06	0.0493513	3.23e-06	9.52199	0.132
1770697	Sample88	0.00838433	1.21e-06	0.0497684	2.915e-06	9.39155	0.15		8.34989	12.6858	0.102886
1770697	Sample89	0.00835193	1.24e-06	0.0493613	2.645e-06	9.80611	0.117
1770697	Sample90	0.00838792	1.29e-06	0.0497855	2.765e-06	8.88465	0.165		8.61236	12.9494	0.0979209
1770697	Sample91	0.0083527	1.35e-06	0.0493595	2.975e-06	9.67924	0.147
1770697	Sample92	0.00838634	1.31e-06	0.0497783	3.075e-06	8.76038	0.157		8.47222	12.8086	0.105094
1770697	Sample93	0.00835399	1.28e-06	0.0493608	2.96e-06	9.28294	0.14
1770697	Sample94	0.00838578	1.35e-06	0.0497768	2.64e-06	9.29692	0.144		8.36901	12.705	0.0953837
1770697	Sample95	0.00835194	1.19e-06	0.0493665	2.56e-06	9.63644	0.134
1770697	Sample96	0.0083863	1.31e-06	0.0497696	2.74e-06	8.67127	0.129		8.19207	12.5273	0.0905174
1770697	Sample97	0.00835181	1.23e-06	0.0493639	2.455e-06	9.59503	0.106
1770697	Sample98	0.00838769	1.27e-06	0.0497859	3.285e-06	9.3558	0.133		8.57725	12.9141	0.0989234
1770697	Sample99	0.00835235	1.11e-06	0.0493612	2.685e-06	9.2923	0.161
1770728	Sample1	0.00838593	1.26e-06	0.0497938	2.62e-06	8.58651	0.117		8.70951	13.047	0.0958653
1770728	Sample2	0.0083482	1.33e-06	0.0493665	2.905e-06	9.65654	0.114
1770728	Sample3	0.00838475	1.22e-06	0.0497869	2.44e-06	8.96434	0.145		8.57433	12.9112	0.0957864
1770728	Sample4	0.00834879	1.26e-06	0.0493607	2.84e-06	9.46171	0.122
1770728	Sample5	0.00838641	1.13e-06	0.0497867	2.74e-06	8.71593	0.168		8.5616	12.8984	0.0921463
1770728	Sample6	0.00834959	1.11e-06	0.0493674	2.29e-06	9.01168	0.11
1770728	Sample7	0.00838869	1.29e-06	0.0497804	2.92e-06	9.02271	0.139		8.38875	12.7248	0.0939209
1770728	Sample8	0.00835027	1.12e-06	0.0493651	2.805e-06	8.5558	0.155
1770728	Sample9	0.00838604	1.31e-06	0.0497944	3.005e-06	8.72288	0.157		8.6383	12.9754	0.099979
1770728	Sample10	0.00834892	1.13e-06	0.0493707	2.76e-06	9.39294	0.159
1770728	Sample11	0.00838585	1.26e-06	0.0497906	2.785e-06	9.45498	0.158		8.54314	12.8799	0.104139
1770728	Sample12	0.00835066	1.49e-06	0.049367	3.345e-06	9.69454	0.128
1770728	Sample13	0.0083853	1.23e-06	0.0497743	2.52e-06	9.07641	0.143		8.27058	12.6061	0.100235
1770728	Sample14	0.0083515	1.3e-06	0.0493649	2.655e-06	9.68944	0.172
1770728	Sample15	0.00838681	1.4e-06	0.0497806	2.92e-06	8.86528	0.145		8.39676	12.7329	0.0998244
1770728	Sample16	0.00834823	1.36e-06	0.0493672	2.975e-06	9.4265	0.15
1770728	Sample17	0.00838361	1.28e-06	0.0497863	3.085e-06	8.80441	0.129		8.4444	12.7807	0.106479
1770728	Sample18	0.00835076	1.25e-06	0.0493717	3.07e-06	9.17926	0.122
1770728	Sample19	0.00838687	1.29e-06	0.0497801	2.855e-06	8.71458	0.136		8.2655	12.601	0.0980727
1770728	Sample20	0.00835013	1.22e-06	0.0493723	2.45e-06	9.50666	0.105
1770728	Sample21	0.00838627	1.29e-06	0.0497822	2.89e-06	8.82951	0.151		8.2624	12.5979	0.0964054
1770728	Sample22	0.00835254	1.28e-06	0.0493763	2.905e-06	9.73819	0.127
1770728	Sample23	0.00838702	1.21e-06	0.0497816	2.74e-06	8.89929	0.12		8.23658	12.572	0.101277
1770728	Sample24	0.00834957	1.22e-06	0.0493735	3.03e-06	9.51431	0.154
1770728	Sample25	0.00838422	1.28e-06	0.0497798	3.115e-06	8.59394	0.105		8.25402	12.5895	0.112346
1770728	Sample26	0.00834954	1.42e-06	0.0493711	3.47e-06	8.86163	0.123
1770728	Sample27	0.0083874	1.09e-06	0.0497976	2.515e-06	9.14469	0.124		8.49506	12.8316	0.105391
1770728	Sample28	0.0083503	1.33e-06	0.0493851	2.97e-06	9.91592	0.146
1770728	Sample29	0.00838903	1.27e-06	0.0497808	3.05e-06	8.54029	0.13		8.16579	12.5009	0.104024
1770728	Sample30	0.00835175	1.56e-06	0.04937	2.9e-06	9.00919	0.15
1770728	Sample31	0.00838377	1.21e-06	0.0497722	2.945e-06	8.84865	0.139		8.0811	12.4159	0.105291
1770728	Sample32	0.00835126	1.22e-06	0.0493764	3.175e-06	9.23753	0.148
1770728	Sample33	0.00838531	1.31e-06	0.0497774	2.505e-06	8.63382	0.137		8.04953	12.3841	0.0984935
1770728	Sample34	0.00835278	1.23e-06	0.0493834	2.72e-06	9.00245	0.106
1770728	Sample35	0.0083857	1.2e-06	0.0497923	2.925e-06	9.23536	0.156		8.44572	12.782	0.101868
1770728	Sample36	0.00834869	1.41e-06	0.0493671	3.08e-06	9.9389	0.159
1770728	Sample37	0.00838575	1.27e-06	0.0497969	2.935e-06	9.21662	0.15		8.62171	12.9588	0.103375
1770728	Sample38	0.00834973	1.22e-06	0.0493754	2.845e-06	9.74414	0.125
1770728	Sample39	0.00838901	1.27e-06	0.0498027	2.8e-06	8.28375	0.118		8.49898	12.8355	0.100605
1770728	Sample40	0.00835108	1.43e-06	0.0493906	2.98e-06	9.43816	0.133
1770728	Sample41	0.00838748	1.56e-06	0.0498041	3e-06	8.46892	0.139		8.39133	12.7274	0.103234
1770728	Sample42	0.00835215	1.23e-06	0.0493887	2.875e-06	9.54743	0.115
1770728	Sample43	0.00838693	1.33e-06	0.0498138	2.805e-06	9.07461	0.124		8.59293	12.9299	0.10197
1770728	Sample44	0.00835185	1.44e-06	0.0493902	3.06e-06	8.28763	0.118
1770728	Sample45	0.00839218	1.39e-06	0.0498035	2.74e-06	9.06788	0.197		8.28869	12.6243	0.101899
1770728	Sample46	0.0083562	1.2e-06	0.049398	2.93e-06	9.27778	0.137
1770728	Sample47	0.00838906	1.15e-06	0.0498251	2.925e-06	8.87277	0.121		8.45032	12.7867	0.0996373
1770728	Sample48	0.00835876	1.22e-06	0.0494173	2.69e-06	9.39304	0.135
1770728	Sample49	0.00839006	1.27e-06	0.0498324	3.32e-06	8.33298	0.115		8.61317	12.9502	0.102751
1770728	Sample50	0.00835037	1.21e-06	0.0493965	2.775e-06	9.26916	0.135
1770728	Sample51	0.00839148	1.45e-06	0.0498249	2.965e-06	8.00799	0.097		8.56396	12.9008	0.101602
1770728	Sample52	0.00835397	1.26e-06	0.0494071	2.975e-06	8.90177	0.108
1770728	Sample53	0.00839078	1.22e-06	0.0498259	2.785e-06	8.95162	0.141		8.55899	12.8958	0.102287
1770728	Sample54	0.00835437	1.32e-06	0.049399	3.01e-06	8.88156	0.149
1770728	Sample55	0.00839193	1.18e-06	0.0498133	3.06e-06	8.08046	0.0682		8.37378	12.7098	0.106706
1770728	Sample56	0.00835286	1.17e-06	0.0494003	3.085e-06	9.08934	0.118
1770728	Sample57	0.00839059	1.42e-06	0.049832	2.845e-06	9.18654	0.114		8.57845	12.9153	0.0983254
1770728	Sample58	0.00835519	1.23e-06	0.049416	2.475e-06	9.52126	0.122
1770728	Sample59	0.00839088	1.53e-06	0.049835	3.31e-06	8.60587	0.132		8.4117	12.7479	0.104123
1770728	Sample60	0.00835396	1.24e-06	0.0494226	3.095e-06	9.01511	0.093
1770728	Sample61	0.00838945	1.5e-06	0.0498266	3.38e-06	8.6623	0.103		8.50355	12.8401	0.106477
1770728	Sample62	0.00835382	1.21e-06	0.0493903	2.62e-06	9.26312	0.197
1770728	Sample63	0.00839256	1.27e-06	0.0498038	3.065e-06	8.45011	0.098		8.19507	12.5303	0.107661
1770728	Sample64	0.00835507	1.33e-06	0.0494077	3.49e-06	9.08803	0.144
1770728	Sample65	0.0083899	1.44e-06	0.0498133	2.88e-06	8.10375	0.133		8.14579	12.4808	0.110475
1770728	Sample66	0.0083589	1.22e-06	0.0494139	3.075e-06	8.30378	0.156
1770728	Sample67	0.00838985	1.46e-06	0.0498238	3.235e-06	8.70907	0.142		8.27136	12.6069	0.110645
1770728	Sample68	0.00835531	1.3e-06	0.0494162	3.185e-06	9.43366	0.13
1770728	Sample69	0.0083912	1.51e-06	0.0498463	3.165e-06	8.09306	0.0983		8.62903	12.9661	0.108838
1770728	Sample70	0.0083563	1.22e-06	0.0494234	2.99e-06	9.52428	0.123
1770728	Sample71	0.00839267	1.45e-06	0.0498422	3.05e-06	8.7962	0.122		8.41986	12.7561	0.107139
1770728	Sample72	0.00835906	1.4e-06	0.0494286	3.155e-06	9.08868	0.131
1770728	Sample73	0.00839157	1.38e-06	0.0498364	2.645e-06	8.40423	0.117		8.29832	12.634	0.103377
1770728	Sample74	0.0083559	1.35e-06	0.049424	3.045e-06	8.60771	0.102
1770728	Sample75	0.00839059	1.27e-06	0.0498314	2.925e-06	8.59145	0.146		8.23765	12.5731	0.106987
1770728	Sample76	0.00835676	1.16e-06	0.0494246	3.205e-06	9.62843	0.11
1770728	Sample77	0.00839513	1.67e-06	0.049852	3.49e-06	8.35301	0.102		8.51458	12.8512	0.110201
1770728	Sample78	0.00835793	1.31e-06	0.0494375	2.725e-06	8.97373	0.136
1770728	Sample79	0.00839744	1.53e-06	0.0498476	3.11e-06	7.97743	0.125		8.30409	12.6398	0.10374
1770728	Sample80	0.00836296	1.3e-06	0.0494367	3.06e-06	9.0645	0.129
1770728	Sample81	0.00839955	1.49e-06	0.0498508	3.425e-06	8.27445	0.112		8.40084	12.737	0.111393
1770728	Sample82	0.00835863	1.26e-06	0.0494344	3.07e-06	9.09095	0.165
1770728	Sample83	0.00839595	1.27e-06	0.0498564	2.925e-06	9.36498	0.13		8.50362	12.8402	0.100164
1770728	Sample84	0.00835952	1.29e-06	0.0494376	2.585e-06	8.77765	0.12
1770728	Sample85	0.00839864	1.25e-06	0.049848	3.23e-06	8.29758	0.105		8.32216	12.6579	0.109754
1770728	Sample86	0.00835835	1.71e-06	0.0494356	3.535e-06	8.82618	0.12
1770728	Sample87	0.00839562	1.54e-06	0.0498427	3.54e-06	8.11925	0.138		8.14237	12.4774	0.118909
1770728	Sample88	0.00835959	1.25e-06	0.0494447	3.12e-06	8.47557	0.138
1770728	Sample89	0.00839638	1.51e-06	0.0498601	3.38e-06	8.45343	0.117		8.33728	12.6731	0.105854
1770728	Sample90	0.00836095	1.19e-06	0.0494509	2.535e-06	9.08294	0.121
1770728	Sample91	0.0083979	1.4e-06	0.0498731	3.39e-06	8.22393	0.11		8.59926	12.9362	0.10287
1770728	Sample92	0.00836082	1.33e-06	0.0494448	2.855e-06	9.06667	0.129
1770728	Sample93	0.00839645	1.24e-06	0.0498606	2.48e-06	8.32765	0.0987		8.50004	12.8366	0.0958038
1770728	Sample94	0.00836051	1.48e-06	0.0494359	2.87e-06	8.38162	0.124
1770728	Sample95	0.00839904	1.14e-06	0.0498517	3.085e-06	8.29894	0.151		8.32318	12.659	0.103093
1770728	Sample96	0.00835993	1.38e-06	0.0494445	2.895e-06	8.27685	0.105
1770728	Sample97	0.00839657	1.3e-06	0.0498358	3.38e-06	8.46165	0.128		8.05532	12.39	0.115657
1770728	Sample98	0.00835991	1.61e-06	0.0494305	3.615e-06	9.42723	0.148
1770757	Sample1	0.00839489	1.48e-06	0.0498555	3.075e-06	8.52199	0.124		8.43809	12.7744	0.112962
1770757	Sample2	0.00836009	1.19e-06	0.0494461	2.97e-06	8.58683	0.118
1770757	Sample3	0.00839651	1.31e-06	0.0498621	2.955e-06	7.71826	0.0928		8.18066	12.5158	0.104565
1770757	Sample4	0.0083623	1.53e-06	0.0494689	3.055e-06	8.56139	0.106
1770757	Sample5	0.00839875	1.11e-06	0.0498679	2.75e-06	8.6513	0.117		8.10939	12.4443	0.102334
1770757	Sample6	0.00836248	1.21e-06	0.0494646	2.975e-06	9.35164	0.128
1770757	Sample7	0.00839609	1.26e-06	0.0498817	3.24e-06	8.33155	0.123		8.43179	12.768	0.108637
1770757	Sample8	0.00836136	1.42e-06	0.0494646	3.115e-06	8.32121	0.135
1770757	Sample9	0.00839442	1.12e-06	0.0498684	2.405e-06	7.8547	0.121		8.1576	12.4927	0.102292
1770757	Sample10	0.00835994	1.31e-06	0.0494652	3.195e-06	9.28227	0.111
1770757	Sample11	0.00839805	1.3e-06	0.049891	2.735e-06	7.67382	0.112		8.65639	12.9936	0.10431
1770757	Sample12	0.00835964	1.28e-06	0.0494606	3.01e-06	9.15735	0.135
1770757	Sample13	0.00839863	1.45e-06	0.049889	2.77e-06	7.58753	0.0688		8.51154	12.8481	0.10606
1770757	Sample14	0.00835873	1.45e-06	0.0494754	3.305e-06	8.92492	0.132
1770757	Sample15	0.0083972	1.48e-06	0.0499012	3.085e-06	8.47274	0.118		8.62169	12.9588	0.108645
1770757	Sample16	0.00836111	1.39e-06	0.0494739	2.935e-06	8.97954	0.103
1770757	Sample17	0.00839874	1.2e-06	0.0498995	3.075e-06	8.48285	0.152		8.61994	12.957	0.0996601
1770757	Sample18	0.00836464	1.12e-06	0.0494723	2.53e-06	8.36854	0.125
1770757	Sample19	0.00839817	1.4e-06	0.0498882	3.03e-06	8.15838	0.105		8.38277	12.7188	0.0960597
1770757	Sample20	0.00836422	1.45e-06	0.0494747	2.675e-06	8.90705	0.112
1770757	Sample21	0.00840186	1.29e-06	0.0499011	3.015e-06	8.01703	0.079		8.54005	12.8768	0.102773
1770757	Sample22	0.00836256	1.47e-06	0.0494823	3.125e-06	8.88021	0.102
1770757	Sample23	0.00839639	1.21e-06	0.0498797	3.13e-06	8.84718	0.162		8.10593	12.4408	0.107603
1770757	Sample24	0.0083634	1.43e-06	0.0494749	2.99e-06	8.85638	0.133
1770757	Sample25	0.0084009	1.32e-06	0.0498913	3.015e-06	8.21108	0.0937		8.46498	12.8014	0.098727
1770757	Sample26	0.00836269	1.01e-06	0.0494702	2.445e-06	13.7467	0.294
1770757	Sample27	0.00840173	1.47e-06	0.0498924	3.375e-06	8.02814	0.13		8.48576	12.8222	0.0980459
1770757	Sample28	0.00836148	1.07e-06	0.0494749	2.52e-06	8.80567	0.118
1770757	Sample29	0.00839882	1.34e-06	0.0499074	2.91e-06	8.19657	0.128		8.62917	12.9663	0.0983952
1770757	Sample30	0.00836283	1.41e-06	0.049486	3.005e-06	8.67921	0.116
1770757	Sample31	0.00839921	1.38e-06	0.0499119	3.185e-06	8.67661	0.142		8.33527	12.6711	0.105839
1770757	Sample32	0.00836689	1.2e-06	0.0495126	2.905e-06	9.07183	0.125
1770757	Sample33	0.00840099	1.28e-06	0.0499215	3.005e-06	8.49378	0.155		8.51077	12.8474	0.103343
1770757	Sample34	0.00836353	1.41e-06	0.0494878	2.975e-06	8.88639	0.126
1770757	Sample35	0.00839851	1.74e-06	0.0499177	3.475e-06	7.74322	0.124		8.62503	12.9621	0.106991
1770757	Sample36	0.00836371	1.32e-06	0.0494939	2.705e-06	8.58662	0.107
1770757	Sample37	0.00840309	1.38e-06	0.0499134	3.025e-06	8.12921	0.117		8.49121	12.8277	0.097055
1770757	Sample38	0.00836406	1.28e-06	0.0494924	2.6e-06	9.02613	0.133
1770757	Sample39	0.00840128	1.36e-06	0.0499027	2.925e-06	8.73442	0.108		8.29129	12.6269	0.0955383
1770757	Sample40	0.00836284	1.37e-06	0.0494922	2.68e-06	8.9208	0.107
1770757	Sample41	0.00840039	1.2e-06	0.0499026	3.045e-06	8.52928	0.167		8.2455	12.581	0.106714	12.7564	0.324017	n=99
1770757	Sample42	0.00836479	1.41e-06	0.0494968	3.405e-06	8.77914	0.123
